# Supplementary material for: Exome sequencing identifies recurrent mutations of the splicing factor SF3B1 gene in chronic lymphocytic leukemia
Source: Springer Nature journal article supplement (doi:10.1038/ng.1032), 2011-12-11
Supplement: 41588_2012_BFng1032_MOESM26_ESM.pdf [file 41588_2012_BFng1032_MOESM26_ESM.pdf]

## **Supplementary Note**

### **(Quesada *et al.*, Exome-Sequencing Identifies Recurrent Mutations of the Splicing Factor SF3B1 in Chronic Lymphocytic Leukemia)**

The clinical and biological characteristics of the 105 patients selected for exome-sequencing are shown in **Supplementary Table 1**. Among these patients, which form a population-based cohort, 45 had *IGHV*-unmutated genes, and 60 *IGHV*-mutated genes (<98% identity). The tumor samples used for exome sequencing were obtained before administration of any treatment. The four patients previously examined by WGS and exome sequencing were not included in the present study. All patients gave informed consent for their participation in the study following the International Cancer Genome Consortium (ICGC) guidelines. To determine the clinical impact of *SF3B1* mutations, we expanded the study to 174 additional patients with CLL and 156 with non-Hodgkin's lymphomas. The clinical and biological characteristics of these patients are summarized in **Supplementary Table 14**. The patients with non-Hodgkin's lymphomas were selected based on the availability of frozen tissue with a confirmed tumor component. The diagnosis of these cases were 44 follicular lymphomas, 47 mantle cell lymphomas, 7 splenic marginal zone lymphomas, 51 diffuse large B-cell lymphomas and 7 peripheral T-cell lymphomas. The patients for this mutational screening and clinical validation agreed to an Institutional Review Board-approved informed consent for genetic studies.

The tumor samples used for exome sequencing were obtained from fresh or cryopreserved mononuclear cells. To purify the CLL fraction, samples were incubated with a cocktail of magnetically-labelled antibodies directed against T cells, NK cells, monocytes and granulocytes (CD2, CD3, CD11b, CD14, CD15 and CD56), adjusted to the percentage of each contaminating population (AutoMACS, Miltenyi Biotec). The degree of contamination by non-CLL cells in the CLL fraction was assessed by immunophenotype and flow cytometry. Whole blood was sedimented by 2% dextran and the leukocyte fraction was obtained. DNA was extracted from purified samples by using a Qiagen kit, and the quality of purified DNA was assessed by SYBR-green staining on agarose gels and

quantified using Nanodrop ND-100 spectrophotometer. The tumor DNA samples for exome sequencing contained  $\geq 95\%$  neoplastic cells and the contamination by neoplastic cells in normal DNA was  $< 2\%$ . The samples for the CLL validation cohort contained  $> 30\%$  neoplastic cells

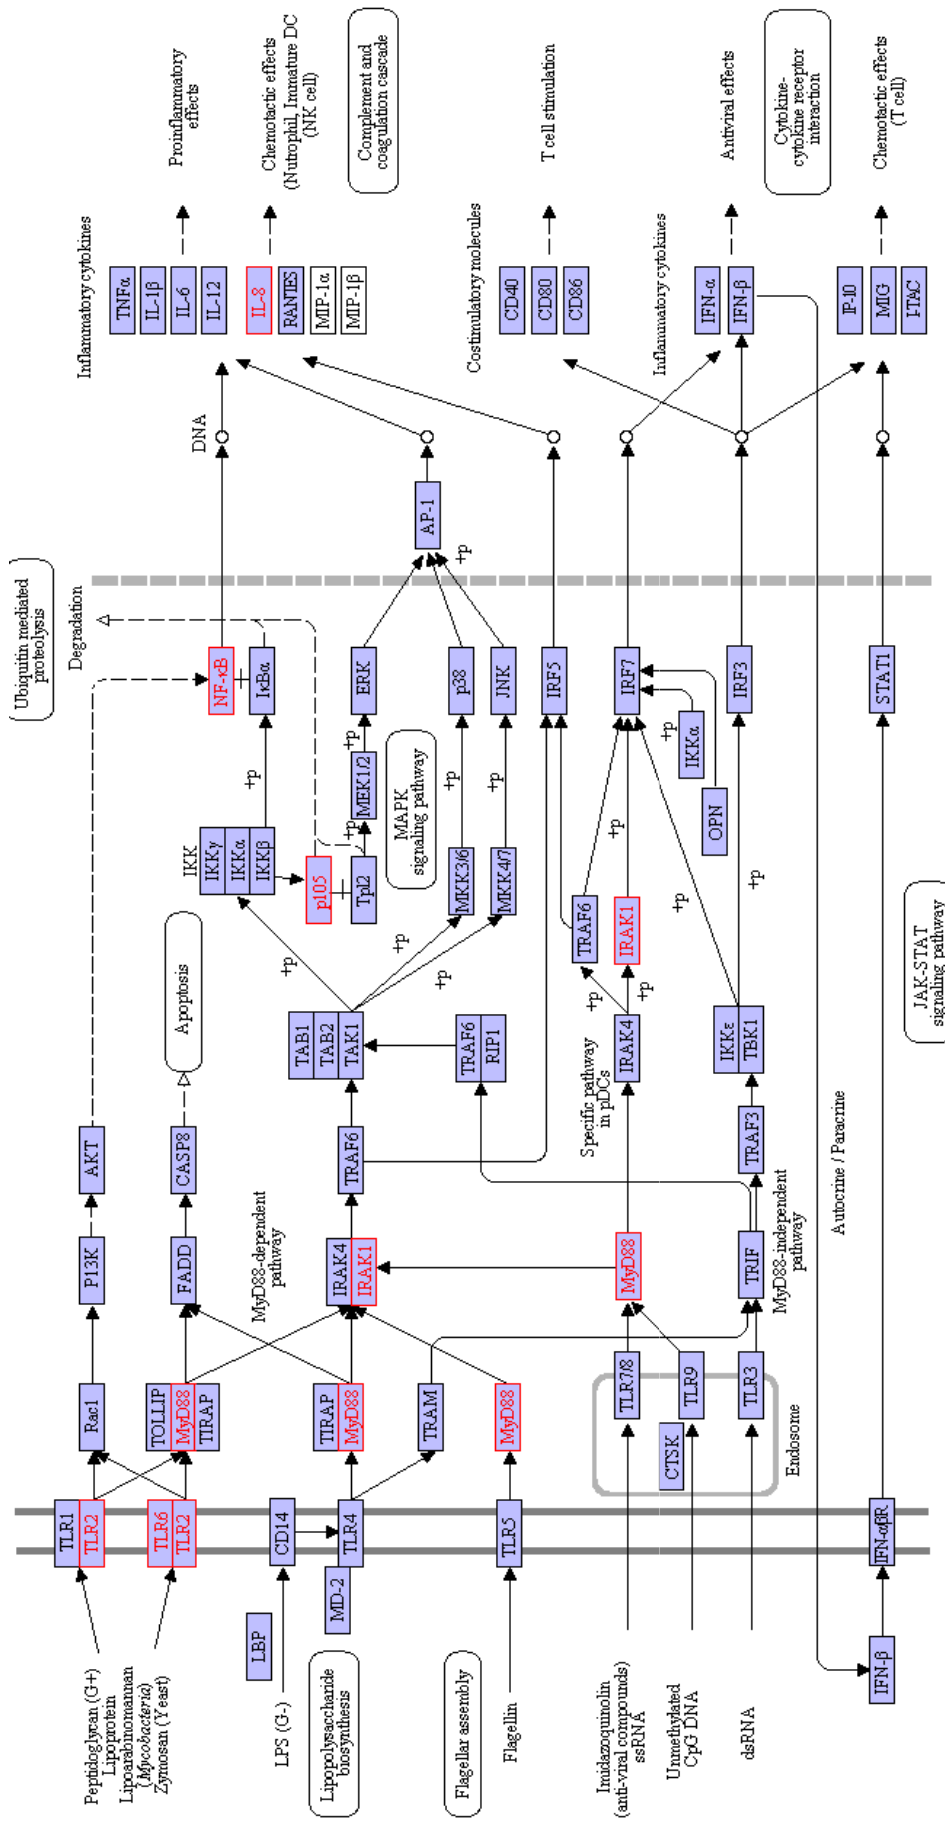

**Supplementary Figure 1. Mutations in components of Toll-like receptor signaling pathways. The KEGG (<http://www.genome.jp/kegg/>) pathway including Toll-like receptor signaling is depicted. Somatic mutated genes in CLL are highlighted in red.**

```

Haa_SF3B1 : KRKRWD OTADOTPGA-----TPKKLSWDQAEPTGHTPSLRWDETPGRAKSGSETGATP---GSKLMDPHESHTPAGAAATPGRGDTPGHGATSSARKRWDTPKTE-----R : 301
Dme_SF3B1 : KRKRWL QTVSDSFI PAKMATPSSAATPTWEDK-----TPGDHRWDETPG-KHKGSEI PGMAT-GLGTRLMDAIFAHAVT-----PGHETPGH---EKSSARRKWDTPKTE-----R : 305
Cel_1_SF3B1 : KRKRWLAEAPSTDAASNDTASATPSQGSAPRKRILG-----FSKISADAF-----RAARWDEIFAHSTG-----AADATP SVYDKWSTTPAQAQTPRRNRWDETPKEN-----L : 285
Ani_1_SF3B1 : KLLAEKQARGENGVOEHEATLKLDDKENAEAG-----STVSVAIGRKRKQWVVAHDETP-----AAPTSDDAKAKKSWDQAPAG----- : 256
Osa_1_SF3B1 : KRKRWLQS QEDDEGDAAGAKKAKTA-----SSSSSHWDAAP-----DAATP-----GIGRWDAIFGRAGG-----ATP SLKRRWDETPFGRWADAD : 370

Haa_SF3B1 : DTPCHGSGVAETPRTRDK-----GGDSIGETPTGAKRKRWTEPASOMGG-----STPVLTPG-KTFLICTPAMNATTPGHIMSMIPBGLCAWRWER : 390
Dme_SF3B1 : ETPGH-SGVAETPKPDRTPGSGGAESISIESTGPKRRSRWTEPENA TPA TPNV SAMTNPMTPTSMTPHVP GHATPMLTPFGGATP LCKAMAMAE SAGALAMIPBGLCAWRWK : 424
Cel_1_SF3B1 : NDGSMITPQGMETPARG-----GSDDVKIEDTISAKRKRSRWLIPTSQTFN-----VAATPLHSGLQTF SFTPSHP SQPTIGAMT PGGTICTAAMGKATAP-HMTFMIPBGLCAWRWK : 397
Ani_1_SF3B1 : -----CGEAPKRRSRMTQAP-----AI AATVINGGLATPWHPSQVGAHAEITSG-----T : 304
Osa_1_SF3B1 : GTPAPSVADSS-----TPTPQKQSRWTEIFAGVGS-----TAPRATDAVPAGVAPGHTPDAADLAPSGQIARGHMLPBGYCLLRWER : 454

Haa_SF3B1 : EIDERNPLSDEIDAMFP-EGKVMLEPPAGYVPIRPAKLIATPILFLGGMGFMHMDERT------MKSVNDQ-SG-NLEFLKPIEIOVDFLLVDVIES-TLSPEOERMI : 497
Dme_SF3B1 : EIDERNPLSDEIDQIFP-PGKLEPPAGYVPIRPAKLIATPILFLGGMGFMHMDERT------AKFMNQ-KQNL-EMKPEAQAQDFLLVDVIED-SLSPEELERMI : 533
Cel_1_SF3B1 : EIDERNPLSDEIDSLP-PGKVMLEPPAGYVPIRPAKLIATPILFLGGMGFMHMDERT------KNAEFLPKPFGKQVDFLLVDVIED-SLSPEELERMI : 515
Ani_1_SF3B1 : DJGRNPLSDEIDAMLPSEGVKLEPPAGYVPIRPAKLIATPILFLGGMGFMHMDERT------KOLPTELOFRPPEMAMFGALMDTGFDS-TMWSPEELERMI : 420
Osa_1_SF3B1 : EIDERNPLSDEIDTMLPQVGVKLEPPAGYVPIRPAKLIATPILFLGGMGFMHMDERT------QQFDVPEKLPFCGLQMKPEYVDFGFLNBEGESEKLSPEELERMI : 563

Haa_SF3B1 : MKLLTKNGSPARKALROITDKAEFGAGPLFNGILPLLASPELEDOERHLVKVDDRILYKLDLVRP VHKILVVEP LLEDEDIYARVEGERIISNLAKAAGLATMISTWRPDI : 617
Dme_SF3B1 : MKLLTKNGSPARKSLROITDKAEFGAGPLFNGILPLLASPELEDOERHLVKVDDRILYKLDLVRP VHKILVVEP LLEDEDIYARVEGERIISNLAKAAGLATMISTWRPDI : 653
Cel_1_SF3B1 : MEHLTKNGSPARKALROITDKAEFGAGPLFNGILPLLASPELEDOERHLVKVDDRILYKLDLVRP VHKILVVEP LLEDEDIYARVEGERIISNLAKAAGLATMISTWRPDI : 635
Ani_1_SF3B1 : MRLLTKNGSPARKALROITDKAEFGAGPLFNGILPLLASPELEDOERHLVKVDDRILYKLDLVRP VHKILVVEP LLEDEDIYARVEGERIISNLAKAAGLATMISTWRPDI : 540
Osa_1_SF3B1 : LKLEFRKNGSPARKALROITDKAEFGAGPLFNGILPLLASPELEDOERHLVKVDDRILYKLDLVRP VHKILVVEP LLEDEDIYARVEGERIISNLAKAAGLATMISTWRPDI : 683

Haa_SF3B1 : DNWDEAVNVTARAFVVA SNLGIFSLPFLAVCKSKSOWARHC KLVQOALMCGCALPHSRVSEIIEHGVDEQKVRTSALALALABAIPYGIESFDSVLKPLMGLIQ : 737
Dme_SF3B1 : DNWDEAVNVTARAFVVA SNLGIFSLPFLAVCKSKSOWARHC KLVQOALMCGCALPHSRVSEIIEHGVDEQKVRTSALALALABAIPYGIESFDSVLKPLMGLIQ : 773
Cel_1_SF3B1 : MEHLTKNGSPARKALROITDKAEFGAGPLFNGILPLLASPELEDOERHLVKVDDRILYKLDLVRP VHKILVVEP LLEDEDIYARVEGERIISNLAKAAGLATMISTWRPDI : 755
Ani_1_SF3B1 : DNWDEAVNVTARAFVVA SNLGIFSLPFLAVCKSKSOWARHC KLVQOALMCGCALPHSRVSEIIEHGVDEQKVRTSALALALABAIPYGIESFDSVLKPLMGLIQ : 660
Osa_1_SF3B1 : DNWDEAVNVTARAFVVA SNLGIFSLPFLAVCKSKSOWARHC KLVQOALMCGCALPHSRVSEIIEHGVDEQKVRTSALALALABAIPYGIESFDSVLKPLMGLIQ : 803

Haa_SF3B1 : HRGSLAAFLKAGLIPLMDAEVANYTIEVALILREFCSPDEEMKVLKVIQCCCTGVEANVYKTEILPEFFHFVORHMAIDRRNYQIVDTTVEIPANKVGAEEISRIVDIL : 857
Dme_SF3B1 : HRGSLAAFLKAGLIPLMDAEVANYTIEVALILREFCSPDEEMKVLKVIQCCCTGVEANVYKTEILPEFFHFVORHMAIDRRNYQIVDTTVEIPANKVGAEEISRIVDIL : 893
Cel_1_SF3B1 : HRGSLAAFLKAGLIPLMDAEVANYTIEVALILREFCSPDEEMKVLKVIQCCCTGVEANVYKTEILPEFFHFVORHMAIDRRNYQIVDTTVEIPANKVGAEEISRIVDIL : 875
Ani_1_SF3B1 : HRGSLAAFLKAGLIPLMDAEVANYTIEVALILREFCSPDEEMKVLKVIQCCCTGVEANVYKTEILPEFFHFVORHMAIDRRNYQIVDTTVEIPANKVGAEEISRIVDIL : 780
Osa_1_SF3B1 : HRGSLAAFLKAGLIPLMDAEVANYTIEVALILREFCSPDEEMKVLKVIQCCCTGVEANVYKTEILPEFFHFVORHMAIDRRNYQIVDTTVEIPANKVGAEEISRIVDIL : 923

Haa_SF3B1 : KDPAEORRQVMEHEHEDMGNIGADHDHKEBOLLELCIYAFORQITDS-MLGFTVTVALCKRKPFPPOICGIVMLINKSAVROAADLISRVAVMVTCCEKLMGHICV : 976
Dme_SF3B1 : KDNPEORRQVMEHEHEDMGNIGADHDHKEBOLLELCIYAFORQITDS-MLGFTVTVALCKRKPFPPOICGIVMLINKSAVROAADLISRVAVMVTCCEKLMGHICV : 1012
Cel_1_SF3B1 : KDNPEORRQVMEHEHEDMGNIGADHDHKEBOLLELCIYAFORQITDS-MLGFTVTVALCKRKPFPPOICGIVMLINKSAVROAADLISRVAVMVTCCEKLMGHICV : 994
Ani_1_SF3B1 : KDSSEPRKRVMEHEHEDMGNIGADHDHKEBOLLELCIYAFORQITDS-MLGFTVTVALCKRKPFPPOICGIVMLINKSAVROAADLISRVAVMVTCCEKLMGHICV : 899
Osa_1_SF3B1 : KDSSEPRKRVMEHEHEDMGNIGADHDHKEBOLLELCIYAFORQITDS-MLGFTVTVALCKRKPFPPOICGIVMLINKSAVROAADLISRVAVMVTCCEKLMGHICV : 1043

Haa_SF3B1 : VLVEPLGEEYPEVLGSLGALKALVAVIGMHTMPPIDLLPRLTPTIKNRHEKVOBNCIDLVRGADRCAEVSAREWIRIGFELLEPKAKHKAIRRAVNTVFCILAKAIGPHDVLAT : 1096
Dme_SF3B1 : VLVEPLGEEYPEVLGSLGALKALVAVIGMHTMPPIDLLPRLTPTIKNRHEKVOBNCIDLVRGADRCAEVSAREWIRIGFELLEPKAKHKAIRRAVNTVFCILAKAIGPHDVLAT : 1132
Cel_1_SF3B1 : VLVEPLGEEYPEVLGSLGALKALVAVIGMHTMPPIDLLPRLTPTIKNRHEKVOBNCIDLVRGADRCAEVSAREWIRIGFELLEPKAKHKAIRRAVNTVFCILAKAIGPHDVLAT : 1114
Ani_1_SF3B1 : VLVEPLGEEYPEVLGSLGALKALVAVIGMHTMPPIDLLPRLTPTIKNRHEKVOBNCIDLVRGADRCAEVSAREWIRIGFELLEPKAKHKAIRRAVNTVFCILAKAIGPHDVLAT : 1019
Osa_1_SF3B1 : VLVEPLGEEYPEVLGSLGALKALVAVIGMHTMPPIDLLPRLTPTIKNRHEKVOBNCIDLVRGADRCAEVSAREWIRIGFELLEPKAKHKAIRRAVNTVFCILAKAIGPHDVLAT : 1163

Haa_SF3B1 : LLNNLVAQERQNRVCTVAIVAEICSPFTVLPALMNEVRVPEHNVONGVLALESFPEYIGEMGKDYIYAVTPLEDALMDRDVHRQVFAVAICMSLGVVYFCGCBESHLNLYYW : 1216
Dme_SF3B1 : LLNNLVAQERQNRVCTVAIVAEICSPFTVLPALMNEVRVPEHNVONGVLALESFPEYIGEMGKDYIYAVTPLEDALMDRDVHRQVFAVAICMSLGVVYFCGCBESHLNLYYW : 1252
Cel_1_SF3B1 : LLNNLVAQERQNRVCTVAIVAEICSPFTVLPALMNEVRVPEHNVONGVLALESFPEYIGEMGKDYIYAVTPLEDALMDRDVHRQVFAVAICMSLGVVYFCGCBESHLNLYYW : 1234
Ani_1_SF3B1 : LLNNLVAQERQNRVCTVAIVAEICSPFTVLPALMNEVRVPEHNVONGVLALESFPEYIGEMGKDYIYAVTPLEDALMDRDVHRQVFAVAICMSLGVVYFCGCBESHLNLYYW : 1139
Osa_1_SF3B1 : LLNNLVAQERQNRVCTVAIVAEICSPFTVLPALMNEVRVPEHNVONGVLALESFPEYIGEMGKDYIYAVTPLEDALMDRDVHRQVFAVAICMSLGVVYFCGCBESHLNLYYW : 1282

```

■ U2AF65 binding  
■ p14 binding  
■ HEAT

Supplementary Figure 2. Multiple sequence alignment of SF3B1 from representative eukaryotic species. Conserved residues are shaded. Mutated residues are highlighted in red. Hsa, *Homo sapiens*; Dme, *Drosophila melanogaster*; Cel, *Caenorhabditis elegans*; Ani, *Aspergillus nidulans*; Osa, *Oryza sativa*.

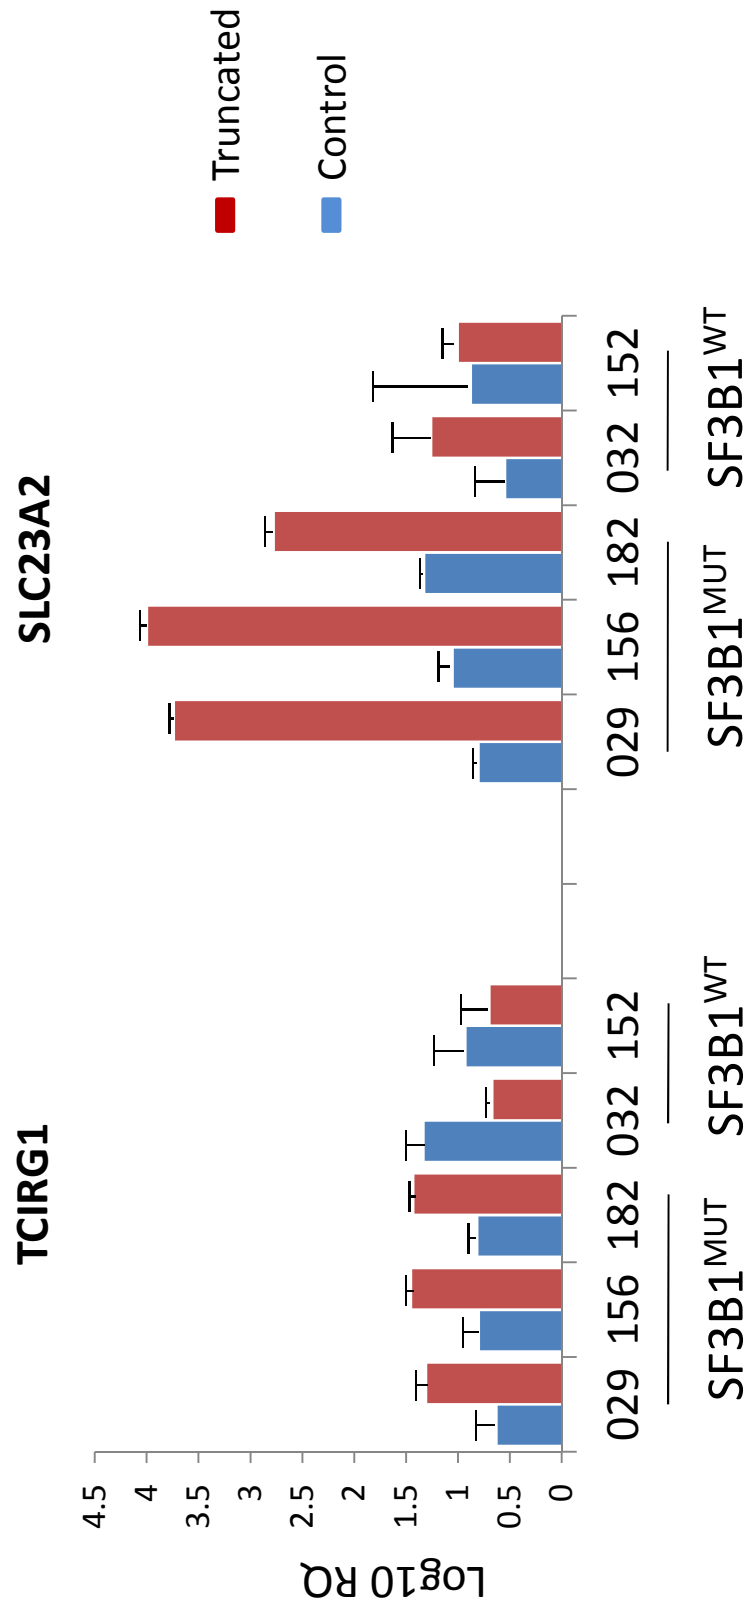

**Supplementary Figure 3. Novel splicing forms in *TCIRG1* and *SLC23A2* associated with mutations in *SF3B1*.** Comparison of three *SF3B1*-mutated cases with two *SF3B1*-unmutated cases by quantitative RT-PCR. Error bars represent standard deviations.

**Supplementary Table 1.** Clinical features of the patients

| Variable                                          | Category       |                    |
|---------------------------------------------------|----------------|--------------------|
| Sex                                               | Male /Female   | 68 / 37            |
| Age, median (range)                               |                | 62 (34-93) years   |
| Clinical status at sampling                       | Stable disease | 51/105 (49%)       |
|                                                   | Progression    | 54/105 (51%)       |
| Binet stage                                       | A              | 97 (92%)           |
|                                                   | B              | 6 (6%)             |
|                                                   | C              | 2 (2%)             |
| Rai stage                                         | 0              | 65 (62%)           |
|                                                   | I-II           | 37 (35%)           |
| Binet stage (at sampling time)*                   | III-IV         | 3 (3%)             |
|                                                   | A              | 58 (57%)           |
| Rai stage (at sampling time)*                     | B              | 29 (28%)           |
|                                                   | C              | 15 (15%)           |
|                                                   | 0              | 40 (39%)           |
| Lymphocytes (x10 <sup>9</sup> /L), median (range) | I-II           | 44 (43%)           |
|                                                   | III-IV         | 18 (18%)           |
| Hemoglobin (g/L), median (range)                  |                | 13 (2.6-80)        |
| Platelets (x10 <sup>9</sup> /L), median (range)   |                | 140 (93-175)       |
| LDH                                               | >UNL           | 204 (21-470)       |
| β <sub>2</sub> -microglobulin                     | >UNL           | 8/100 (8%)         |
| Lymphocyte doubling time                          | < 1 year       | 25/92 (27%)        |
| CD38                                              | High           | 15/84 (18%)        |
| ZAP-70                                            | High           | 26/100 (26%)       |
| IGHV                                              | Unmutated      | 28/97 (29%)        |
|                                                   | del(13)(q14.3) | 45/105 (43%)       |
|                                                   | del(11)(q22.3) | 50/104 (48%)       |
|                                                   | 12             | 14/104 (14%)       |
|                                                   | del(17)(p13.1) | 10/104 (10%)       |
| Genetic abnormality (at sampling time)            |                | 1/104 (1%)         |
| 10-year time PFS (95% CI)                         | Binet stage A  | 46% (34-58)        |
| 10-year OS (95% CI)                               | All            | 82% (73-91)        |
| Follow-up, median (range)                         | All            | 6.6 (0.6-23) years |

Clinical status at sampling: Stable disease (no criteria for therapy), progression (requiring therapy) (sampling always before starting treatment); CD38 high: ≥ 30% positive CLL cells; ZAP-70 high: ≥ 20% positive CLL cells; IGHV unmutated: ≥ 98% homology with germline; PFS: progression-free survival; OS: overall survival. \*Stage information was not available for three patients at sampling time.

**Supplementary Table 2.** Biological characteristics of the tumor samples

| Case | IGHV mutational status | NOTCH1     | SF3B1     | ZAP-70 | CD38 |
|------|------------------------|------------|-----------|--------|------|
| 005  | Unmutated              | Unmutated  | Unmutated | 64     | 20   |
| 006  | Unmutated              | Unmutated  | N626Y     | 77     | 100  |
| 007  | Mutated                | Unmutated  | Unmutated | 16     | 2    |
| 008  | Unmutated              | Unmutated  | Unmutated | 42     | 85   |
| 009  | Mutated                | Unmutated  | K700E     | 5      | 10   |
| 013  | Unmutated              | Unmutated  | Unmutated | 57     | 18   |
| 016  | Unmutated              | Unmutated  | Unmutated | 67     | 0    |
| 017  | Unmutated              | Unmutated  | Unmutated | 77     | 45   |
| 018  | Mutated                | Unmutated  | Unmutated | 13     | 0    |
| 019  | Mutated                | P2515Rfs*4 | V701F     | 10     | 88   |
| 020  | Unmutated              | Unmutated  | Unmutated | 44     | 44   |
| 022  | Unmutated              | Unmutated  | Unmutated | 42     | 32   |
| 023  | Unmutated              | Unmutated  | Unmutated | 18     | 90   |
| 027  | Unmutated              | Unmutated  | Unmutated | 1      | 0    |
| 029  | Unmutated              | Unmutated  | K700E     | 13     | 18   |
| 030  | Unmutated              | Unmutated  | Unmutated | 18     | 79   |
| 032  | Mutated                | Unmutated  | Unmutated | 1      | 97   |
| 033  | Mutated                | Unmutated  | Unmutated |        | 25   |
| 038  | Unmutated              | Unmutated  | Unmutated | 30     | 80   |
| 039  | Mutated                | Unmutated  | Unmutated | 0,4    | 2,5  |
| 040  | Mutated                | Unmutated  | Unmutated | 2      | 1    |
| 041  | Mutated                | Unmutated  | Unmutated | 36     | 11   |
| 042  | Unmutated              | Unmutated  | Unmutated | 14     | 13   |
| 043  | Mutated                | Unmutated  | Unmutated | 12     | 10   |
| 044  | Unmutated              | Unmutated  | Unmutated | 26     | 26   |
| 045  | Mutated                | Unmutated  | Unmutated | 9      | 91   |
| 048  | Unmutated              | P2515Rfs*4 | Unmutated | 65     | 98   |
| 049  | Unmutated              | Unmutated  | Unmutated | 63     | 1    |
| 051  | Mutated                | Unmutated  | Unmutated | 6      | 8    |
| 052  | Unmutated              | Unmutated  | Unmutated | 3      | 2    |
| 053  | Unmutated              | Unmutated  | T663I     | 21     | 18   |
| 054  | Unmutated              | Unmutated  | Unmutated | 25     | 98   |
| 063  | Unmutated              | Unmutated  | Unmutated | 7      | 87   |
| 064  | Mutated                | Unmutated  | Unmutated | 0,9    | 16   |
| 082  | Unmutated              | Unmutated  | Unmutated | 2      | 70   |
| 083  | Unmutated              | Unmutated  | D894G     | 60     | 97   |
| 090  | Mutated                | Unmutated  | Unmutated | 3      | 0    |
| 091  | Mutated                | Unmutated  | Unmutated | 4      | 14   |
| 100  | Unmutated              | Unmutated  | Unmutated | 39     | 48   |
| 110  | Mutated                | Unmutated  | Unmutated | 6      | 13   |
| 117  | Mutated                | Unmutated  | Unmutated | 7      | 8    |
| 124  | Mutated                | Unmutated  | Unmutated | 1      | 2    |
| 136  | Mutated                | Unmutated  | Unmutated | 1      | 5    |
| 141  | Unmutated              | Unmutated  | Unmutated | 24     | 87   |
| 144  | Mutated                | Unmutated  | Unmutated | 51,5   | 0    |

|     |           |            |           |     |     |
|-----|-----------|------------|-----------|-----|-----|
| 145 | Unmutated | Unmutated  | Unmutated | 8   | 99  |
| 146 | Mutated   | Unmutated  | Unmutated | 7   | 14  |
| 148 | Unmutated | Unmutated  | Unmutated | 48  | 90  |
| 152 | Mutated   | Unmutated  | Unmutated | 14  | 7   |
| 155 | Unmutated | Unmutated  | Unmutated | 0   | 0   |
| 156 | Mutated   | P2515Rfs*4 | K700E     | 0   | 54  |
| 157 | Unmutated | Unmutated  | Unmutated | 0   | 13  |
| 159 | Mutated   | Unmutated  | Unmutated | 1   | 1,5 |
| 165 | Mutated   | Unmutated  | Unmutated | 1   | 10  |
| 166 | Unmutated | Unmutated  | Unmutated | 84  | 90  |
| 168 | Mutated   | Unmutated  | Unmutated | 13  | 2   |
| 170 | Mutated   | Unmutated  | Unmutated | 1,5 | 2   |
| 171 | Mutated   | Unmutated  | Unmutated | 4   | 5   |
| 172 | Mutated   | Unmutated  | Unmutated | 3   | 10  |
| 173 | Mutated   | Unmutated  | Unmutated | 3   | 0   |
| 174 | Mutated   | Unmutated  | Unmutated | 4   | 2   |
| 175 | Mutated   | Unmutated  | Unmutated | 1,5 | 3   |
| 178 | Mutated   | Unmutated  | Unmutated |     | 94  |
| 181 | Mutated   | Unmutated  | Unmutated | 4   | 2   |
| 182 | Unmutated | Unmutated  | N626Y     | 18  | 21  |
| 184 | Unmutated | P2515Rfs*4 | Unmutated | 70  | 30  |
| 185 | Mutated   | Unmutated  | Unmutated | 1   | 0   |
| 186 | Unmutated | Unmutated  | Unmutated | 26  | 10  |
| 188 | Unmutated | Unmutated  | Unmutated | 14  | 1   |
| 189 | Mutated   | Unmutated  | Unmutated | 17  | 5   |
| 191 | Mutated   | Unmutated  | Unmutated | 0,3 | 0   |
| 192 | Mutated   | Unmutated  | Unmutated | 4   | 0   |
| 193 | Mutated   | Unmutated  | Unmutated | 14  | 4   |
| 194 | Mutated   | Unmutated  | Unmutated | 1   | 15  |
| 195 | Unmutated | Unmutated  | Unmutated | 70  | 3   |
| 197 | Mutated   | Unmutated  | G742D     | 2   | 16  |
| 264 | Mutated   | Unmutated  | Unmutated | 1   | 16  |
| 266 | Mutated   | Unmutated  | Unmutated | 0   | 2   |
| 267 | Mutated   | Unmutated  | Unmutated | 3   | 5   |
| 270 | Unmutated | Unmutated  | Unmutated | 9   | 8   |
| 272 | Mutated   | Unmutated  | Unmutated | 12  | 4   |
| 273 | Mutated   | Unmutated  | Unmutated | 1   | 1   |
| 274 | Mutated   | Unmutated  | Unmutated | 8   | 0   |
| 275 | Unmutated | Unmutated  | Unmutated | 70  | 10  |
| 276 | Mutated   | Unmutated  | Unmutated | 14  | 0   |
| 278 | Unmutated | Unmutated  | Unmutated | 11  | 1   |
| 279 | Unmutated | Unmutated  | Unmutated | 19  | 20  |
| 280 | Mutated   | Unmutated  | Unmutated | 2   | 8   |
| 282 | Unmutated | Unmutated  | Unmutated | 50  | 2   |
| 290 | Unmutated | Unmutated  | Unmutated | 25  | 98  |
| 319 | Mutated   | Unmutated  | Unmutated |     |     |
| 321 | Unmutated | P2515Rfs*4 | Unmutated | 0   | 29  |
| 322 | Mutated   | Unmutated  | Unmutated |     |     |
| 323 | Mutated   | Unmutated  | Unmutated | 0   | 0   |
| 324 | Mutated   |            | Unmutated |     |     |



|     |           |           |           |     |      |
|-----|-----------|-----------|-----------|-----|------|
| 325 | Unmutated | Unmutated | Unmutated |     |      |
| 326 | Unmutated | Unmutated | Unmutated |     | 0    |
| 328 | Mutated   | Unmutated | Unmutated |     |      |
| 375 | Mutated   | Unmutated | Unmutated | 0,9 | 0,35 |
| 618 | Mutated   | Unmutated | Unmutated | 17  | 0    |
| 642 | Mutated   | Unmutated | Unmutated | 1   | 2    |
| 680 | Mutated   | Unmutated | Unmutated | 29  | 26   |
| 758 | Mutated   | Unmutated | K700E     | 14  | 28   |
| 761 | Unmutated | Unmutated | Unmutated | 8   | 47   |
| 785 | Mutated   | Unmutated | Unmutated | 14  | 3    |

**Supplementary Table 3.** Statistics for whole-exome sequencing

| Case | Sample | Number of reads mapped | Depth | Coverage | Cov. $\geq 10$ |
|------|--------|------------------------|-------|----------|----------------|
| 005  | Normal | 53717781               | 57    | 97.40%   | 88.5%          |
|      | Tumor  | 59238351               | 62    | 97.60%   | 89.2%          |
| 006  | Normal | 59756858               | 61    | 97.20%   | 88.7%          |
|      | Tumor  | 56627266               | 57    | 97.50%   | 89.2%          |
| 007  | Normal | 54734688               | 59    | 97.50%   | 87.9%          |
|      | Tumor  | 56808871               | 59    | 97.60%   | 88.8%          |
| 008  | Normal | 55941286               | 59    | 96.60%   | 86.9%          |
|      | Tumor  | 55259258               | 61    | 97.60%   | 89.0%          |
| 009  | Normal | 60605942               | 62    | 97.80%   | 89.3%          |
|      | Tumor  | 58515451               | 59    | 97.60%   | 89.0%          |
| 013  | Normal | 61943019               | 64    | 97.20%   | 89.0%          |
|      | Tumor  | 63144498               | 67    | 97.10%   | 88.3%          |
| 016  | Normal | 100132780              | 131   | 85.30%   | 79.3%          |
|      | Tumor  | 96631049               | 125   | 85.20%   | 79.4%          |
| 017  | Normal | 57200757               | 60    | 97.60%   | 89.4%          |
|      | Tumor  | 48334046               | 57    | 97.50%   | 88.7%          |
| 018  | Normal | 55310757               | 58    | 97.80%   | 88.9%          |
|      | Tumor  | 62114147               | 64    | 97.50%   | 88.5%          |
| 019  | Normal | 57997219               | 63    | 97.40%   | 87.9%          |
|      | Tumor  | 58655271               | 61    | 97.70%   | 89.4%          |
| 020  | Normal | 60747151               | 64    | 97.60%   | 89.6%          |
|      | Tumor  | 59051980               | 61    | 97.60%   | 89.7%          |
| 022  | Normal | 58181093               | 61    | 97.40%   | 89.2%          |
|      | Tumor  | 58761948               | 61    | 97.30%   | 88.8%          |
| 023  | Normal | 60290894               | 62    | 97.70%   | 89.6%          |
|      | Tumor  | 53940646               | 59    | 97.10%   | 87.8%          |
| 027  | Normal | 60857180               | 62    | 97.70%   | 90.1%          |
|      | Tumor  | 62882050               | 63    | 97.20%   | 87.8%          |
| 029  | Normal | 59032114               | 60    | 97.70%   | 89.5%          |
|      | Tumor  | 63058990               | 64    | 97.30%   | 89.1%          |
| 030  | Normal | 60322038               | 60    | 97.60%   | 88.8%          |
|      | Tumor  | 63698075               | 65    | 97.30%   | 88.1%          |
| 032  | Normal | 67107448               | 66    | 97.40%   | 88.7%          |
|      | Tumor  | 60843934               | 63    | 97.70%   | 89.0%          |
| 033  | Normal | 59752194               | 60    | 97.50%   | 88.3%          |
|      | Tumor  | 40224131               | 41    | 95.30%   | 82.4%          |
| 038  | Normal | 64263020               | 65    | 97.60%   | 89.1%          |
|      | Tumor  | 64058844               | 65    | 97.50%   | 88.9%          |
| 039  | Normal | 52591525               | 53    | 97.40%   | 88.0%          |
|      | Tumor  | 66444563               | 66    | 97.10%   | 87.1%          |
| 040  | Normal | 53413657               | 54    | 97.40%   | 87.9%          |
|      | Tumor  | 57471264               | 58    | 97.40%   | 88.8%          |
| 041  | Normal | 61880545               | 64    | 97.60%   | 89.4%          |
|      | Tumor  | 59912603               | 61    | 97.40%   | 88.5%          |
| 042  | Normal | 59125142               | 58    | 97.10%   | 86.7%          |
|      | Tumor  | 57857463               | 59    | 97.40%   | 88.0%          |

|     |        |          |    |        |       |
|-----|--------|----------|----|--------|-------|
| 043 | Normal | 40833305 | 48 | 97.00% | 86.5% |
|     | Tumor  | 57639174 | 59 | 97.40% | 88.1% |
| 044 | Normal | 62362894 | 63 | 97.70% | 89.3% |
|     | Tumor  | 58962155 | 59 | 97.60% | 88.8% |
| 045 | Normal | 62843286 | 65 | 97.30% | 89.5% |
|     | Tumor  | 62599964 | 64 | 97.30% | 89.0% |
| 048 | Normal | 59775498 | 64 | 96.90% | 86.4% |
|     | Tumor  | 54564216 | 58 | 97.30% | 87.8% |
| 049 | Normal | 61163114 | 64 | 97.50% | 89.3% |
|     | Tumor  | 59511868 | 61 | 97.30% | 88.8% |
| 051 | Normal | 64713633 | 67 | 97.10% | 87.9% |
|     | Tumor  | 61218409 | 64 | 97.60% | 89.3% |
| 052 | Normal | 58002379 | 61 | 97.50% | 88.6% |
|     | Tumor  | 53489476 | 57 | 97.40% | 87.9% |
| 053 | Normal | 61732639 | 63 | 97.70% | 90.1% |
|     | Tumor  | 62763508 | 67 | 97.50% | 88.8% |
| 054 | Normal | 57003861 | 58 | 97.30% | 88.4% |
|     | Tumor  | 61827623 | 64 | 97.20% | 88.7% |
| 063 | Normal | 60381172 | 64 | 97.60% | 89.6% |
|     | Tumor  | 53128282 | 55 | 97.80% | 89.4% |
| 064 | Normal | 59743847 | 62 | 97.60% | 89.5% |
|     | Tumor  | 55685113 | 57 | 97.60% | 88.5% |
| 082 | Normal | 52268280 | 56 | 97.00% | 87.4% |
|     | Tumor  | 63595364 | 66 | 97.00% | 87.6% |
| 083 | Normal | 53232286 | 57 | 97.20% | 88.1% |
|     | Tumor  | 60339913 | 63 | 97.20% | 88.5% |
| 090 | Normal | 56830982 | 60 | 97.40% | 89.0% |
|     | Tumor  | 57647029 | 61 | 97.00% | 88.1% |
| 091 | Normal | 55143096 | 59 | 97.50% | 89.9% |
|     | Tumor  | 62483620 | 66 | 97.00% | 87.6% |
| 100 | Normal | 53006576 | 58 | 97.70% | 89.5% |
|     | Tumor  | 61816215 | 66 | 97.10% | 87.7% |
| 110 | Normal | 62336370 | 65 | 97.20% | 89.1% |
|     | Tumor  | 61862080 | 65 | 96.90% | 87.7% |
| 117 | Normal | 50722217 | 53 | 97.00% | 87.2% |
|     | Tumor  | 59237338 | 60 | 97.20% | 88.0% |
| 124 | Normal | 63588439 | 65 | 97.50% | 89.2% |
|     | Tumor  | 59057669 | 62 | 97.50% | 89.1% |
| 136 | Normal | 63828805 | 69 | 96.80% | 87.7% |
|     | Tumor  | 63753438 | 66 | 97.20% | 88.4% |
| 141 | Normal | 59931810 | 62 | 97.50% | 88.8% |
|     | Tumor  | 57202992 | 60 | 97.40% | 88.0% |
| 144 | Normal | 63616079 | 65 | 97.60% | 88.9% |
|     | Tumor  | 60153070 | 61 | 97.40% | 88.1% |
| 145 | Normal | 58570386 | 62 | 97.30% | 88.6% |
|     | Tumor  | 57642285 | 62 | 97.60% | 89.1% |
| 146 | Normal | 59552541 | 63 | 97.50% | 89.0% |
|     | Tumor  | 62139557 | 67 | 97.60% | 89.5% |
| 148 | Normal | 72715382 | 80 | 97.60% | 89.9% |
|     | Tumor  | 58166761 | 61 | 97.90% | 90.0% |

|     |        |          |    |        |        |
|-----|--------|----------|----|--------|--------|
| 152 | Normal | 56213419 | 59 | 97.90% | 90.1%  |
|     | Tumor  | 49302140 | 53 | 97.70% | 89.6%  |
| 155 | Normal | 51727153 | 56 | 97.50% | 89.0%  |
|     | Tumor  | 60802199 | 66 | 97.40% | 89.1%  |
| 156 | Normal | 78114226 | 82 | 97.50% | 89.3%  |
|     | Tumor  | 40919535 | 44 | 97.70% | 88.0%  |
| 157 | Normal | 62939680 | 66 | 97.90% | 90.70% |
|     | Tumor  | 62263826 | 67 | 97.80% | 90.90% |
| 159 | Normal | 55080126 | 58 | 97.70% | 89.40% |
|     | Tumor  | 57245641 | 62 | 97.40% | 88.10% |
| 165 | Normal | 50610537 | 52 | 97.40% | 88.40% |
|     | Tumor  | 51913777 | 56 | 97.50% | 89.40% |
| 166 | Normal | 47943642 | 49 | 97.00% | 86.70% |
|     | Tumor  | 50297712 | 54 | 97.70% | 88.20% |
| 168 | Normal | 59888030 | 61 | 97.70% | 89.00% |
|     | Tumor  | 64947770 | 64 | 97.50% | 89.80% |
| 170 | Normal | 60657128 | 68 | 97.30% | 87.90% |
|     | Tumor  | 62590312 | 69 | 97.10% | 87.20% |
| 171 | Normal | 50958302 | 53 | 97.10% | 87.10% |
|     | Tumor  | 48620622 | 55 | 97.00% | 86.90% |
| 172 | Normal | 52512304 | 54 | 97.40% | 88.00% |
|     | Tumor  | 49481425 | 53 | 97.10% | 87.80% |
| 173 | Normal | 53456012 | 54 | 97.60% | 88.40% |
|     | Tumor  | 63007729 | 70 | 97.30% | 88.00% |
| 174 | Normal | 49000882 | 49 | 97.30% | 88.20% |
|     | Tumor  | 58804984 | 57 | 97.50% | 88.80% |
| 175 | Normal | 54233281 | 57 | 97.60% | 88.80% |
|     | Tumor  | 53139627 | 58 | 97.70% | 88.90% |
| 178 | Normal | 58716794 | 63 | 97.70% | 89.60% |
|     | Tumor  | 50485234 | 53 | 97.50% | 88.20% |
| 181 | Normal | 53840639 | 57 | 97.60% | 88.60% |
|     | Tumor  | 53790387 | 57 | 97.70% | 89.00% |
| 182 | Normal | 52272456 | 56 | 97.70% | 89.80% |
|     | Tumor  | 42695862 | 40 | 97.40% | 85.50% |
| 184 | Normal | 56842387 | 61 | 98.00% | 90.90% |
|     | Tumor  | 67812616 | 72 | 98.10% | 90.90% |
| 185 | Normal | 69469540 | 71 | 97.80% | 90.20% |
|     | Tumor  | 49186172 | 57 | 97.70% | 90.00% |
| 186 | Normal | 57466878 | 60 | 97.90% | 90.20% |
|     | Tumor  | 57666748 | 62 | 97.70% | 90.30% |
| 188 | Normal | 63758567 | 64 | 97.60% | 89.50% |
|     | Tumor  | 60959293 | 64 | 97.30% | 88.90% |
| 189 | Normal | 63146282 | 63 | 97.00% | 88.40% |
|     | Tumor  | 59302580 | 60 | 97.00% | 87.80% |
| 191 | Normal | 65762885 | 69 | 97.90% | 90.40% |
|     | Tumor  | 53500566 | 61 | 97.70% | 90.20% |
| 192 | Normal | 36260479 | 44 | 97.50% | 88.40% |
|     | Tumor  | 74879197 | 78 | 97.50% | 90.40% |
| 193 | Normal | 62844879 | 63 | 96.80% | 87.60% |
|     | Tumor  | 51953554 | 55 | 96.90% | 87.70% |

|     |        |          |    |        |        |
|-----|--------|----------|----|--------|--------|
| 194 | Normal | 60762734 | 63 | 97.00% | 88.40% |
|     | Tumor  | 60679454 | 62 | 96.90% | 88.30% |
| 195 | Normal | 69064237 | 74 | 97.90% | 90.60% |
|     | Tumor  | 74020561 | 80 | 98.20% | 92.90% |
| 197 | Normal | 57500804 | 64 | 97.60% | 90.30% |
|     | Tumor  | 67337694 | 70 | 97.40% | 90.40% |
| 264 | Normal | 67688335 | 76 | 97.90% | 91.00% |
|     | Tumor  | 45032303 | 53 | 97.90% | 89.90% |
| 266 | Normal | 46682286 | 55 | 97.90% | 90.40% |
|     | Tumor  | 59185829 | 68 | 97.70% | 90.30% |
| 267 | Normal | 74254940 | 74 | 97.70% | 90.10% |
|     | Tumor  | 69609754 | 74 | 97.80% | 90.90% |
| 270 | Normal | 57103246 | 65 | 97.90% | 90.50% |
|     | Tumor  | 71804250 | 76 | 97.90% | 90.90% |
| 272 | Normal | 60643107 | 63 | 97.70% | 90.40% |
|     | Tumor  | 57024005 | 60 | 97.50% | 89.30% |
| 273 | Normal | 65944135 | 69 | 97.80% | 90.50% |
|     | Tumor  | 69152356 | 72 | 97.90% | 90.70% |
| 274 | Normal | 77822287 | 81 | 97.20% | 89.10% |
|     | Tumor  | 53762072 | 62 | 97.70% | 89.90% |
| 275 | Normal | 69022253 | 69 | 97.50% | 90.50% |
|     | Tumor  | 56194776 | 61 | 97.70% | 90.10% |
| 276 | Normal | 68465274 | 71 | 98.00% | 90.80% |
|     | Tumor  | 67477376 | 72 | 97.90% | 90.60% |
| 278 | Normal | 69027081 | 71 | 98.10% | 90.70% |
|     | Tumor  | 65688812 | 70 | 97.90% | 90.80% |
| 279 | Normal | 69759299 | 76 | 98.10% | 91.70% |
|     | Tumor  | 72194501 | 75 | 97.60% | 90.50% |
| 280 | Normal | 62826127 | 63 | 96.80% | 87.70% |
|     | Tumor  | 66321483 | 67 | 97.20% | 88.80% |
| 282 | Normal | 49234680 | 50 | 97.30% | 87.90% |
|     | Tumor  | 56083825 | 57 | 97.20% | 88.30% |
| 290 | Normal | 61987314 | 64 | 97.30% | 89.10% |
|     | Tumor  | 59423536 | 61 | 97.20% | 89.20% |
| 319 | Normal | 52558321 | 53 | 97.90% | 89.40% |
|     | Tumor  | 37574677 | 39 | 97.70% | 86.70% |
| 321 | Normal | 46117028 | 49 | 97.40% | 88.80% |
|     | Tumor  | 54668728 | 55 | 97.40% | 88.90% |
| 322 | Normal | 45039378 | 48 | 97.90% | 88.60% |
|     | Tumor  | 49538770 | 52 | 97.70% | 88.90% |
| 323 | Normal | 62289392 | 64 | 97.60% | 90.30% |
|     | Tumor  | 60899478 | 64 | 97.70% | 90.10% |
| 324 | Normal | 59678081 | 60 | 97.60% | 89.40% |
|     | Tumor  | 55187765 | 58 | 97.60% | 89.70% |
| 325 | Normal | 62147834 | 64 | 97.20% | 88.80% |
|     | Tumor  | 57957790 | 63 | 97.30% | 89.10% |
| 326 | Normal | 70135169 | 69 | 97.80% | 90.40% |
|     | Tumor  | 39917823 | 45 | 96.70% | 85.90% |
| 328 | Normal | 60612086 | 65 | 97.90% | 90.80% |
|     | Tumor  | 50151522 | 61 | 97.70% | 90.10% |

|     |        |          |    |        |        |
|-----|--------|----------|----|--------|--------|
| 375 | Normal | 74615242 | 78 | 98.00% | 91.20% |
|     | Tumor  | 58887793 | 61 | 98.00% | 90.30% |
| 618 | Normal | 54873020 | 58 | 97.80% | 89.90% |
|     | Tumor  | 61769937 | 66 | 97.60% | 89.70% |
| 642 | Normal | 56110386 | 59 | 97.50% | 89.60% |
|     | Tumor  | 63124269 | 65 | 97.40% | 90.10% |
| 680 | Normal | 59002206 | 63 | 97.40% | 89.40% |
|     | Tumor  | 57915382 | 61 | 97.70% | 89.60% |
| 758 | Normal | 55111696 | 60 | 97.40% | 88.50% |
|     | Tumor  | 55438717 | 58 | 97.70% | 88.70% |
| 761 | Normal | 58047340 | 62 | 97.60% | 89.10% |
|     | Tumor  | 49050366 | 52 | 97.60% | 88.40% |
| 785 | Normal | 55016679 | 61 | 97.50% | 88.90% |
|     | Tumor  | 56350701 | 57 | 97.60% | 88.90% |

**Supplementary Table 5.** Somatic mutations in CLL with predicted functional consequences

| Case | Symbol     | Mutation Type  | Effect | Chr | Position  | Ref | Obs    |
|------|------------|----------------|--------|-----|-----------|-----|--------|
| 144  | A2BP1      | non_synonymous | E194D  | 16  | 7645604   | G   | S      |
| 375  | A2ML1      | non_synonymous | N1402D | 12  | 9021782   | A   | R      |
| 043  | AAMP       | non_synonymous | C283S  | 2   | 219130588 | C   | S      |
| 043  | AAMP       | non_synonymous | D282A  | 2   | 219130591 | T   | K      |
| 159  | ABCA12     | non_synonymous | P376T  | 2   | 215891598 | G   | K      |
| 279  | ABCA13     | non_synonymous | A1262S | 7   | 48313047  | G   | K      |
| 157  | ABCA4      | non_synonymous | P1342L | 1   | 94497437  | G   | R      |
| 185  | ABCA4      | non_synonymous | S2213F | 1   | 94463508  | G   | R      |
| 029  | ABCB5      | non_synonymous | A877T  | 7   | 20766666  | G   | R      |
| 181  | ABCC11     | non_synonymous | S294Y  | 16  | 48250095  | G   | K      |
| 019  | ABCD1      | non_synonymous | S606P  | X   | 153008476 | T   | Y      |
| 157  | ABCD2      | non_synonymous | E374G  | 12  | 40001516  | T   | Y      |
| 159  | ABCE1      | non_synonymous | E307V  | 4   | 146038564 | A   | W      |
| 013  | ABHD12     | non_synonymous | G392S  | 20  | 25275650  | C   | Y      |
| 175  | ABHD13     | non_synonymous | S221N  | 13  | 108882228 | G   | R      |
| 321  | ABI3BP     | non_synonymous | R1065H | 3   | 100535588 | C   | Y      |
| 165  | ABR        | non_synonymous | V510I  | 17  | 959308    | C   | Y      |
| 090  | AC005921.3 | frameshift     | D386fs | 17  | 48827881  | *   | +A     |
| 172  | AC008026.2 | non_synonymous | D47G   | 17  | 60460324  | A   | R      |
| 680  | AC008749.3 | non_synonymous | T277S  | 19  | 56284511  | C   | S      |
| 278  | AC010201.1 | non_synonymous | R14I   | 12  | 89893910  | G   | K      |
| 194  | AC010974.2 | non_synonymous | K183R  | 2   | 133721324 | T   | Y      |
| 019  | AC011467.2 | non_synonymous | R103W  | 19  | 22785450  | C   | Y      |
| 680  | AC012555.1 | non_synonymous | R249C  | 12  | 104255962 | G   | R      |
| 053  | AC013486.2 | splicing-site  | -      | 15  | 74363379  | G   | M      |
| 006  | AC022415.3 | non_synonymous | T185N  | 19  | 12155803  | G   | K      |
| 270  | AC023886.1 | non_synonymous | H129Y  | 4   | 113506879 | G   | R      |
| 022  | AC025016.1 | non_synonymous | D130Y  | 11  | 5989019   | C   | M      |
| 172  | AC069029.1 | non_synonymous | V95M   | 15  | 99512742  | C   | Y      |
| 680  | AC084121.1 | non_synonymous | T58S   | 8   | 7627164   | A   | W      |
| 680  | AC091435.2 | frameshift     | L228fs | 5   | 38820752  | *   | -AAAGA |
| 267  | AC092070.5 | non_synonymous | T118K  | 19  | 53786091  | C   | M      |
| 172  | AC093331.1 | non_synonymous | A69S   | 8   | 86556495  | C   | M      |
| 182  | AC093331.1 | non_synonymous | N159K  | 8   | 86556223  | G   | S      |
| 043  | AC093844.4 | non_synonymous | V137I  | 4   | 184243171 | C   | Y      |
| 172  | AC099489.1 | non_synonymous | D279G  | 16  | 11544661  | T   | Y      |
| 680  | AC104758.5 | non_synonymous | L82P   | 15  | 78233849  | A   | A      |
| 048  | AC104819.1 | non_synonymous | V40I   | 4   | 152200977 | G   | R      |
| 182  | AC110754.1 | non_synonymous | Q941R  | 2   | 11750969  | A   | R      |
| 005  | AC111152.1 | non_synonymous | Q128*  | 15  | 30337208  | C   | Y      |
| 319  | AC126603.1 | non_synonymous | L66H   | 15  | 20468102  | A   | W      |
| 322  | AC128683.1 | non_synonymous | D997N  | 3   | 130292811 | G   | R      |
| 020  | AC131280.6 | non_synonymous | M242I  | 15  | 20776661  | G   | K      |
| 053  | AC135050.1 | non_synonymous | L175Q  | 16  | 31072905  | A   | C      |
| 152  | AC140658.4 | non_synonymous | R487W  | 16  | 33716978  | G   | R      |
| 191  | AC215219.4 | non_synonymous | V146M  | 12  | 87908     | G   | R      |

|     |             |                |        |    |           |   |   |
|-----|-------------|----------------|--------|----|-----------|---|---|
| 027 | ACACA       | non_synonymous | G355E  | 17 | 35627697  | C | Y |
| 117 | ACER1       | non_synonymous | Y75C   | 19 | 6312286   | T | Y |
| 054 | ACPT        | non_synonymous | D110G  | 19 | 51294938  | A | R |
| 053 | ADA         | splicing-site  | -      | 20 | 43264866  | T | M |
| 618 | ADAM18      | non_synonymous | P538T  | 8  | 39535036  | C | A |
| 013 | ADAM2       | non_synonymous | E181D  | 8  | 39666956  | T | W |
| 039 | ADAM2       | non_synonymous | L650V  | 8  | 39606897  | G | S |
| 016 | ADAM29      | non_synonymous | T746M  | 4  | 175898913 | C | Y |
| 013 | ADAMTS13    | non_synonymous | W669R  | 9  | 136310020 | T | W |
| 022 | ADAMTS18    | non_synonymous | R664C  | 16 | 77359805  | G | R |
| 033 | ADAMTS18    | non_synonymous | K528N  | 16 | 77387660  | T | K |
| 018 | ADAMTS20    | non_synonymous | L1001R | 12 | 43826201  | A | M |
| 278 | ADAMTS4     | non_synonymous | D320Y  | 1  | 161166093 | C | M |
| 642 | ADCY10      | non_synonymous | V676I  | 1  | 167825548 | C | Y |
| 758 | ADRBK1      | non_synonymous | M229V  | 11 | 67048967  | A | R |
| 144 | ADRBK2      | non_synonymous | S168C  | 22 | 26063766  | A | W |
| 148 | AFAP1       | non_synonymous | A681V  | 4  | 7776486   | G | R |
| 279 | AGAP6       | non_synonymous | K295N  | 10 | 51768770  | A | W |
| 090 | AGBL4       | non_synonymous | M15V   | 1  | 50317182  | T | Y |
| 272 | AHI1        | non_synonymous | T1034A | 6  | 135715923 | T | Y |
| 039 | AHNAK       | non_synonymous | N1026T | 11 | 62298812  | T | K |
| 184 | AK5         | non_synonymous | R257H  | 1  | 77806132  | G | R |
| 324 | AKAP12      | non_synonymous | E1311A | 6  | 151673458 | A | M |
| 192 | AKAP13      | non_synonymous | K809E  | 15 | 86123724  | A | R |
| 110 | AKAP6       | non_synonymous | T2288R | 14 | 33293882  | C | S |
| 189 | AKAP6       | non_synonymous | R943*  | 14 | 33147613  | C | Y |
| 758 | AKR1C4      | non_synonymous | R7C    | 10 | 5238849   | C | Y |
| 184 | AKT3        | non_synonymous | K172Q  | 1  | 243800960 | T | K |
| 032 | AL096711.2  | non_synonymous | A848T  | 6  | 127796629 | C | Y |
| 325 | AL353997.11 | splicing-site  | -      | 17 | 18332235  | G | R |
| 181 | AL929601.2  | non_synonymous | F47C   | 14 | 20085538  | T | K |
| 018 | ALDH1L2     | non_synonymous | M600I  | 12 | 105440551 | C | Y |
| 279 | ALK         | non_synonymous | V811M  | 2  | 29456487  | C | Y |
| 173 | ALS2CL      | non_synonymous | S650N  | 3  | 46718211  | C | Y |
| 270 | ALS2CL      | non_synonymous | A938E  | 3  | 46713130  | G | K |
| 171 | ALS2CR11    | non_synonymous | G540S  | 2  | 202400632 | C | Y |
| 168 | ALX1        | non_synonymous | Q198H  | 12 | 85680693  | A | W |
| 267 | AMDHD2      | non_synonymous | K120E  | 16 | 2571122   | A | R |
| 290 | AMZ2        | non_synonymous | P338L  | 17 | 66253040  | C | Y |
| 642 | ANKAR       | non_synonymous | V1111L | 2  | 190597863 | G | S |
| 276 | ANKRD17     | non_synonymous | L677P  | 4  | 74008412  | A | R |
| 090 | ANKRD40     | non_synonymous | R177W  | 17 | 48777009  | G | R |
| 375 | ANKRD61     | non_synonymous | F399L  | 7  | 6075957   | C | S |
| 054 | ANTXR1      | non_synonymous | K451N  | 2  | 69409792  | G | K |
| 146 | AOC2        | non_synonymous | G463S  | 17 | 40998030  | G | R |
| 159 | AP001011.3  | non_synonymous | D184G  | 18 | 2674057   | A | R |
| 159 | AP002478.3  | non_synonymous | S50P   | 18 | 3596987   | T | Y |
| 275 | AP003122.1  | non_synonymous | T33M   | 11 | 89487037  | G | R |
| 324 | AP003122.2  | non_synonymous | N131H  | 11 | 89499960  | T | K |
| 194 | AP004607.4  | non_synonymous | G255V  | 11 | 89719141  | C | M |



|     |          |                |        |    |           |   |     |
|-----|----------|----------------|--------|----|-----------|---|-----|
| 145 | AP2A2    | non_synonymous | V382M  | 11 | 988564    | G | R   |
| 006 | APH1B    | non_synonymous | T27I   | 15 | 63569902  | C | Y   |
| 375 | APOM     | non_synonymous | H152Y  | 6  | 31625413  | C | Y   |
| 043 | ARG1     | non_synonymous | F15L   | 6  | 131894467 | C | M   |
| 159 | ARHGAP20 | non_synonymous | Q892K  | 11 | 110450996 | G | K   |
| 013 | ARHGAP28 | non_synonymous | T715I  | 18 | 6898548   | C | Y   |
| 110 | ARHGAP28 | non_synonymous | A71T   | 18 | 6824849   | G | R   |
| 193 | ARHGEF17 | splicing-site  | -      | 11 | 73076433  | A | M   |
| 124 | ARID1A   | non_synonymous | P408L  | 1  | 27056227  | C | Y   |
| 178 | ARID1A   | non_synonymous | R1276* | 1  | 27099947  | C | Y   |
| 282 | ARNT2    | non_synonymous | H543R  | 15 | 80872766  | A | R   |
| 039 | ASAP1    | splicing-site  | -      | 8  | 131249242 | A | W   |
| 195 | ASTN1    | non_synonymous | P1108L | 1  | 176852058 | G | R   |
| 030 | ASXL1    | non_synonymous | E518*  | 20 | 31021553  | G | K   |
| 145 | ASXL1    | frameshift     | K686fs | 20 | 31022572  | * | -GT |
| 182 | ASXL1    | non_synonymous | K838*  | 20 | 31023027  | A | W   |
| 197 | ASXL3    | non_synonymous | N1746T | 18 | 31325049  | A | M   |
| 155 | ATBF1    | non_synonymous | A1099V | 16 | 72923782  | G | R   |
| 006 | ATM      | non_synonymous | L2033V | 11 | 108186739 | C | G   |
| 020 | ATM      | splicing-site  | -      | 11 | 108141874 | G | R   |
| 048 | ATM      | splicing-site  | -      | 11 | 108165652 | A | W   |
| 145 | ATM      | non_synonymous | A2626V | 11 | 108203577 | C | T   |
| 279 | ATP10B   | non_synonymous | T836I  | 5  | 160044890 | G | R   |
| 038 | ATP1A4   | non_synonymous | F401L  | 1  | 160136473 | T | W   |
| 040 | ATP1B2   | non_synonymous | R286C  | 17 | 7559196   | C | Y   |
| 124 | ATP2C2   | non_synonymous | E403K  | 16 | 84473128  | G | R   |
| 174 | ATP8A2   | non_synonymous | S260I  | 13 | 26116184  | G | K   |
| 090 | ATPGD1   | non_synonymous | I578L  | 11 | 67191320  | A | M   |
| 027 | ATRX     | non_synonymous | A224V  | X  | 76940077  | G | A   |
| 758 | ATRX     | non_synonymous | W222C  | X  | 76940082  | C | G   |
| 189 | ATXN10   | non_synonymous | T303K  | 22 | 46134624  | C | M   |
| 324 | B3GNT9   | non_synonymous | N238K  | 16 | 67183675  | A | W   |
| 091 | BACH2    | non_synonymous | G594R  | 6  | 90660045  | C | Y   |
| 159 | BARD1    | non_synonymous | S162A  | 2  | 215646114 | A | M   |
| 043 | BAZ2B    | non_synonymous | A1743T | 2  | 160205255 | C | Y   |
| 173 | BCAT2    | splicing-site  | -      | 19 | 49299833  | T | M   |
| 053 | BCL11B   | non_synonymous | T845M  | 14 | 99640639  | G | A   |
| 141 | BCOR     | non_synonymous | Y657*  | X  | 39932628  | G | T   |
| 194 | BDKRB1   | non_synonymous | N114I  | 14 | 96730360  | A | W   |
| 027 | BFSP2    | non_synonymous | Y210C  | 3  | 133167389 | A | R   |
| 018 | BIRC2    | non_synonymous | W316R  | 11 | 102221625 | T | Y   |
| 044 | BIRC6    | non_synonymous | L3687R | 2  | 32740548  | T | K   |
| 267 | BLM      | non_synonymous | H805Y  | 15 | 91312674  | C | Y   |
| 322 | BLZF1    | non_synonymous | A296S  | 1  | 169351388 | G | K   |
| 319 | BMP10    | non_synonymous | D403E  | 2  | 69092829  | G | K   |
| 326 | BNC1     | non_synonymous | R611C  | 15 | 83932172  | G | R   |
| 007 | BNC2     | non_synonymous | R52T   | 9  | 16727970  | C | S   |
| 006 | BOD1L    | non_synonymous | G1895E | 4  | 13602840  | C | Y   |
| 148 | BRAF     | non_synonymous | K601N  | 7  | 140453132 | T | W   |
| 279 | BRAF     | non_synonymous | D594G  | 7  | 140453154 | T | Y   |

|     |           |                |          |    |           |   |         |
|-----|-----------|----------------|----------|----|-----------|---|---------|
| 171 | BRUNOL4   | non_synonymous | F251L    | 18 | 34854324  | A | R       |
| 785 | BRUNOL4   | splicing-site  | -        | 18 | 34855076  | T | C       |
| 282 | BTBD16    | non_synonymous | R343W    | 10 | 124090711 | C | Y       |
| 136 | BUD13     | non_synonymous | R477C    | 11 | 116629055 | G | R       |
| 117 | BZRAP1    | non_synonymous | A601S    | 17 | 56395712  | C | M       |
| 040 | C10orf71  | non_synonymous | S1314Y   | 10 | 50534531  | C | M       |
| 270 | C10orf71  | non_synonymous | L236F    | 10 | 50531296  | C | Y       |
| 027 | C10orf79  | non_synonymous | V447M    | 10 | 105953730 | C | Y       |
| 054 | C10orf81  | non_synonymous | V166I    | 10 | 115529621 | G | R       |
| 136 | C11orf57  | non_synonymous | V280G    | 11 | 111953653 | T | K       |
| 030 | C12orf30  | non_synonymous | L607F    | 12 | 112486157 | G | R       |
| 194 | C12orf40  | non_synonymous | T481I    | 12 | 40110588  | C | Y       |
| 189 | C12orf51  | non_synonymous | T2854P   | 12 | 112622944 | T | K       |
| 006 | C12orf64  | non_synonymous | A613E    | 12 | 80764411  | C | M       |
| 322 | C12orf64  | frameshift     | V487fs   | 12 | 80752522  | * | +T      |
| 008 | C15orf42  | non_synonymous | D904Y    | 15 | 90150044  | G | K       |
| 191 | C16orf14  | non_synonymous | P141R    | 16 | 698129    | C | S       |
| 191 | C16orf57  | non_synonymous | P37R     | 16 | 58036394  | C | S       |
| 145 | C17orf66  | non_synonymous | P53S     | 17 | 34192382  | G | R       |
| 156 | C17orf67  | non_synonymous | R60Q     | 17 | 54892279  | C | Y       |
| 189 | C1orf106  | splicing-site  | -        | 1  | 200869350 | T | K       |
| 375 | C1orf114  | non_synonymous | D114E    | 1  | 169391327 | G | K       |
| 322 | C1orf125  | frameshift     | E990del2 | 1  | 179504034 | * | -AAGAAC |
| 100 | C1orf128  | frameshift     | Y150del  | 1  | 24112827  | * | -ATC    |
| 184 | C1orf129  | non_synonymous | R386C    | 1  | 170961432 | C | Y       |
| 038 | C1orf158  | non_synonymous | R187P    | 1  | 12820859  | G | S       |
| 761 | C1QTNF1   | non_synonymous | A105V    | 17 | 77042738  | C | Y       |
| 321 | C2        | non_synonymous | S720N    | 6  | 31913034  | G | R       |
| 148 | C20orf100 | frameshift     | S398ins  | 20 | 42694558  | * | +CCG    |
| 110 | C20orf132 | splicing-site  | -        | 20 | 35802396  | T | W       |
| 063 | C20orf175 | non_synonymous | R52*     | 20 | 49236638  | G | R       |
| 091 | C20orf194 | non_synonymous | G320S    | 20 | 3321174   | C | Y       |
| 170 | C20orf200 | non_synonymous | P75L     | 20 | 61143624  | G | A       |
| 270 | C20orf26  | non_synonymous | L590F    | 20 | 20177382  | C | Y       |
| 290 | C20orf27  | non_synonymous | V34E     | 20 | 3734771   | A | W       |
| 052 | C22orf13  | frameshift     | F109fs   | 22 | 24944012  | * | -ACTC   |
| 007 | C2orf16   | non_synonymous | R994T    | 2  | 27802420  | G | S       |
| 141 | C2orf21   | non_synonymous | A984V    | 2  | 210699644 | C | Y       |
| 172 | C2orf21   | non_synonymous | D278G    | 2  | 210658478 | A | R       |
| 051 | C2orf44   | non_synonymous | G230A    | 2  | 24261676  | C | S       |
| 006 | C3orf32   | splicing-site  | -        | 3  | 8669382   | T | M       |
| 326 | C3orf67   | non_synonymous | V141D    | 3  | 58855954  | A | W       |
| 090 | C4orf43   | non_synonymous | E110D    | 4  | 164436555 | G | S       |
| 159 | C5orf36   | non_synonymous | K547R    | 5  | 93807258  | T | Y       |
| 680 | C6orf205  | non_synonymous | P248T    | 6  | 30954694  | C | C       |
| 033 | C6orf25   | non_synonymous | Q227*    | 6  | 31692785  | C | Y       |
| 043 | C6orf61   | non_synonymous | V342A    | 6  | 119234465 | A | R       |
| 270 | C6orf89   | non_synonymous | Q203*    | 6  | 36882360  | C | Y       |
| 197 | C7        | non_synonymous | C702Y    | 5  | 40976882  | G | R       |
| 110 | C9orf103  | non_synonymous | E199V    | 9  | 86258598  | A | W       |

|     |          |                |        |    |           |   |    |
|-----|----------|----------------|--------|----|-----------|---|----|
| 192 | C9orf107 | non_synonymous | I14T   | 9  | 105348041 | T | Y  |
| 019 | C9orf3   | non_synonymous | R476C  | 9  | 97686329  | C | Y  |
| 039 | C9orf80  | splicing-site  | -      | 9  | 115456515 | A | W  |
| 019 | CACNA1A  | non_synonymous | A405T  | 19 | 13443725  | C | Y  |
| 274 | CACNA1H  | non_synonymous | F244L  | 16 | 1248703   | C | S  |
| 083 | CAGE1    | non_synonymous | L650I  | 6  | 7370187   | G | K  |
| 280 | CALD1    | non_synonymous | A26T   | 7  | 134613509 | G | A  |
| 290 | CAMK2B   | non_synonymous | T623M  | 7  | 44259794  | G | R  |
| 178 | CAMK4    | non_synonymous | Q147K  | 5  | 110730460 | C | M  |
| 275 | CAPN3    | non_synonymous | I766T  | 15 | 42703115  | T | Y  |
| 091 | CARM1    | non_synonymous | V167M  | 19 | 11019824  | G | R  |
| 048 | CASC1    | non_synonymous | L648F  | 12 | 25261709  | G | R  |
| 141 | CASP1    | non_synonymous | A317D  | 11 | 104899907 | G | K  |
| 157 | CBS      | non_synonymous | E104D  | 21 | 44488623  | C | M  |
| 159 | CCBL1    | non_synonymous | P208L  | 9  | 131600088 | G | R  |
| 145 | CCDC129  | splicing-site  | -      | 7  | 31683568  | G | R  |
| 171 | CCDC129  | non_synonymous | F70Y   | 7  | 31594134  | T | W  |
| 192 | CCDC135  | non_synonymous | L299Q  | 16 | 57741409  | T | W  |
| 043 | CCDC144A | non_synonymous | V1408I | 17 | 16676891  | G | R  |
| 017 | CCDC158  | splicing-site  | -      | 4  | 77290577  | T | M  |
| 680 | CCDC59   | non_synonymous | Q180K  | 12 | 82748300  | G | K  |
| 053 | CCDC63   | non_synonymous | I182T  | 12 | 111317765 | T | Y  |
| 325 | CCDC73   | non_synonymous | V505I  | 11 | 32636351  | C | Y  |
| 185 | CCDC82   | non_synonymous | Q386*  | 11 | 96104230  | G | R  |
| 049 | CCNA2    | frameshift     | L376fs | 4  | 122739321 | * | -A |
| 189 | CCNI     | non_synonymous | N349Y  | 4  | 77969461  | T | W  |
| 178 | CCT6B    | non_synonymous | V87I   | 17 | 33285656  | C | Y  |
| 178 | CD163    | non_synonymous | W1117* | 12 | 7633750   | C | Y  |
| 181 | CD36     | non_synonymous | F266L  | 7  | 80299318  | C | M  |
| 273 | CD36     | non_synonymous | G287*  | 7  | 80300333  | G | K  |
| 064 | CD74     | non_synonymous | R10W   | 5  | 149792285 | G | R  |
| 091 | CD99L2   | non_synonymous | A84D   | X  | 149997957 | G | K  |
| 282 | CDC14B   | splicing-site  | -      | 9  | 99301359  | G | Y  |
| 319 | CDC2L2   | non_synonymous | D655E  | 1  | 1571841   | A | M  |
| 141 | CDC2L5   | non_synonymous | T876A  | 7  | 40102450  | A | R  |
| 174 | CDC5L    | non_synonymous | E553*  | 6  | 44394225  | G | K  |
| 110 | CDCP1    | non_synonymous | S523R  | 3  | 45134827  | G | K  |
| 043 | CDH11    | non_synonymous | H464Y  | 16 | 65006807  | G | R  |
| 018 | CDH18    | non_synonymous | A723V  | 5  | 19473540  | G | R  |
| 008 | CDH23    | non_synonymous | N3094S | 10 | 73571125  | A | R  |
| 192 | CDH23    | non_synonymous | R476H  | 10 | 73405724  | G | R  |
| 761 | CDH23    | non_synonymous | S486N  | 10 | 73406232  | G | R  |
| 091 | CDH3     | non_synonymous | D373G  | 16 | 68716326  | A | R  |
| 290 | CDH7     | non_synonymous | N547K  | 18 | 63527033  | C | S  |
| 324 | CDH9     | non_synonymous | F316I  | 5  | 26903799  | A | W  |
| 009 | CEACAM1  | splicing-site  | -      | 19 | 43016500  | T | M  |
| 155 | CENPI    | non_synonymous | K625N  | X  | 100402800 | G | S  |
| 194 | CEP350   | non_synonymous | A2491T | 1  | 180062711 | G | R  |
| 030 | CEP57    | non_synonymous | G341S  | 11 | 95561085  | G | R  |
| 184 | CFH      | non_synonymous | V72I   | 1  | 196642263 | G | R  |

|     |            |                |        |    |           |   |       |
|-----|------------|----------------|--------|----|-----------|---|-------|
| 618 | CFHR4      | non_synonymous | A540P  | 1  | 196887417 | G | S     |
| 156 | CGN        | non_synonymous | P5A    | 1  | 151491008 | C | S     |
| 007 | CHD2       | splicing-site  | -      | 15 | 93552555  | T | K     |
| 043 | CHD2       | non_synonymous | L1270F | 15 | 93540558  | G | K     |
| 175 | CHD2       | frameshift     | L698fs | 15 | 93510647  | * | -C    |
| 181 | CHD2       | non_synonymous | F1146L | 15 | 93534730  | T | K     |
| 185 | CHD2       | non_synonymous | H620L  | 15 | 93499738  | A | W     |
| 063 | CHKB       | non_synonymous | Q360R  | 22 | 51017889  | T | Y     |
| 170 | CHMP2B     | non_synonymous | *214S  | 3  | 87302971  | A | M     |
| 054 | CHSY1      | frameshift     | D589fs | 15 | 101718235 | * | -TCTC |
| 275 | CLASP2     | non_synonymous | Q759H  | 3  | 33623383  | T | K     |
| 156 | CLC        | splicing-site  | -      | 19 | 40228577  | G | Y     |
| 110 | CLDN15     | non_synonymous | A98V   | 7  | 100877648 | G | R     |
| 290 | CLDN2      | non_synonymous | A137V  | X  | 106171868 | C | Y     |
| 272 | CLEC2A     | non_synonymous | R17Q   | 12 | 10084879  | C | Y     |
| 375 | CLMN       | non_synonymous | A934T  | 14 | 95660226  | C | Y     |
| 785 | CLPTM1     | non_synonymous | K172R  | 19 | 45480646  | A | R     |
| 117 | CLSTN3     | non_synonymous | M785I  | 12 | 7303249   | G | K     |
| 064 | CLU        | non_synonymous | Q307H  | 8  | 27462505  | C | M     |
| 194 | CNOT3      | non_synonymous | E70K   | 19 | 54647435  | G | R     |
| 146 | CNTN4      | non_synonymous | A602V  | 3  | 3076337   | C | Y     |
| 328 | CNTN6      | non_synonymous | G664V  | 3  | 1415653   | G | K     |
| 157 | COG4       | non_synonymous | V689F  | 16 | 70515708  | C | M     |
| 022 | COG5       | non_synonymous | L478V  | 7  | 106924152 | G | S     |
| 005 | COL22A1    | non_synonymous | R582C  | 8  | 139790610 | G | R     |
| 324 | COL22A1    | non_synonymous | V1179I | 8  | 139649005 | C | Y     |
| 054 | COL25A1    | non_synonymous | D289N  | 4  | 109817864 | C | Y     |
| 194 | COL25A1    | non_synonymous | D516E  | 4  | 109766375 | A | W     |
| 006 | COL4A3     | non_synonymous | C1551R | 2  | 228173930 | T | Y     |
| 007 | COL4A4     | non_synonymous | R227P  | 2  | 227973562 | C | S     |
| 155 | COL4A6     | non_synonymous | G540E  | X  | 107431229 | C | Y     |
| 178 | COL8A2     | non_synonymous | G281*  | 1  | 36564441  | C | M     |
| 155 | COQ5       | non_synonymous | R92H   | 12 | 120960094 | C | Y     |
| 157 | CORO1C     | non_synonymous | T485R  | 12 | 109042391 | G | S     |
| 159 | CPEB3      | non_synonymous | D502N  | 10 | 93870901  | C | Y     |
| 008 | CPNE4      | non_synonymous | N279I  | 3  | 131300454 | T | W     |
| 279 | CPVL       | non_synonymous | I151F  | 7  | 29134711  | T | W     |
| 618 | CR392039.3 | non_synonymous | A86T   | 21 | 9909079   | C | Y     |
| 270 | CRAT       | non_synonymous | A481P  | 9  | 131860315 | C | S     |
| 282 | CREB1      | non_synonymous | R284*  | 2  | 208442348 | C | Y     |
| 181 | CRELD1     | non_synonymous | G167R  | 3  | 9982572   | G | R     |
| 064 | CRNN       | non_synonymous | R125H  | 1  | 152383072 | C | Y     |
| 042 | CROT       | non_synonymous | F349I  | 7  | 87006749  | T | W     |
| 321 | CRY1       | non_synonymous | R367*  | 12 | 107393367 | G | R     |
| 186 | CSMD1      | non_synonymous | R1013* | 8  | 3165305   | G | R     |
| 278 | CSMD1      | non_synonymous | P1759T | 8  | 3000128   | G | K     |
| 273 | CSMD2      | non_synonymous | V733I  | 1  | 34204792  | C | Y     |
| 043 | CSMD3      | non_synonymous | V3694E | 8  | 113237043 | A | W     |
| 117 | CSMD3      | non_synonymous | P2402H | 8  | 113332171 | G | K     |
| 168 | CSMD3      | non_synonymous | E1838D | 8  | 113420638 | T | K     |

|     |          |                |        |    |           |   |   |
|-----|----------|----------------|--------|----|-----------|---|---|
| 279 | CSMD3    | non_synonymous | A2358T | 8  | 113347651 | C | Y |
| 052 | CSN2     | non_synonymous | E201*  | 4  | 70823066  | C | M |
| 091 | CSTF2    | non_synonymous | P255L  | X  | 100081684 | C | Y |
| 117 | CTBP2    | non_synonymous | A966G  | 10 | 126678148 | G | S |
| 191 | CTH      | non_synonymous | T308R  | 1  | 70899556  | C | S |
| 030 | CTNNA2   | non_synonymous | E87V   | 2  | 79971670  | A | W |
| 006 | CTNNA3   | non_synonymous | K855E  | 10 | 67680213  | T | Y |
| 178 | CTNND2   | non_synonymous | N1166K | 5  | 10973745  | A | M |
| 273 | CTSH     | non_synonymous | S97P   | 15 | 79228033  | A | R |
| 006 | CTSO     | non_synonymous | S249N  | 4  | 156850786 | C | Y |
| 144 | CUBN     | non_synonymous | V2901I | 10 | 16932424  | C | Y |
| 197 | CXorf22  | non_synonymous | S505W  | X  | 35984785  | C | S |
| 090 | CXorf41  | non_synonymous | E9Q    | X  | 106456130 | G | S |
| 171 | CYFIP1   | non_synonymous | P1237T | 15 | 23002981  | C | M |
| 023 | CYFIP2   | non_synonymous | V745I  | 5  | 156757751 | G | R |
| 007 | CYHR1    | non_synonymous | W141S  | 8  | 145689667 | C | S |
| 170 | CYorf15A | non_synonymous | I123V  | Y  | 21751494  | A | R |
| 618 | CYP11B1  | non_synonymous | P434L  | 8  | 143957161 | G | R |
| 019 | CYP2A7   | non_synonymous | R381Q  | 19 | 41383114  | C | Y |
| 188 | CYP3A43  | non_synonymous | M358L  | 7  | 99459281  | A | W |
| 280 | CYP51A1  | non_synonymous | R452H  | 7  | 91743154  | C | Y |
| 192 | CYP8B1   | non_synonymous | Q486*  | 3  | 42915853  | G | R |
| 136 | CYTH4    | splicing-site  | -      | 22 | 37693603  | A | M |
| 194 | DCAF4L2  | non_synonymous | V213M  | 8  | 88885563  | C | Y |
| 186 | DCT      | non_synonymous | L322V  | 13 | 95114343  | A | M |
| 006 | DDAH1    | non_synonymous | G270R  | 1  | 85787185  | C | Y |
| 375 | DDX11L8  | non_synonymous | S409R  | 12 | 9453821   | C | M |
| 188 | DDX3X    | non_synonymous | M330K  | X  | 41203616  | T | W |
| 328 | DDX3X    | non_synonymous | S410F  | X  | 41204715  | C | Y |
| 375 | DDX52    | non_synonymous | K73N   | 17 | 36002206  | T | W |
| 280 | DDX54    | splicing-site  | -      | 12 | 113607573 | T | R |
| 091 | DDX58    | non_synonymous | E758K  | 9  | 32466353  | C | Y |
| 323 | DDX6     | non_synonymous | T266M  | 11 | 118630698 | G | R |
| 146 | DENND1A  | non_synonymous | L596F  | 9  | 126145984 | G | R |
| 174 | DEPDC1B  | non_synonymous | R158G  | 5  | 59941425  | G | S |
| 197 | DHRS7B   | non_synonymous | K183*  | 17 | 21087704  | A | W |
| 030 | DHX36    | non_synonymous | Y197C  | 3  | 154032848 | T | Y |
| 054 | DIAPH3   | non_synonymous | L845P  | 13 | 60453436  | A | R |
| 171 | DIO2     | non_synonymous | S85G   | 14 | 80669601  | T | Y |
| 041 | DLC1     | non_synonymous | S744T  | 8  | 12957615  | C | S |
| 267 | DLC1     | non_synonymous | N251S  | 8  | 13356829  | T | Y |
| 375 | DLEC1    | non_synonymous | V944I  | 3  | 38141882  | G | R |
| 178 | DLG2     | non_synonymous | R10C   | 11 | 83362897  | G | R |
| 188 | DLG5     | non_synonymous | V706M  | 10 | 79589182  | C | Y |
| 270 | DLK1     | non_synonymous | A249V  | 14 | 101200827 | C | Y |
| 324 | DMD      | non_synonymous | L341M  | X  | 32663209  | G | T |
| 090 | DMXL2    | non_synonymous | P1924S | 15 | 51773533  | G | R |
| 758 | DNAH17   | non_synonymous | C3228Y | 17 | 76455219  | C | Y |
| 044 | DNAH3    | non_synonymous | A2694V | 16 | 20986733  | G | R |
| 083 | DNAH5    | non_synonymous | R529W  | 5  | 13911554  | G | R |

|     |          |                |        |    |           |   |   |
|-----|----------|----------------|--------|----|-----------|---|---|
| 197 | DNAH6    | non_synonymous | P966T  | 2  | 84831490  | C | M |
| 193 | DNAH7    | splicing-site  | -      | 2  | 196661298 | T | R |
| 009 | DNAH8    | non_synonymous | G1547E | 6  | 38813489  | G | R |
| 321 | DNAH9    | splicing-site  | -      | 17 | 11572379  | A | M |
| 264 | DNAJC28  | non_synonymous | T197M  | 21 | 34861111  | G | R |
| 174 | DNM1     | non_synonymous | V659L  | 9  | 131010931 | G | S |
| 006 | DOCK1    | non_synonymous | E1608K | 10 | 129216800 | G | R |
| 051 | DOCK4    | non_synonymous | T622A  | 7  | 111512387 | T | Y |
| 282 | DOCK4    | non_synonymous | T1126R | 7  | 111428742 | G | S |
| 279 | DPCR1    | non_synonymous | H924L  | 6  | 30919012  | A | W |
| 282 | DPEP1    | splicing-site  | -      | 16 | 89703790  | T | T |
| 110 | DPF2     | non_synonymous | P222L  | 11 | 65113164  | C | Y |
| 266 | DPP6     | non_synonymous | G269W  | 7  | 154519519 | G | K |
| 323 | DPP6     | non_synonymous | A317T  | 7  | 154561192 | G | R |
| 192 | DRP2     | non_synonymous | A520V  | X  | 100505430 | C | Y |
| 018 | DSC3     | non_synonymous | Q157R  | 18 | 28609479  | T | Y |
| 785 | DSCAML1  | non_synonymous | V179I  | 11 | 117651217 | C | Y |
| 038 | DSE      | non_synonymous | G543E  | 6  | 116757259 | G | R |
| 171 | DSG2     | non_synonymous | K275Q  | 18 | 29104543  | A | M |
| 758 | DSG3     | non_synonymous | A527T  | 18 | 29046660  | G | R |
| 018 | DST      | non_synonymous | V5572F | 6  | 56394500  | C | M |
| 171 | DST      | non_synonymous | E2090* | 6  | 56484190  | C | M |
| 013 | DTNA     | non_synonymous | E753Q  | 18 | 32462127  | G | S |
| 170 | DTNA     | non_synonymous | R703*  | 18 | 32459628  | C | Y |
| 052 | DTX1     | non_synonymous | W30*   | 12 | 113496087 | G | R |
| 642 | DTX2     | non_synonymous | F244S  | 7  | 76112287  | T | Y |
| 016 | DUOXA1   | non_synonymous | V431A  | 15 | 45409873  | A | R |
| 045 | DYNC1H1  | non_synonymous | L3761F | 14 | 102505414 | G | S |
| 186 | DYNC2H1  | non_synonymous | Q3615R | 11 | 103153747 | A | R |
| 044 | ECE2     | non_synonymous | S672N  | 3  | 184008350 | G | R |
| 322 | ECHDC3   | non_synonymous | V193I  | 10 | 11797434  | G | R |
| 325 | EDAR     | non_synonymous | C333Y  | 2  | 109524377 | C | Y |
| 022 | EEF1A1   | non_synonymous | G70A   | 6  | 74229175  | C | S |
| 194 | EFHA2    | non_synonymous | R316H  | 8  | 16956025  | G | R |
| 082 | EGFR     | non_synonymous | D1168N | 7  | 55273179  | G | R |
| 618 | EGFR     | non_synonymous | V323I  | 7  | 55223600  | G | A |
| 181 | EGR1     | non_synonymous | E37K   | 5  | 137801559 | G | R |
| 082 | EGR2     | non_synonymous | H384N  | 10 | 64573248  | G | K |
| 290 | EGR2     | non_synonymous | E356K  | 10 | 64573332  | C | Y |
| 280 | EHD4     | splicing-site  | -      | 15 | 42211822  | A | K |
| 324 | EIF4A3   | non_synonymous | I141L  | 17 | 78113891  | T | K |
| 052 | ELAVL2   | non_synonymous | L243R  | 9  | 23701446  | A | M |
| 280 | EMR4P    | non_synonymous | A209T  | 19 | 6971308   | C | Y |
| 124 | ENPP6    | non_synonymous | R82H   | 4  | 185074883 | C | Y |
| 032 | ENTPD4   | non_synonymous | Y429C  | 8  | 23294535  | T | Y |
| 090 | EP300    | non_synonymous | C1790G | 22 | 41573083  | T | K |
| 188 | EPB41L4A | non_synonymous | R246Q  | 5  | 111594984 | C | Y |
| 194 | EPHA6    | non_synonymous | E735K  | 3  | 97251204  | G | R |
| 064 | EPHA7    | non_synonymous | S684I  | 6  | 93967876  | C | M |
| 178 | EPHB1    | non_synonymous | R364Q  | 3  | 134851685 | G | R |

|     |          |                |        |    |           |   |   |
|-----|----------|----------------|--------|----|-----------|---|---|
| 270 | EPHB1    | non_synonymous | V760A  | 3  | 134920464 | T | Y |
| 030 | ERBB4    | non_synonymous | T475P  | 2  | 212566758 | T | K |
| 280 | ERF      | non_synonymous | W67G   | 19 | 42754541  | A | M |
| 166 | ERICH1   | non_synonymous | E193K  | 8  | 623775    | C | Y |
| 328 | ETAA1    | non_synonymous | P17R   | 2  | 67624630  | C | S |
| 282 | EXOC3L   | splicing-site  | -      | 16 | 67221742  | A | Y |
| 192 | EXOC4    | non_synonymous | T485K  | 7  | 133314834 | C | M |
| 041 | EXOC6B   | non_synonymous | G713C  | 2  | 72562135  | C | M |
| 785 | EXT2     | non_synonymous | R427Q  | 11 | 44193237  | G | R |
| 039 | EYA1     | non_synonymous | Q119L  | 8  | 72234031  | T | W |
| 758 | FAM114A2 | non_synonymous | R340I  | 5  | 153382525 | C | M |
| 185 | FAM117A  | non_synonymous | E133*  | 17 | 47799926  | C | M |
| 324 | FAM117A  | non_synonymous | S274F  | 17 | 47794964  | G | R |
| 039 | FAM120B  | non_synonymous | T558P  | 6  | 170628150 | A | M |
| 039 | FAM120B  | non_synonymous | V560G  | 6  | 170628157 | T | K |
| 193 | FAM122C  | non_synonymous | T133A  | X  | 133986881 | A | R |
| 321 | FAM13A   | non_synonymous | R649Q  | 4  | 89671055  | C | Y |
| 290 | FAM190A  | non_synonymous | E664Q  | 4  | 91645122  | G | S |
| 264 | FAM22G   | non_synonymous | P308L  | 9  | 99698787  | C | T |
| 323 | FAM47B   | non_synonymous | G585C  | X  | 34962701  | G | K |
| 175 | FAM5C    | non_synonymous | I486V  | 1  | 190067993 | T | Y |
| 168 | FANCD2   | splicing-site  | -      | 3  | 10106560  | G | K |
| 033 | FANCE    | splicing-site  | -      | 6  | 35428397  | T | K |
| 272 | FANCM    | non_synonymous | C1819W | 14 | 45665491  | T | K |
| 272 | FANCM    | non_synonymous | S1869T | 14 | 45665639  | T | W |
| 148 | FAT1     | non_synonymous | T3145M | 4  | 187534301 | G | R |
| 618 | FAT3     | non_synonymous | C8S    | 11 | 92085300  | T | W |
| 761 | FAT3     | non_synonymous | F193L  | 11 | 92085857  | C | S |
| 194 | FBF1     | non_synonymous | H470Q  | 17 | 73918150  | G | K |
| 267 | FBLN2    | non_synonymous | A891T  | 3  | 13670506  | G | R |
| 030 | FBN1     | non_synonymous | N2740S | 15 | 48704773  | T | Y |
| 043 | FBN1     | non_synonymous | A2086S | 15 | 48730022  | C | M |
| 181 | FBN2     | non_synonymous | C132Y  | 5  | 127866329 | C | Y |
| 618 | FBN2     | non_synonymous | R1237L | 5  | 127671694 | C | M |
| 680 | FBN3     | non_synonymous | T1105M | 19 | 8183804   | G | R |
| 027 | FBXL13   | splicing-site  | -      | 7  | 102608566 | A | W |
| 016 | FBXL16   | non_synonymous | N269S  | 16 | 745751    | T | Y |
| 321 | FBXL7    | non_synonymous | R306Q  | 5  | 15936877  | G | R |
| 618 | FBXO17   | splicing-site  | -      | 19 | 39412308  | G | S |
| 045 | FBXO28   | non_synonymous | R363C  | 1  | 224345428 | C | Y |
| 054 | FBXW10   | non_synonymous | C608F  | 17 | 18671878  | G | K |
| 194 | FCRL1    | non_synonymous | Y168S  | 1  | 157772271 | T | K |
| 194 | FCRL1    | non_synonymous | T165A  | 1  | 157772281 | T | Y |
| 124 | FGD3     | non_synonymous | A190V  | 9  | 95766308  | C | Y |
| 178 | FGF10    | non_synonymous | V33I   | 5  | 44388688  | C | Y |
| 064 | FGFR2    | non_synonymous | Y350N  | 10 | 123276935 | A | W |
| 278 | FGFR2    | non_synonymous | D491N  | 10 | 123263332 | C | Y |
| 375 | FGG      | non_synonymous | C24S   | 4  | 155533692 | A | W |
| 141 | FGL1     | non_synonymous | R88C   | 8  | 17739640  | G | R |
| 019 | FHAD1    | non_synonymous | S1321C | 1  | 15708528  | A | W |

|     |         |                |         |    |           |   |      |
|-----|---------|----------------|---------|----|-----------|---|------|
| 039 | FHDC1   | splicing-site  | -       | 4  | 153881715 | A | W    |
| 090 | FHL1    | non_synonymous | S260P   | X  | 135292071 | T | Y    |
| 048 | FHOD3   | non_synonymous | K943M   | 18 | 34298614  | A | W    |
| 090 | FILIP1L | non_synonymous | K779Q   | 3  | 99568185  | T | K    |
| 168 | FKBP8   | splicing-site  | -       | 19 | 18652487  | T | M    |
| 043 | FLNB    | splicing-site  | -       | 3  | 58109419  | T | K    |
| 185 | FLOT1   | non_synonymous | I249T   | 6  | 30698855  | A | R    |
| 083 | FLRT2   | non_synonymous | T380S   | 14 | 86088996  | A | W    |
| 032 | FNDC1   | non_synonymous | W1678*  | 6  | 159672533 | G | R    |
| 272 | FNIP2   | non_synonymous | E1016V  | 4  | 159812626 | A | W    |
| 758 | FOXD4L2 | frameshift     | C405fs  | 9  | 42719279  | * | -C   |
| 152 | FOXD4L4 | frameshift     | *417del | 9  | 70427649  | * | -CAG |
| 290 | FOXP3   | non_synonymous | Q407L   | X  | 49107946  | T | W    |
| 144 | FRMD3   | non_synonymous | S509L   | 9  | 85863101  | G | R    |
| 049 | FRMPD4  | non_synonymous | K38N    | X  | 12627915  | G | S    |
| 144 | FRYL    | non_synonymous | V2450G  | 4  | 48525090  | A | M    |
| 029 | FSD1L   | non_synonymous | I26V    | 9  | 108223861 | A | R    |
| 182 | FSHB    | non_synonymous | G83S    | 11 | 30255204  | G | R    |
| 264 | FSTL5   | non_synonymous | V581L   | 4  | 162376256 | C | M    |
| 280 | FSTL5   | non_synonymous | S401R   | 4  | 162459427 | G | K    |
| 016 | FUBP1   | non_synonymous | Q541*   | 1  | 78425887  | G | R    |
| 270 | FUBP1   | non_synonymous | G140*   | 1  | 78432628  | C | M    |
| 145 | FUT1    | non_synonymous | V206F   | 19 | 49254292  | C | M    |
| 282 | GABRA5  | non_synonymous | C173Y   | 15 | 27159970  | G | R    |
| 064 | GAD1    | non_synonymous | R90C    | 2  | 171686107 | C | Y    |
| 194 | GALK2   | non_synonymous | R39*    | 15 | 49493420  | C | Y    |
| 159 | GALNT11 | non_synonymous | R549W   | 7  | 151818003 | C | Y    |
| 027 | GALNT2  | non_synonymous | L421P   | 1  | 230398700 | T | Y    |
| 159 | GALNT8  | non_synonymous | H121Y   | 12 | 4835847   | C | Y    |
| 274 | GARNL1  | non_synonymous | M2060V  | 14 | 36008822  | T | Y    |
| 007 | GAS2L3  | non_synonymous | P442R   | 12 | 101017908 | C | S    |
| 013 | GBP2    | splicing-site  | -       | 1  | 89582674  | G | Y    |
| 083 | GCN1L1  | non_synonymous | R2649*  | 12 | 120565724 | G | R    |
| 030 | GCSH    | non_synonymous | R51H    | 16 | 81124282  | C | Y    |
| 270 | GDF9    | non_synonymous | M446T   | 5  | 132197309 | A | R    |
| 157 | GFRA2   | non_synonymous | Q227K   | 8  | 21608215  | G | K    |
| 006 | GJB5    | non_synonymous | R32H    | 1  | 35223026  | G | R    |
| 272 | GJD2    | non_synonymous | R108C   | 15 | 35045323  | G | R    |
| 145 | GLI1    | non_synonymous | G819A   | 12 | 57864979  | G | S    |
| 758 | GLI2    | non_synonymous | Y259*   | 2  | 121726423 | C | M    |
| 006 | GNAI1   | non_synonymous | A101V   | 7  | 79818546  | C | Y    |
| 136 | GNAT1   | non_synonymous | A83T    | 3  | 50230795  | G | R    |
| 282 | GNAT1   | splicing-site  | -       | 3  | 50231184  | A | C    |
| 278 | GPC6    | non_synonymous | P366S   | 13 | 94958321  | C | Y    |
| 194 | GPR1    | non_synonymous | H204Q   | 2  | 207041360 | A | W    |
| 680 | GPR112  | non_synonymous | L418P   | X  | 135427118 | T | Y    |
| 032 | GPR98   | non_synonymous | T2017P  | 5  | 89979787  | A | M    |
| 642 | GPRC5B  | non_synonymous | T33S    | 16 | 19884071  | T | W    |
| 192 | GPS2    | non_synonymous | Q192*   | 17 | 7216947   | G | A    |
| 136 | GRIK3   | non_synonymous | D733N   | 1  | 37271822  | C | Y    |



|     |           |                |         |    |           |   |      |
|-----|-----------|----------------|---------|----|-----------|---|------|
| 266 | GRIK5     | non_synonymous | Y130S   | 19 | 42566759  | T | K    |
| 270 | GRLF1     | non_synonymous | N1099S  | 19 | 47425228  | A | R    |
| 013 | GRM1      | non_synonymous | A184T   | 6  | 146351203 | G | R    |
| 185 | GRM3      | non_synonymous | R723W   | 7  | 86468997  | C | Y    |
| 144 | GRM5      | non_synonymous | E250D   | 11 | 88718018  | T | K    |
| 282 | GRM7      | non_synonymous | R260H   | 3  | 7340413   | G | R    |
| 027 | GRM8      | non_synonymous | L626P   | 7  | 126173559 | A | R    |
| 027 | GRM8      | non_synonymous | N480S   | 7  | 126249471 | T | Y    |
| 165 | GRWD1     | frameshift     | D123del | 19 | 48950001  | * | -GAA |
| 280 | GTF2IRD1  | splicing-site  | -       | 7  | 73959134  | T | K    |
| 680 | GUCY1A2   | non_synonymous | E729V   | 11 | 106558381 | T | W    |
| 172 | GUCY2D    | non_synonymous | R331P   | 17 | 7907440   | G | C    |
| 016 | H2AFY2    | non_synonymous | T36M    | 10 | 71835521  | C | Y    |
| 273 | HAO1      | non_synonymous | V367F   | 20 | 7864254   | C | M    |
| 184 | HCN1      | non_synonymous | T820M   | 5  | 45262237  | G | R    |
| 043 | HDAC9     | frameshift     | V1037fs | 7  | 19015515  | * | +T   |
| 267 | HEATR7B1  | non_synonymous | I932T   | 2  | 234722366 | T | Y    |
| 274 | HECW1     | non_synonymous | R1256*  | 7  | 43546774  | C | Y    |
| 051 | HERC3     | non_synonymous | G189E   | 4  | 89574122  | G | R    |
| 290 | HGF       | non_synonymous | R468H   | 7  | 81346550  | C | Y    |
| 054 | HHIP      | non_synonymous | D513N   | 4  | 145635490 | G | R    |
| 006 | HHLA2     | non_synonymous | I14V    | 3  | 108070700 | A | R    |
| 117 | HIST1H1B  | non_synonymous | A137G   | 6  | 27834898  | G | S    |
| 051 | HIST1H1D  | non_synonymous | S90N    | 6  | 26234893  | C | Y    |
| 091 | HIST1H1E  | non_synonymous | A65P    | 6  | 26156811  | G | C    |
| 110 | HIST1H2BO | non_synonymous | I40M    | 6  | 27861360  | C | S    |
| 280 | HIST2H2AC | non_synonymous | G5D     | 1  | 149858538 | G | R    |
| 191 | HIST2H2BE | non_synonymous | S37R    | 1  | 149858080 | G | S    |
| 178 | HIST4H4   | non_synonymous | G95S    | 12 | 14923736  | C | Y    |
| 020 | HIVEP1    | non_synonymous | S1572C  | 6  | 12124743  | C | S    |
| 319 | HIVEP2    | non_synonymous | V1043I  | 6  | 143092749 | C | Y    |
| 007 | HLA-DRB5  | non_synonymous | N149S   | 6  | 32487353  | T | Y    |
| 124 | HMCN1     | non_synonymous | R4475H  | 1  | 186105911 | G | R    |
| 195 | HMCN1     | non_synonymous | T3811A  | 1  | 186084416 | A | R    |
| 157 | HMCN2     | non_synonymous | R394*   | 9  | 133303780 | C | Y    |
| 039 | HMGCLL1   | non_synonymous | L335F   | 6  | 55304240  | G | R    |
| 170 | HNMT      | non_synonymous | T27M    | 2  | 138722141 | C | Y    |
| 186 | HOXD13    | non_synonymous | K303N   | 2  | 176959335 | G | K    |
| 174 | HPS4      | non_synonymous | G231E   | 22 | 26862070  | C | Y    |
| 083 | HPSE2     | non_synonymous | Y544*   | 10 | 100221558 | G | K    |
| 029 | HRNR      | non_synonymous | R547*   | 1  | 152192466 | G | R    |
| 194 | HSF5      | non_synonymous | G436V   | 17 | 56540378  | C | M    |
| 041 | HSPG2     | non_synonymous | L2965P  | 1  | 22169279  | A | R    |
| 323 | HSPH1     | non_synonymous | I809V   | 13 | 31711613  | T | Y    |
| 009 | HTR3B     | non_synonymous | M288T   | 11 | 113813870 | T | Y    |
| 168 | HYAL4     | non_synonymous | Q114K   | 7  | 123508667 | C | M    |
| 018 | HYDIN     | non_synonymous | H4269Y  | 16 | 70883694  | G | R    |
| 091 | HYDIN     | frameshift     | Q3904fs | 16 | 70896015  | * | -A   |
| 181 | HYDIN     | non_synonymous | I3028F  | 16 | 70929947  | T | W    |
| 761 | HYDIN     | non_synonymous | N2468S  | 16 | 70954873  | T | Y    |

|     |          |                |         |    |           |   |     |
|-----|----------|----------------|---------|----|-----------|---|-----|
| 043 | IGF1R    | non_synonymous | A1206T  | 15 | 99491831  | G | R   |
| 785 | IGLV3-1  | non_synonymous | Y98S    | 22 | 23235963  | A | M   |
| 008 | IGSF10   | non_synonymous | M1190K  | 3  | 151164200 | A | W   |
| 178 | IGSF9B   | non_synonymous | P982L   | 11 | 133790675 | G | A   |
| 013 | IKZF3    | non_synonymous | L162R   | 17 | 37947776  | A | M   |
| 272 | IL17RC   | splicing-site  | -       | 3  | 9970172   | T | Y   |
| 186 | IL33     | non_synonymous | Q34K    | 9  | 6250482   | C | M   |
| 276 | IL8      | non_synonymous | D79E    | 4  | 74607702  | C | M   |
| 325 | ILVBL    | splicing-site  | -       | 19 | 15226484  | A | K   |
| 189 | IMPG2    | non_synonymous | S1144R  | 3  | 100948427 | T | K   |
| 175 | INVS     | non_synonymous | K310I   | 9  | 103008920 | A | W   |
| 194 | IQCE     | non_synonymous | S95*    | 7  | 2611850   | C | S   |
| 188 | IQGAP2   | non_synonymous | R982H   | 5  | 75967685  | G | R   |
| 181 | IRAK1    | non_synonymous | L692F   | X  | 153277986 | G | A   |
| 157 | IRF4     | non_synonymous | S114R   | 6  | 394946    | C | M   |
| 278 | ISX      | non_synonymous | Q74L    | 22 | 35463301  | A | W   |
| 016 | ITGA2B   | non_synonymous | A164V   | 17 | 42463002  | G | R   |
| 052 | ITGA2B   | splicing-site  | -       | 17 | 42461451  | T | C   |
| 027 | ITK      | non_synonymous | K119E   | 5  | 156641231 | A | R   |
| 282 | ITPRIPL1 | non_synonymous | T85P    | 2  | 96992598  | A | M   |
| 019 | JMJD4    | non_synonymous | Q451*   | 1  | 227920134 | G | R   |
| 758 | JSRP1    | non_synonymous | E9K     | 19 | 2255289   | C | T   |
| 136 | KALRN    | non_synonymous | V743D   | 3  | 124117606 | T | W   |
| 273 | KANK3    | splicing-site  | -       | 19 | 8399382   | T | M   |
| 290 | KATNAL1  | non_synonymous | R290C   | 13 | 30805468  | G | R   |
| 146 | KCNA10   | non_synonymous | V417I   | 1  | 111060161 | C | Y   |
| 038 | KCNA4    | non_synonymous | L589F   | 11 | 30032461  | G | R   |
| 032 | KCNAB1   | non_synonymous | G132A   | 3  | 156175279 | G | S   |
| 273 | KCNAB1   | non_synonymous | A41V    | 3  | 155861089 | C | Y   |
| 039 | KCNC4    | non_synonymous | G333S   | 1  | 110765904 | G | R   |
| 064 | KCNH7    | non_synonymous | L413R   | 2  | 163302844 | A | M   |
| 007 | KCNH8    | non_synonymous | K90I    | 3  | 19295338  | A | W   |
| 064 | KCNT2    | non_synonymous | Y279N   | 1  | 196397384 | A | W   |
| 184 | KCTD5    | non_synonymous | L202P   | 16 | 2752409   | T | Y   |
| 278 | KDM2B    | non_synonymous | H799R   | 12 | 121881870 | T | Y   |
| 761 | KDM5A    | non_synonymous | D920Y   | 12 | 427411    | C | M   |
| 007 | KIAA0146 | non_synonymous | P24S    | 8  | 48192486  | C | Y   |
| 185 | KIAA0284 | non_synonymous | V1542M  | 14 | 105361146 | G | R   |
| 029 | KIAA0586 | frameshift     | Q1512fs | 14 | 58979291  | * | -AA |
| 016 | KIAA0892 | splicing-site  | -       | 19 | 19431945  | G | R   |
| 189 | KIAA0913 | non_synonymous | V1308I  | 10 | 75557813  | G | R   |
| 029 | KIAA0947 | non_synonymous | G548*   | 5  | 5461089   | G | K   |
| 181 | KIAA1033 | non_synonymous | M495V   | 12 | 105534102 | A | R   |
| 044 | KIAA1217 | non_synonymous | R1188W  | 10 | 24831649  | C | Y   |
| 029 | KIAA1377 | non_synonymous | S547Y   | 11 | 101833406 | C | M   |
| 191 | KIAA1486 | non_synonymous | C292S   | 2  | 226447007 | T | W   |
| 165 | KIAA1543 | non_synonymous | D1251N  | 19 | 7682863   | G | R   |
| 032 | KIAA1632 | non_synonymous | L776P   | 18 | 43510727  | A | R   |
| 155 | KIAA1632 | frameshift     | L1146fs | 18 | 43496118  | * | -A  |
| 052 | KIAA1881 | non_synonymous | A397G   | 19 | 4512740   | G | S   |

|     |           |                |        |    |           |   |   |
|-----|-----------|----------------|--------|----|-----------|---|---|
| 090 | KIAA2018  | splicing-site  | -      | 3  | 113383158 | T | R |
| 141 | KIF13B    | splicing-site  | -      | 8  | 29120495  | T | M |
| 181 | KIF18B    | splicing-site  | -      | 17 | 43003780  | T | M |
| 083 | KIF1A     | non_synonymous | S1699P | 2  | 241658566 | A | R |
| 267 | KIF26B    | non_synonymous | A188T  | 1  | 245530232 | G | R |
| 009 | KIF5A     | non_synonymous | R718W  | 12 | 57970115  | C | Y |
| 270 | KIF5C     | non_synonymous | V484L  | 2  | 149837956 | G | S |
| 033 | KIT       | non_synonymous | V833L  | 4  | 55602676  | G | S |
| 016 | KLHL17    | non_synonymous | L298Q  | 1  | 897609    | T | W |
| 030 | KRIT1     | non_synonymous | V710E  | 7  | 91830634  | A | W |
| 159 | KRT1      | non_synonymous | I312T  | 12 | 53071462  | A | R |
| 039 | KRT2      | non_synonymous | R341H  | 12 | 53042057  | C | Y |
| 051 | KRT6B     | non_synonymous | R182W  | 12 | 52844401  | G | R |
| 148 | KRTAP10-6 | non_synonymous | V230M  | 21 | 46011678  | C | Y |
| 165 | LAMA3     | non_synonymous | D918V  | 18 | 21407355  | A | W |
| 051 | LAMB1     | non_synonymous | A843T  | 7  | 107600067 | C | Y |
| 064 | LAMB4     | non_synonymous | N589K  | 7  | 107720166 | G | K |
| 618 | LARP1B    | non_synonymous | V631I  | 4  | 129099792 | G | R |
| 018 | LAT2      | non_synonymous | R123W  | 7  | 73636001  | C | Y |
| 032 | LBA1      | non_synonymous | E1791G | 3  | 36879876  | T | Y |
| 680 | LCAP      | non_synonymous | D144E  | X  | 153153991 | C | S |
| 267 | LCMT2     | non_synonymous | Y193C  | 15 | 43622110  | T | C |
| 266 | LCN10     | splicing-site  | -      | 9  | 139635815 | A | W |
| 192 | LEFTY2    | non_synonymous | T296P  | 1  | 226125356 | T | K |
| 117 | LEMD3     | non_synonymous | L703F  | 12 | 65634001  | A | M |
| 110 | LEO1      | non_synonymous | D665E  | 15 | 52230359  | A | W |
| 019 | LIPG      | non_synonymous | V269M  | 18 | 47107796  | G | R |
| 156 | LMTK2     | non_synonymous | T840I  | 7  | 97822296  | C | Y |
| 761 | LNPEP     | non_synonymous | D372G  | 5  | 96322358  | A | R |
| 063 | LPHN2     | non_synonymous | A1066T | 1  | 82447514  | G | R |
| 192 | LPHN2     | non_synonymous | T848S  | 1  | 82434892  | A | W |
| 053 | LPHN3     | non_synonymous | W273R  | 4  | 62598894  | T | W |
| 082 | LPHN3     | non_synonymous | P70H   | 4  | 62453098  | C | M |
| 091 | LPHN3     | non_synonymous | A652V  | 4  | 62800643  | C | Y |
| 184 | LRIG3     | non_synonymous | V811M  | 12 | 59271287  | C | Y |
| 178 | LRIT1     | non_synonymous | V538I  | 10 | 85991943  | C | Y |
| 023 | LRP1      | non_synonymous | R1281C | 12 | 57569739  | C | Y |
| 022 | LRP12     | non_synonymous | R429H  | 8  | 105509494 | C | Y |
| 005 | LRP1B     | non_synonymous | C2205F | 2  | 141458115 | C | M |
| 274 | LRP1B     | non_synonymous | S3352P | 2  | 141214044 | A | R |
| 276 | LRP1B     | non_synonymous | Y4436F | 2  | 141027862 | T | W |
| 322 | LRP1B     | non_synonymous | C2567S | 2  | 141294203 | C | S |
| 326 | LRP1B     | non_synonymous | V3150I | 2  | 141243000 | C | Y |
| 145 | LRP2      | non_synonymous | R3646H | 2  | 170030506 | C | Y |
| 184 | LRP5      | non_synonymous | A65V   | 11 | 68115417  | C | Y |
| 054 | LRP6      | non_synonymous | R360C  | 12 | 12334272  | G | R |
| 054 | LRRC2     | non_synonymous | V229I  | 3  | 46571483  | C | Y |
| 184 | LRRC4     | splicing-site  | -      | 7  | 127670795 | A | K |
| 680 | LRRC41    | non_synonymous | Q638E  | 1  | 46745906  | G | S |
| 170 | LRRC52    | non_synonymous | L103H  | 1  | 165513841 | T | W |

|     |           |                |        |    |           |   |   |
|-----|-----------|----------------|--------|----|-----------|---|---|
| 146 | LRRRC6    | non_synonymous | R11W   | 8  | 133673853 | G | R |
| 053 | LRRFIP2   | non_synonymous | R450Q  | 3  | 37116537  | C | Y |
| 185 | LTB       | splicing-site  | -      | 6  | 31549590  | G | M |
| 032 | LTBP1     | non_synonymous | P669S  | 2  | 33477749  | C | Y |
| 045 | LTBP4     | splicing-site  | -      | 19 | 41119946  | T | G |
| 170 | LUZP2     | non_synonymous | M206I  | 11 | 25004692  | G | K |
| 290 | LUZP2     | non_synonymous | R241G  | 11 | 25004795  | A | R |
| 136 | LYST      | non_synonymous | S1840L | 1  | 235938328 | G | R |
| 194 | MAGEB1    | non_synonymous | L236F  | X  | 30269318  | A | M |
| 174 | MAGEB6    | non_synonymous | P103L  | X  | 26212271  | C | Y |
| 171 | MAGEC1    | non_synonymous | Q32K   | X  | 140993284 | C | M |
| 083 | MAGEH1    | non_synonymous | W197*  | X  | 55479398  | G | R |
| 188 | MAGOH     | non_synonymous | D43E   | 1  | 53701267  | A | W |
| 785 | MAL       | splicing-site  | -      | 2  | 95713702  | A | C |
| 168 | MAN2B1    | splicing-site  | -      | 19 | 12768875  | T | M |
| 761 | MAP2K2    | non_synonymous | Q60P   | 19 | 4117541   | T | K |
| 375 | MAP3K15   | non_synonymous | F1058L | X  | 19389585  | A | G |
| 185 | MAP4K4    | non_synonymous | N577K  | 2  | 102477313 | C | M |
| 193 | MAP7      | non_synonymous | E431K  | 6  | 136686921 | C | Y |
| 194 | MARS      | non_synonymous | C12W   | 12 | 57881909  | C | S |
| 159 | MATK      | non_synonymous | A203V  | 19 | 3783195   | G | R |
| 155 | MBNL2     | splicing-site  | -      | 13 | 98009104  | G | R |
| 174 | MBTPS1    | non_synonymous | G790R  | 16 | 84099358  | C | Y |
| 186 | MDGA2     | non_synonymous | R53W   | 14 | 47770670  | G | R |
| 159 | MDN1      | non_synonymous | L2900V | 6  | 90409954  | G | S |
| 278 | MED12     | non_synonymous | L36R   | X  | 70339230  | T | G |
| 282 | MED12     | non_synonymous | G44S   | X  | 70339253  | G | R |
| 008 | MEGF9     | non_synonymous | I399V  | 9  | 123374677 | T | Y |
| 171 | MFN1      | non_synonymous | N602I  | 3  | 179103415 | A | W |
| 019 | MGAT4B    | non_synonymous | H427N  | 5  | 179226037 | G | K |
| 328 | MGAT5     | non_synonymous | Q563R  | 2  | 135180384 | A | R |
| 322 | MGMT      | splicing-site  | -      | 10 | 131565050 | A | M |
| 168 | MIA       | non_synonymous | Q131R  | 19 | 41283321  | A | R |
| 019 | MICALCL   | non_synonymous | C114Y  | 11 | 12315319  | G | R |
| 030 | MID1      | non_synonymous | R36C   | X  | 10535482  | G | A |
| 146 | MINK1     | splicing-site  | -      | 17 | 4794810   | G | R |
| 172 | MIOS      | non_synonymous | P767R  | 7  | 7635991   | C | S |
| 039 | MKL1      | non_synonymous | E816G  | 22 | 40807746  | T | C |
| 032 | MLLT3     | non_synonymous | A313T  | 9  | 20413907  | C | Y |
| 141 | MMEL1     | non_synonymous | R246W  | 1  | 2537701   | G | R |
| 049 | MNDA      | non_synonymous | L367V  | 1  | 158817629 | C | S |
| 048 | MOAP1     | non_synonymous | M15T   | 14 | 93650544  | A | R |
| 045 | MPDZ      | non_synonymous | V1950A | 9  | 13110044  | A | R |
| 189 | MPHOSPH10 | non_synonymous | I31S   | 2  | 71360030  | T | K |
| 038 | MRGPRE    | non_synonymous | E32K   | 11 | 3249936   | C | Y |
| 054 | MRPL3     | non_synonymous | D54E   | 3  | 131220699 | G | K |
| 642 | MRPS6     | non_synonymous | E106G  | 21 | 35514839  | A | R |
| 019 | MSI2      | splicing-site  | -      | 17 | 55334826  | G | S |
| 157 | MUC16     | non_synonymous | R2782T | 19 | 9083470   | C | S |
| 159 | MUC16     | non_synonymous | L4137V | 19 | 9075037   | G | S |

|     |            |                |        |    |           |   |     |
|-----|------------|----------------|--------|----|-----------|---|-----|
| 039 | MUC17      | non_synonymous | T3350R | 7  | 100684746 | C | S   |
| 017 | MUC2       | non_synonymous | T1728S | 11 | 1093364   | C | S   |
| 267 | MUC2       | non_synonymous | T1744M | 11 | 1093412   | C | Y   |
| 290 | MUC2       | non_synonymous | T1702S | 11 | 1093286   | C | S   |
| 322 | MUC2       | non_synonymous | T1564S | 11 | 1092872   | C | S   |
| 007 | MUC4       | non_synonymous | P4050T | 3  | 195506303 | G | K   |
| 680 | MUC4       | non_synonymous | S448C  | 3  | 195517108 | G | S   |
| 159 | MUC5B      | non_synonymous | T4887M | 11 | 1271225   | C | Y   |
| 100 | MYCT1      | non_synonymous | R127H  | 6  | 153043060 | G | R   |
| 181 | MYD88      | non_synonymous | L265P  | 3  | 38182641  | T | Y   |
| 785 | MYD88      | non_synonymous | L265P  | 3  | 38182641  | T | Y   |
| 197 | MYH1       | non_synonymous | R1348W | 17 | 10402082  | G | R   |
| 266 | MYH13      | non_synonymous | A1762V | 17 | 10210266  | G | R   |
| 090 | MYH2       | non_synonymous | H1934D | 17 | 10424623  | G | S   |
| 279 | MYH8       | non_synonymous | R26P   | 17 | 10323468  | C | S   |
| 009 | MYO1B      | non_synonymous | R96*   | 2  | 192194695 | C | Y   |
| 275 | MYOG       | non_synonymous | G88R   | 1  | 203054903 | C | S   |
| 027 | NAALADL2   | non_synonymous | G60D   | 3  | 174814715 | G | R   |
| 148 | NALCN      | non_synonymous | R372C  | 13 | 101936304 | G | R   |
| 280 | NALCN      | non_synonymous | H464R  | 13 | 101890149 | T | Y   |
| 043 | NAV2       | non_synonymous | T1810P | 11 | 20101690  | A | M   |
| 063 | NBEAL1     | non_synonymous | I2350V | 2  | 204064067 | A | R   |
| 045 | NBPF14     | non_synonymous | S844I  | 1  | 148004783 | C | M   |
| 053 | NCBP2      | non_synonymous | S161Y  | 3  | 196664391 | G | K   |
| 178 | NCR2       | non_synonymous | P195L  | 6  | 41309767  | C | Y   |
| 185 | NCRNA00164 | non_synonymous | R242H  | 2  | 132911157 | C | Y   |
| 041 | NF1        | non_synonymous | R2594P | 17 | 29684020  | G | S   |
| 110 | NF1        | non_synonymous | K1444N | 17 | 29585520  | G | S   |
| 174 | NFAT5      | non_synonymous | E214A  | 16 | 69681318  | A | M   |
| 016 | NFKBIE     | non_synonymous | E285*  | 6  | 44230329  | C | M   |
| 020 | NHS        | non_synonymous | L215P  | X  | 17705940  | T | Y   |
| 029 | NKAP       | non_synonymous | Y406*  | X  | 119059213 | G | S   |
| 136 | NLE1       | non_synonymous | V345G  | 17 | 33462448  | A | M   |
| 156 | NLN        | frameshift     | K693fs | 5  | 65118706  | * | -AG |
| 197 | NLN        | non_synonymous | A481V  | 5  | 65088397  | C | Y   |
| 090 | NLRC4      | non_synonymous | H797Y  | 2  | 32463333  | G | R   |
| 178 | NLRP4      | non_synonymous | L483F  | 19 | 56370208  | G | K   |
| 006 | NLRP5      | non_synonymous | V239M  | 19 | 56538314  | G | R   |
| 009 | NOD1       | non_synonymous | S376G  | 7  | 30491907  | T | Y   |
| 267 | NOL8       | non_synonymous | D945G  | 9  | 95068110  | T | Y   |
| 186 | NOP56      | non_synonymous | I262R  | 20 | 2636268   | T | K   |
| 272 | NPAT       | non_synonymous | I672V  | 11 | 108043697 | T | Y   |
| 013 | NPBWR2     | non_synonymous | T78M   | 20 | 62737952  | G | A   |
| 280 | NPEPL1     | non_synonymous | R474G  | 20 | 57290230  | C | S   |
| 029 | NPFFR2     | non_synonymous | V239A  | 4  | 73003838  | T | Y   |
| 275 | NPHP1      | non_synonymous | Q360K  | 2  | 110919224 | G | K   |
| 145 | NPHP4      | non_synonymous | V312L  | 1  | 6008188   | C | M   |
| 124 | NPS        | non_synonymous | Y37H   | 10 | 129350742 | T | Y   |
| 270 | NRG1       | non_synonymous | V489M  | 8  | 32621438  | G | R   |
| 155 | NRG2       | non_synonymous | V358I  | 5  | 139251346 | C | Y   |

|     |         |                |        |    |           |   |     |
|-----|---------|----------------|--------|----|-----------|---|-----|
| 141 | NRG3    | non_synonymous | D586H  | 10 | 84744954  | G | S   |
| 016 | NSD1    | non_synonymous | T2029A | 5  | 176710863 | A | R   |
| 185 | NTF3    | non_synonymous | R107Q  | 12 | 5603661   | G | R   |
| 197 | NTRK2   | non_synonymous | A199T  | 9  | 87338499  | G | R   |
| 174 | NUDT21  | non_synonymous | D72G   | 16 | 56481803  | T | Y   |
| 189 | NUSAP1  | non_synonymous | E7K    | 15 | 41625174  | G | R   |
| 023 | NXF1    | non_synonymous | K22*   | 11 | 62571415  | T | W   |
| 082 | NXF1    | non_synonymous | R78*   | 11 | 62571028  | G | R   |
| 083 | NXF1    | non_synonymous | L212R  | 11 | 62569215  | A | M   |
| 186 | NXN     | non_synonymous | R220Q  | 17 | 725651    | C | Y   |
| 761 | NXPH4   | non_synonymous | P273L  | 12 | 57619421  | C | T   |
| 040 | ODZ1    | non_synonymous | C1110R | X  | 123637527 | A | R   |
| 117 | ODZ1    | non_synonymous | K2174E | X  | 123518261 | T | Y   |
| 013 | ODZ2    | non_synonymous | S543*  | 5  | 167553768 | C | M   |
| 032 | ODZ2    | non_synonymous | S1760A | 5  | 167673813 | T | K   |
| 175 | OGN     | non_synonymous | I142K  | 9  | 95155370  | A | W   |
| 323 | OGT     | non_synonymous | F878L  | X  | 70787392  | T | Y   |
| 323 | OMG     | non_synonymous | M104K  | 17 | 29623039  | A | W   |
| 091 | OPCML   | non_synonymous | H9Y    | 11 | 131240726 | C | Y   |
| 172 | OPN1MW2 | non_synonymous | R268H  | X  | 153496075 | G | R   |
| 642 | OPRM1   | non_synonymous | R431C  | 6  | 154412548 | C | Y   |
| 618 | OR10AG1 | non_synonymous | V115M  | 11 | 55735597  | C | Y   |
| 006 | OR10C1  | non_synonymous | V115M  | 6  | 29385399  | G | R   |
| 032 | OR10G9  | non_synonymous | V221I  | 11 | 123894380 | G | R   |
| 642 | OR10K2  | non_synonymous | M288I  | 1  | 158389793 | C | M   |
| 145 | OR11H4  | non_synonymous | C207R  | 14 | 20711569  | T | Y   |
| 157 | OR2A12  | non_synonymous | V60D   | 7  | 143792379 | T | W   |
| 321 | OR2M2   | non_synonymous | I105M  | 1  | 248343602 | A | R   |
| 063 | OR2M4   | frameshift     | T76fs  | 1  | 248402457 | * | -CA |
| 182 | OR2M4   | non_synonymous | I74F   | 1  | 248402450 | A | W   |
| 785 | OR4C15  | non_synonymous | P36L   | 11 | 55321889  | C | Y   |
| 044 | OR4C6   | non_synonymous | R231W  | 11 | 55433333  | C | Y   |
| 178 | OR4K1   | non_synonymous | V103I  | 14 | 20404132  | G | R   |
| 030 | OR4N2   | non_synonymous | R122C  | 14 | 20295971  | C | Y   |
| 172 | OR4X1   | non_synonymous | V143M  | 11 | 48285839  | G | R   |
| 166 | OR51M1  | non_synonymous | C201S  | 11 | 5411230   | G | S   |
| 273 | OR52K1  | non_synonymous | T136M  | 11 | 4510537   | C | Y   |
| 159 | OR56A1  | non_synonymous | F114Y  | 11 | 6048594   | A | W   |
| 039 | OR5AU1  | non_synonymous | R323H  | 14 | 21623217  | C | Y   |
| 019 | OR5AZ1P | non_synonymous | V188I  | 11 | 57685141  | C | Y   |
| 274 | OR5B21  | non_synonymous | V196M  | 11 | 58274993  | C | Y   |
| 178 | OR5J2   | non_synonymous | A173G  | 11 | 55944611  | C | S   |
| 758 | OR6T1   | non_synonymous | R54C   | 11 | 123814386 | G | R   |
| 020 | OR7D2   | non_synonymous | G152S  | 19 | 9296911   | G | R   |
| 326 | OR7G2   | non_synonymous | T286S  | 19 | 9213127   | T | W   |
| 022 | OR8D2   | non_synonymous | K298N  | 11 | 124189200 | T | W   |
| 279 | OSBPL1A | non_synonymous | F248L  | 18 | 21897353  | A | W   |
| 159 | OTUD1   | non_synonymous | P379S  | 10 | 23729521  | C | T   |
| 193 | OXA1L   | non_synonymous | H252L  | 14 | 23239135  | A | W   |
| 052 | P2RY8   | non_synonymous | L220Q  | X  | 1584793   | A | W   |

|     |         |                |         |    |           |   |    |
|-----|---------|----------------|---------|----|-----------|---|----|
| 290 | PADI1   | non_synonymous | R58S    | 1  | 17548864  | C | M  |
| 282 | PAK7    | non_synonymous | S243R   | 20 | 9561053   | G | K  |
| 007 | PAPLN   | non_synonymous | D933E   | 14 | 73730428  | C | S  |
| 040 | PAPSS2  | splicing-site  | -       | 10 | 89473069  | T | W  |
| 758 | PARP15  | non_synonymous | I223S   | 3  | 122332012 | T | K  |
| 175 | PARVA   | non_synonymous | K323T   | 11 | 12539257  | A | M  |
| 082 | PCDH11X | non_synonymous | Y919H   | X  | 91133994  | T | Y  |
| 165 | PCDH11X | splicing-site  | -       | X  | 91518144  | T | K  |
| 323 | PCDH15  | non_synonymous | M269I   | 10 | 56077115  | C | Y  |
| 013 | PCDH18  | non_synonymous | M4I     | 4  | 138453231 | C | M  |
| 275 | PCDH24  | non_synonymous | V1175M  | 5  | 176017672 | G | R  |
| 044 | PCDHA13 | non_synonymous | D376Y   | 5  | 140262979 | G | K  |
| 178 | PCDHA2  | non_synonymous | V441M   | 5  | 140175870 | G | R  |
| 006 | PCDHA9  | non_synonymous | L409M   | 5  | 140229305 | C | M  |
| 091 | PCDHB13 | non_synonymous | A361V   | 5  | 140594777 | C | Y  |
| 091 | PCDHGC5 | non_synonymous | A91T    | 5  | 140793013 | G | R  |
| 168 | PCDHGC5 | non_synonymous | N169K   | 5  | 140724107 | C | M  |
| 041 | PCLO    | non_synonymous | E5018G  | 7  | 82390764  | T | Y  |
| 165 | PCLO    | frameshift     | T1689fs | 7  | 82585203  | * | +T |
| 175 | PCLO    | non_synonymous | L1107F  | 7  | 82595783  | T | W  |
| 280 | PCLO    | non_synonymous | L473R   | 7  | 82784539  | A | M  |
| 189 | PCMTD2  | splicing-site  | -       | 20 | 62899320  | G | S  |
| 157 | PCSK5   | non_synonymous | R111Q   | 9  | 78601082  | G | R  |
| 188 | PCSK5   | non_synonymous | R215H   | 9  | 78682882  | G | R  |
| 642 | PDE1C   | non_synonymous | T481P   | 7  | 31867930  | T | K  |
| 144 | PDZRN3  | non_synonymous | S790C   | 3  | 73433349  | T | W  |
| 044 | PENK    | non_synonymous | R229W   | 8  | 57353950  | G | R  |
| 785 | PEX10   | non_synonymous | V74I    | 1  | 2340271   | C | T  |
| 761 | PEX12   | non_synonymous | K42N    | 17 | 33904915  | C | S  |
| 019 | PHC2    | non_synonymous | Q119K   | 1  | 33836674  | G | K  |
| 266 | PHC2    | splicing-site  | -       | 1  | 33794611  | C | S  |
| 100 | PHF1    | non_synonymous | C110*   | 6  | 33380563  | T | W  |
| 039 | PHGDH   | splicing-site  | -       | 1  | 120279735 | A | G  |
| 155 | PKD1L1  | non_synonymous | P183S   | 7  | 47970891  | G | R  |
| 049 | PKD1L3  | non_synonymous | A103T   | 16 | 72032282  | C | Y  |
| 188 | PKHD1   | non_synonymous | R3620C  | 6  | 51524066  | G | R  |
| 618 | PLA2G4F | non_synonymous | T354A   | 15 | 42439966  | T | Y  |
| 064 | PLAT    | non_synonymous | V66M    | 8  | 42046509  | C | Y  |
| 264 | PLCB1   | non_synonymous | R101C   | 20 | 8608995   | C | Y  |
| 193 | PLCG1   | non_synonymous | E289G   | 20 | 39792094  | A | R  |
| 155 | PLEC1   | splicing-site  | -       | 8  | 145001576 | T | M  |
| 145 | PLEKHA5 | non_synonymous | D964N   | 12 | 19501339  | G | R  |
| 280 | PLEKHH1 | non_synonymous | R344C   | 14 | 68029378  | C | Y  |
| 375 | PNOC    | non_synonymous | L13V    | 8  | 28186711  | C | S  |
| 325 | PNPLA7  | non_synonymous | R426T   | 9  | 140400484 | C | S  |
| 328 | PNPLA7  | non_synonymous | E216*   | 9  | 140437114 | C | M  |
| 064 | PODNL1  | splicing-site  | -       | 19 | 14047274  | G | S  |
| 040 | POF1B   | frameshift     | Q197fs  | X  | 84600999  | * | -G |
| 124 | POF1B   | non_synonymous | I546T   | X  | 84558424  | A | G  |
| 007 | POLA1   | non_synonymous | M962L   | X  | 24767029  | A | W  |

|     |             |                |        |    |           |   |   |
|-----|-------------|----------------|--------|----|-----------|---|---|
| 194 | POLR2E      | splicing-site  | -      | 19 | 1090905   | T | M |
| 642 | POM121L2    | non_synonymous | P495T  | 6  | 27278467  | G | K |
| 188 | POSTN       | non_synonymous | G543E  | 13 | 38154030  | C | Y |
| 006 | POT1        | non_synonymous | Y223C  | 7  | 124499045 | T | Y |
| 013 | POT1        | non_synonymous | Y36N   | 7  | 124532338 | A | W |
| 044 | POT1        | splicing-site  | -      | 7  | 124537268 | A | W |
| 157 | POT1        | non_synonymous | Y66*   | 7  | 124511022 | A | M |
| 184 | POT1        | non_synonymous | M1L    | 7  | 124537227 | T | W |
| 083 | POTEH       | non_synonymous | C139Y  | 22 | 16287470  | C | Y |
| 274 | POU3F3      | non_synonymous | K430*  | 2  | 105473256 | A | W |
| 013 | POU3F4      | non_synonymous | R279C  | X  | 82764167  | C | Y |
| 328 | PPAN-P2RY11 | non_synonymous | V486D  | 19 | 10224486  | T | W |
| 145 | PPFIA2      | non_synonymous | R815W  | 12 | 81693139  | G | R |
| 186 | PPM1D       | non_synonymous | W154R  | 17 | 58678235  | T | W |
| 680 | PPP1R3A     | non_synonymous | L445I  | 7  | 113519868 | G | K |
| 321 | PQLC2       | splicing-site  | -      | 1  | 19655065  | G | S |
| 186 | PRAME       | non_synonymous | W244*  | 22 | 22892370  | C | Y |
| 761 | PRDM2       | non_synonymous | V1168M | 1  | 14107792  | G | R |
| 170 | PRDM6       | non_synonymous | G540R  | 5  | 122515962 | G | R |
| 020 | PRDM9       | non_synonymous | Y276F  | 5  | 23522939  | A | W |
| 100 | PRDM9       | non_synonymous | G307E  | 5  | 23523437  | G | R |
| 016 | PRG4        | non_synonymous | T901A  | 1  | 186277552 | A | R |
| 145 | PRKD1       | non_synonymous | A717D  | 14 | 30068249  | G | K |
| 175 | PRKG1       | non_synonymous | I684T  | 10 | 54053650  | T | Y |
| 029 | PRLR        | non_synonymous | R427K  | 5  | 35065780  | C | Y |
| 159 | PRLR        | non_synonymous | F501V  | 5  | 35065559  | A | M |
| 181 | PROK2       | non_synonymous | R122Q  | 3  | 71821900  | C | Y |
| 052 | PROM1       | non_synonymous | A772P  | 4  | 15985945  | C | S |
| 191 | PROM1       | non_synonymous | A766S  | 4  | 15985963  | C | M |
| 189 | PROSC       | non_synonymous | S46N   | 8  | 37623081  | G | R |
| 019 | PROX1       | non_synonymous | K611N  | 1  | 214178615 | G | K |
| 197 | PRPF19      | non_synonymous | T287P  | 11 | 60666746  | T | K |
| 018 | PRRG3       | splicing-site  | -      | X  | 150867295 | T | K |
| 152 | PRUNE2      | non_synonymous | A2922G | 9  | 79253180  | G | S |
| 324 | PSMD3       | non_synonymous | L160V  | 17 | 38142894  | C | S |
| 029 | PTDSS2      | non_synonymous | R151W  | 11 | 486954    | C | Y |
| 194 | PTGER2      | non_synonymous | W313*  | 14 | 52794034  | G | R |
| 009 | PTH2        | splicing-site  | -      | 19 | 49926467  | T | M |
| 063 | PTK2        | non_synonymous | D421E  | 8  | 141779690 | A | W |
| 090 | PTK7        | non_synonymous | R56Q   | 6  | 43096778  | G | R |
| 191 | PTPN11      | non_synonymous | A72V   | 12 | 112888199 | C | Y |
| 030 | PTPN13      | non_synonymous | L514R  | 4  | 87643520  | T | K |
| 170 | PTPRB       | non_synonymous | R1638K | 12 | 70949730  | C | Y |
| 181 | PTPRB       | non_synonymous | R1895W | 12 | 70933620  | G | R |
| 758 | PTPRM       | non_synonymous | D1436N | 18 | 8406107   | G | R |
| 282 | PTPRR       | non_synonymous | R77H   | 12 | 71286586  | C | Y |
| 194 | PZP         | non_synonymous | W864L  | 12 | 9316752   | C | M |
| 184 | QSER1       | non_synonymous | Q161*  | 11 | 32953672  | C | Y |
| 321 | RAB32       | non_synonymous | T215N  | 6  | 146875707 | C | M |
| 054 | RAB33A      | non_synonymous | S181L  | X  | 129318542 | C | Y |



|     |          |                |          |    |           |   |               |
|-----|----------|----------------|----------|----|-----------|---|---------------|
| 184 | RAB5A    | non_synonymous | D53G     | 3  | 19992372  | A | R             |
| 173 | RAG1     | non_synonymous | R759C    | 11 | 36597129  | C | Y             |
| 165 | RAI1     | frameshift     | Q280fs   | 17 | 17697101  | * | -G            |
| 159 | RALGPS2  | non_synonymous | I266V    | 1  | 178848087 | A | R             |
| 117 | RANBP17  | non_synonymous | T643M    | 5  | 170610233 | C | Y             |
| 048 | RANBP3L  | non_synonymous | L189S    | 5  | 36262059  | A | R             |
| 758 | RANBP9   | non_synonymous | S548L    | 6  | 13638070  | G | R             |
| 275 | RAP1GDS1 | non_synonymous | L299V    | 4  | 99338024  | T | K             |
| 091 | RAP2C    | non_synonymous | V153M    | X  | 131348291 | C | Y             |
| 082 | RAPH1    | non_synonymous | M428I    | 2  | 204322283 | C | M             |
| 100 | RASAL1   | splicing-site  | -        | 12 | 113565615 | T | M             |
| 323 | RASAL2   | non_synonymous | G1039R   | 1  | 178427542 | G | R             |
| 029 | RASEF    | non_synonymous | L177I    | 9  | 85670501  | G | K             |
| 040 | RASL11A  | non_synonymous | R125*    | 13 | 27847275  | C | Y             |
| 053 | RBM18    | non_synonymous | P26L     | 9  | 125023661 | G | R             |
| 124 | RBMX     | non_synonymous | P167A    | X  | 135958704 | G | S             |
| 785 | RDBP     | frameshift     | R219del4 | 6  | 31922440  | * | -GTCTCGATCCCG |
| 280 | RDH16    | non_synonymous | A237T    | 12 | 57346638  | C | Y             |
| 027 | REG1A    | non_synonymous | C36R     | 2  | 79348729  | T | Y             |
| 182 | REG1B    | non_synonymous | H103Q    | 2  | 79313505  | A | M             |
| 006 | RELN     | non_synonymous | D368N    | 7  | 103338341 | C | Y             |
| 172 | RELN     | non_synonymous | F1606I   | 7  | 103206791 | A | W             |
| 189 | REST     | non_synonymous | Y223*    | 4  | 57777473  | C | M             |
| 022 | RFTN1    | non_synonymous | G229E    | 3  | 16419365  | C | Y             |
| 172 | RFTN1    | non_synonymous | S255R    | 3  | 16419286  | G | S             |
| 030 | RGS22    | non_synonymous | P446L    | 8  | 101075659 | G | R             |
| 023 | RHCG     | splicing-site  | -        | 15 | 90015940  | T | M             |
| 043 | RHPN2    | non_synonymous | H357L    | 19 | 33493188  | T | W             |
| 054 | RICTOR   | non_synonymous | T1688I   | 5  | 38942996  | G | R             |
| 032 | RIF1     | non_synonymous | I1511T   | 2  | 152320566 | T | Y             |
| 018 | RIMBP2   | non_synonymous | D723A    | 12 | 130919313 | T | K             |
| 006 | RIMS2    | non_synonymous | P889T    | 8  | 105025773 | C | M             |
| 175 | RIMS2    | non_synonymous | S982G    | 8  | 105257236 | A | R             |
| 186 | RIMS2    | non_synonymous | D1127V   | 8  | 105263861 | A | W             |
| 785 | RIOK1    | non_synonymous | H348L    | 6  | 7405201   | A | W             |
| 007 | RIPK4    | non_synonymous | W300G    | 21 | 43166266  | A | M             |
| 322 | RND3     | non_synonymous | T155M    | 2  | 151328160 | G | R             |
| 005 | RNF103   | non_synonymous | G61E     | 2  | 86849828  | C | Y             |
| 680 | RNF103   | non_synonymous | P496S    | 2  | 86831538  | G | R             |
| 280 | RNF113A  | non_synonymous | R291H    | X  | 119004705 | C | Y             |
| 090 | RNF160   | non_synonymous | G9W      | 21 | 30365240  | C | M             |
| 051 | RNF217   | non_synonymous | R185H    | 6  | 125397951 | G | R             |
| 184 | RNF32    | non_synonymous | E292K    | 7  | 156469010 | G | R             |
| 008 | RNPC3    | non_synonymous | A70S     | 1  | 104070332 | G | K             |
| 264 | ROBO1    | non_synonymous | V146F    | 3  | 78987814  | C | M             |
| 044 | ROBO2    | non_synonymous | Q569K    | 3  | 77614127  | C | M             |
| 280 | ROR2     | non_synonymous | D51E     | 9  | 94538045  | G | K             |
| 189 | ROS1     | non_synonymous | Y1712S   | 6  | 117658448 | T | K             |
| 193 | ROS1     | non_synonymous | L933R    | 6  | 117687253 | A | M             |
| 264 | RP1      | non_synonymous | S1975I   | 8  | 55542366  | G | K             |

|     |              |                |        |    |           |   |     |
|-----|--------------|----------------|--------|----|-----------|---|-----|
| 022 | RP11-88G17.1 | non_synonymous | V170L  | 9  | 133057173 | G | K   |
| 141 | RP1L1        | non_synonymous | Q2017H | 8  | 10465557  | C | M   |
| 275 | RP4-788L13.1 | non_synonymous | R431T  | 1  | 99771566  | G | S   |
| 159 | RPS13P2      | non_synonymous | R99G   | 11 | 17097027  | G | S   |
| 270 | RPS15P5      | non_synonymous | G129V  | 19 | 1440409   | G | K   |
| 758 | RPS6KB2      | non_synonymous | S356G  | 11 | 67201866  | A | R   |
| 006 | RRBP1        | non_synonymous | A688V  | 20 | 17622563  | G | R   |
| 276 | RREB1        | non_synonymous | P1555L | 6  | 7247347   | C | Y   |
| 328 | RRP7A        | non_synonymous | N65S   | 22 | 42914033  | T | C   |
| 172 | RSPO2        | non_synonymous | R28C   | 8  | 109094785 | G | R   |
| 197 | RSPRY1       | non_synonymous | I522V  | 16 | 57269070  | A | R   |
| 322 | RSU1         | non_synonymous | N16D   | 10 | 16859035  | T | Y   |
| 049 | RTCD1        | non_synonymous | S67F   | 1  | 100733722 | C | Y   |
| 319 | RTTN         | non_synonymous | A607P  | 18 | 67833408  | C | S   |
| 321 | RTTN         | non_synonymous | Q1538* | 18 | 67741183  | G | R   |
| 090 | RYR2         | non_synonymous | A1488V | 1  | 237758830 | C | Y   |
| 194 | RYR2         | non_synonymous | R2125L | 1  | 237791320 | G | K   |
| 039 | RYR3         | non_synonymous | F3739L | 15 | 34118922  | C | M   |
| 328 | RYR3         | non_synonymous | R895L  | 15 | 33922145  | G | K   |
| 032 | SAG          | non_synonymous | A352T  | 2  | 234250924 | G | R   |
| 173 | SAMD9L       | non_synonymous | R828*  | 7  | 92762803  | G | R   |
| 189 | SCAMP5       | non_synonymous | P83L   | 15 | 75309045  | C | Y   |
| 282 | SCCPDH       | splicing-site  | -      | 1  | 246923471 | A | W   |
| 761 | SCLY         | non_synonymous | A223T  | 2  | 238990716 | G | R   |
| 064 | SCN2A        | non_synonymous | E1373D | 2  | 166231341 | G | K   |
| 194 | SCN2B        | non_synonymous | R137H  | 11 | 118038838 | C | T   |
| 017 | SCN3B        | non_synonymous | L10P   | 11 | 123524481 | A | R   |
| 124 | SCN4A        | non_synonymous | K1341* | 17 | 62020453  | T | W   |
| 030 | SCN5A        | non_synonymous | R1512W | 3  | 38597155  | G | R   |
| 270 | SCN8A        | non_synonymous | V755A  | 12 | 52145271  | T | Y   |
| 172 | SEC14L2      | non_synonymous | H280N  | 22 | 30812003  | C | M   |
| 044 | SECISBP2     | non_synonymous | K15R   | 9  | 91934574  | A | R   |
| 155 | SEMA3C       | non_synonymous | E238K  | 7  | 80434955  | C | Y   |
| 005 | SENP2        | splicing-site  | -      | 3  | 185337291 | G | R   |
| 023 | SERPINA7     | non_synonymous | S373L  | X  | 105277621 | G | A   |
| 054 | SETD1A       | non_synonymous | Y370C  | 16 | 30976172  | A | R   |
| 006 | SF3B1        | non_synonymous | N626Y  | 2  | 198267481 | T | W   |
| 009 | SF3B1        | non_synonymous | K700E  | 2  | 198266834 | T | Y   |
| 019 | SF3B1        | non_synonymous | V701F  | 2  | 198266831 | C | M   |
| 029 | SF3B1        | non_synonymous | K700E  | 2  | 198266834 | T | Y   |
| 053 | SF3B1        | non_synonymous | T663I  | 2  | 198267369 | G | R   |
| 083 | SF3B1        | non_synonymous | D894G  | 2  | 198265476 | T | Y   |
| 156 | SF3B1        | non_synonymous | K700E  | 2  | 198266834 | T | Y   |
| 182 | SF3B1        | non_synonymous | N626Y  | 2  | 198267481 | T | W   |
| 197 | SF3B1        | non_synonymous | G742D  | 2  | 198266611 | C | Y   |
| 758 | SF3B1        | non_synonymous | K700E  | 2  | 198266834 | T | Y   |
| 100 | SFRS1        | frameshift     | G4fs   | 17 | 56084489  | * | -T  |
| 274 | SFRS1        | non_synonymous | Y82*   | 17 | 56083837  | G | S   |
| 282 | SFRS7        | non_synonymous | L18Q   | 2  | 38977312  | A | W   |
| 321 | SGCG         | frameshift     | S84fs  | 13 | 23808805  | * | -AG |

|     |         |                |         |    |           |   |      |
|-----|---------|----------------|---------|----|-----------|---|------|
| 174 | SGIP1   | non_synonymous | G575D   | 1  | 67184977  | G | R    |
| 322 | SH3RF2  | non_synonymous | R201*   | 5  | 145379843 | C | T    |
| 016 | SHANK1  | frameshift     | S638ins | 19 | 51200870  | * | +AGC |
| 016 | SHPRH   | non_synonymous | M710V   | 6  | 146264389 | T | Y    |
| 006 | SI      | non_synonymous | R91T    | 3  | 164786967 | C | S    |
| 043 | SI      | non_synonymous | T1680I  | 3  | 164709210 | G | R    |
| 048 | SI      | non_synonymous | W1493C  | 3  | 164716389 | C | M    |
| 100 | SI      | non_synonymous | D1193N  | 3  | 164735605 | C | Y    |
| 043 | SIK2    | non_synonymous | I595T   | 11 | 111591626 | T | Y    |
| 146 | SIRT4   | non_synonymous | R156C   | 12 | 120741830 | C | Y    |
| 019 | SKAP2   | non_synonymous | V240I   | 7  | 26765125  | C | Y    |
| 322 | SKIV2L2 | non_synonymous | R200H   | 5  | 54635921  | G | R    |
| 193 | SLA     | splicing-site  | -       | 8  | 134060179 | G | S    |
| 680 | SLC12A4 | non_synonymous | L158F   | 16 | 67991818  | G | R    |
| 117 | SLC12A5 | splicing-site  | -       | 20 | 44664415  | G | A    |
| 083 | SLC16A2 | non_synonymous | C283Y   | X  | 73744244  | G | R    |
| 325 | SLC1A3  | non_synonymous | I465T   | 5  | 36684070  | T | Y    |
| 375 | SLC24A5 | non_synonymous | I181V   | 15 | 48427132  | A | R    |
| 184 | SLC38A6 | non_synonymous | L418H   | 14 | 61518816  | T | W    |
| 049 | SLC44A4 | non_synonymous | P403L   | 6  | 31836957  | G | A    |
| 188 | SLC45A1 | non_synonymous | R301*   | 1  | 8390352   | C | Y    |
| 029 | SLC47A1 | non_synonymous | R333Q   | 17 | 19463577  | G | R    |
| 039 | SLC4A10 | non_synonymous | S615C   | 2  | 162762244 | C | S    |
| 197 | SLC4A10 | non_synonymous | Q220E   | 2  | 162719464 | C | S    |
| 280 | SLC4A10 | non_synonymous | R799L   | 2  | 162807213 | G | K    |
| 181 | SLC4A8  | non_synonymous | N1068D  | 12 | 51890948  | A | R    |
| 090 | SLC6A5  | non_synonymous | S410A   | 11 | 20639398  | T | K    |
| 680 | SLC7A3  | non_synonymous | R600H   | X  | 70145724  | C | Y    |
| 375 | SLC7A6  | non_synonymous | R348Q   | 16 | 68328628  | G | R    |
| 680 | SLC9A11 | non_synonymous | L84H    | 1  | 173567149 | A | W    |
| 016 | SLCO1B1 | non_synonymous | P484H   | 12 | 21358921  | C | M    |
| 642 | SLCO1B1 | non_synonymous | I97T    | 12 | 21327574  | T | Y    |
| 019 | SLITRK3 | non_synonymous | E813K   | 3  | 164906182 | C | Y    |
| 181 | SLITRK6 | non_synonymous | L12P    | 13 | 86370609  | A | R    |
| 090 | SMARCD3 | non_synonymous | D351N   | 7  | 150937320 | C | Y    |
| 045 | SNAP91  | frameshift     | E224fs  | 6  | 84350910  | * | +A   |
| 185 | SNTG2   | non_synonymous | D174H   | 2  | 1168798   | G | S    |
| 049 | SNX13   | non_synonymous | N723S   | 7  | 17854497  | T | Y    |
| 018 | SNX7    | non_synonymous | T232P   | 1  | 99161128  | A | M    |
| 090 | SP140   | non_synonymous | R380P   | 2  | 231134655 | G | S    |
| 083 | SPA17   | non_synonymous | V116A   | 11 | 124564233 | T | Y    |
| 170 | SPAG17  | non_synonymous | R1641S  | 1  | 118539123 | C | M    |
| 048 | SPAG4L  | non_synonymous | E178G   | 20 | 31583426  | T | Y    |
| 264 | SPC24   | non_synonymous | R106G   | 19 | 11258783  | T | Y    |
| 043 | SPHKAP  | non_synonymous | A930T   | 2  | 228882782 | C | Y    |
| 323 | SPHKAP  | non_synonymous | Q986*   | 2  | 228882614 | G | R    |
| 159 | SPRR1B  | non_synonymous | P43A    | 1  | 153004948 | C | S    |
| 278 | SPRY3   | non_synonymous | P34L    | X  | 155003634 | C | Y    |
| 280 | SPRY3   | non_synonymous | M225I   | X  | 155004208 | G | R    |
| 276 | SPTBN1  | non_synonymous | R681W   | 2  | 54856312  | C | Y    |

|     |            |                |        |    |           |   |     |
|-----|------------|----------------|--------|----|-----------|---|-----|
| 186 | SRFBP1     | non_synonymous | S303L  | 5  | 121356338 | C | Y   |
| 110 | SRRT       | non_synonymous | G135D  | 7  | 100479679 | G | R   |
| 090 | SSPO       | non_synonymous | A4542T | 7  | 149521545 | G | R   |
| 159 | ST6GALNAC1 | non_synonymous | T179M  | 17 | 74625389  | G | R   |
| 019 | STARD9     | non_synonymous | M2280L | 15 | 42980872  | A | W   |
| 188 | STAT6      | splicing-site  | -      | 12 | 57496281  | A | G   |
| 197 | STK36      | non_synonymous | L1147V | 2  | 219563706 | C | S   |
| 172 | STOX2      | non_synonymous | I697K  | 4  | 184932081 | T | W   |
| 290 | SULT1C2    | non_synonymous | S132P  | 2  | 108917368 | T | Y   |
| 194 | SULT2A1    | non_synonymous | V236A  | 19 | 48377952  | A | R   |
| 194 | SUSD4      | non_synonymous | T290P  | 1  | 223402593 | T | K   |
| 043 | SVIL       | non_synonymous | E147K  | 10 | 29839914  | C | Y   |
| 618 | SWAP70     | frameshift     | L207fs | 11 | 9746411   | * | +A  |
| 040 | SYN3       | non_synonymous | V146M  | 22 | 33327400  | C | Y   |
| 642 | SYNC       | non_synonymous | D338H  | 1  | 33160687  | C | S   |
| 272 | SYNE1      | non_synonymous | M4357I | 6  | 152652749 | C | M   |
| 063 | SYNPO2     | non_synonymous | T601S  | 4  | 119951732 | C | S   |
| 124 | SYT17      | non_synonymous | R28W   | 16 | 19184800  | C | Y   |
| 016 | TAAR6      | non_synonymous | K258N  | 6  | 132892234 | A | M   |
| 052 | TADA3L     | non_synonymous | Q266*  | 3  | 9828704   | G | R   |
| 141 | TAF2       | non_synonymous | L994M  | 8  | 120759073 | A | W   |
| 178 | TAF4B      | non_synonymous | K288M  | 18 | 23854998  | A | W   |
| 175 | TAL1       | non_synonymous | A159D  | 1  | 47689747  | G | K   |
| 040 | TAS2R16    | non_synonymous | H209Y  | 7  | 122635064 | G | R   |
| 181 | TBC1D12    | non_synonymous | R431*  | 10 | 96253201  | C | Y   |
| 181 | TBC1D16    | non_synonymous | R482C  | 17 | 77922768  | G | R   |
| 270 | TBC1D8     | non_synonymous | H759P  | 2  | 101644841 | T | K   |
| 157 | TBPL1      | non_synonymous | S73R   | 6  | 134303787 | A | M   |
| 175 | TCF7L1     | non_synonymous | M292T  | 2  | 85532412  | T | Y   |
| 124 | TCF7L2     | non_synonymous | R119Q  | 10 | 114920413 | G | R   |
| 174 | TCL1A      | splicing-site  | -      | 14 | 96180283  | G | Y   |
| 039 | TDRD1      | non_synonymous | N65K   | 10 | 115947785 | C | M   |
| 124 | TDRD6      | non_synonymous | K1519N | 6  | 46660422  | A | W   |
| 009 | TDRD9      | non_synonymous | E258K  | 14 | 104436884 | G | R   |
| 013 | TEAD2      | frameshift     | P144fs | 19 | 49858606  | * | -GC |
| 017 | TECTA      | non_synonymous | N886S  | 11 | 121000636 | A | R   |
| 264 | TEKT2      | non_synonymous | E48K   | 1  | 36550664  | G | R   |
| 266 | TET1       | non_synonymous | P307H  | 10 | 70333015  | C | M   |
| 188 | TET2       | non_synonymous | S1563F | 4  | 106196355 | C | Y   |
| 152 | TET3       | non_synonymous | R443H  | 2  | 74274651  | G | R   |
| 156 | TFEB       | non_synonymous | N327S  | 6  | 41655496  | T | Y   |
| 082 | TGFBR3     | non_synonymous | R564*  | 1  | 92182142  | G | R   |
| 082 | TGIF2LX    | non_synonymous | E204*  | X  | 89177694  | G | K   |
| 117 | THNSL1     | non_synonymous | V480I  | 10 | 25313590  | G | R   |
| 091 | TIE1       | non_synonymous | V765M  | 1  | 43779523  | G | R   |
| 785 | TIMD4      | non_synonymous | G374D  | 5  | 156346484 | C | Y   |
| 191 | TINAG      | non_synonymous | R191L  | 6  | 54191662  | G | K   |
| 045 | TLR2       | non_synonymous | D327V  | 4  | 154625039 | A | W   |
| 280 | TLR2       | non_synonymous | D327V  | 4  | 154625039 | A | W   |
| 042 | TLR5       | non_synonymous | N96K   | 1  | 223286086 | G | K   |

|     |           |                |          |    |           |   |         |
|-----|-----------|----------------|----------|----|-----------|---|---------|
| 280 | TLR6      | non_synonymous | P403S    | 4  | 38829888  | G | R       |
| 064 | TMC2      | non_synonymous | N434S    | 20 | 2582835   | A | R       |
| 275 | TMCO5B    | non_synonymous | T248I    | 15 | 33528132  | G | R       |
| 032 | TMEM106C  | non_synonymous | P108L    | 12 | 48359692  | C | Y       |
| 044 | TMEM131   | non_synonymous | S1256C   | 2  | 98409226  | G | S       |
| 189 | TMEM132A  | non_synonymous | V798G    | 11 | 60703697  | T | G       |
| 159 | TMEM132D  | non_synonymous | V304M    | 12 | 130184413 | C | Y       |
| 006 | TMEM194A  | non_synonymous | S152N    | 12 | 57464474  | C | Y       |
| 141 | TMEM63B   | non_synonymous | G783R    | 6  | 44122468  | G | R       |
| 192 | TMEM87B   | non_synonymous | I466V    | 2  | 112858218 | A | R       |
| 290 | TMPRSS11D | non_synonymous | R6G      | 4  | 68725389  | G | S       |
| 324 | TMPRSS12  | non_synonymous | I304F    | 12 | 51281159  | A | W       |
| 264 | TMTC2     | non_synonymous | K378E    | 12 | 83290074  | A | R       |
| 785 | TMTC2     | non_synonymous | E765G    | 12 | 83455573  | A | R       |
| 083 | TNFSF15   | non_synonymous | E164D    | 9  | 117552996 | T | W       |
| 324 | TNIK      | non_synonymous | F1046L   | 3  | 170801977 | A | R       |
| 280 | TOMM40    | non_synonymous | V190G    | 19 | 45397249  | T | K       |
| 159 | TOPBP1    | non_synonymous | G202R    | 3  | 133374272 | C | S       |
| 178 | TOR1A     | non_synonymous | M204T    | 9  | 132581129 | A | R       |
| 618 | TP53      | splicing-site  | -        | 17 | 7576851   | T | G       |
| 155 | TPCN1     | non_synonymous | V586M    | 12 | 113724805 | G | R       |
| 007 | TPSAB1    | non_synonymous | G30V     | 16 | 1291160   | G | K       |
| 274 | TPTTE     | non_synonymous | R507W    | 21 | 10908826  | T | W       |
| 082 | TRAF1     | non_synonymous | N379S    | 9  | 123667413 | T | Y       |
| 042 | TRAPPC9   | non_synonymous | G122V    | 8  | 141461402 | C | M       |
| 019 | TRHR      | non_synonymous | F363Y    | 8  | 110131575 | T | W       |
| 146 | TRIM29    | non_synonymous | F194I    | 11 | 120008160 | A | W       |
| 264 | TRIM46    | non_synonymous | E368D    | 1  | 155150672 | A | T       |
| 321 | TRIM55    | non_synonymous | A437V    | 8  | 67066355  | C | Y       |
| 185 | TRIM64C   | non_synonymous | V366A    | 11 | 49075513  | A | R       |
| 618 | TRIML1    | non_synonymous | M7L      | 4  | 189060731 | A | M       |
| 618 | TRIO      | non_synonymous | R1982H   | 5  | 14472733  | G | R       |
| 324 | TRIOBP    | non_synonymous | R679Q    | 22 | 38120599  | G | R       |
| 270 | TRMU      | non_synonymous | D172H    | 22 | 46746223  | G | S       |
| 040 | TRO       | frameshift     | V878fs   | X  | 54955790  | * | -C      |
| 040 | TRO       | frameshift     | F879del2 | X  | 54955792  | * | -TCAGCA |
| 197 | TRO       | non_synonymous | L1113F   | X  | 54956494  | C | Y       |
| 174 | TRPA1     | non_synonymous | Q1000K   | 8  | 72938248  | G | K       |
| 178 | TRPC4     | non_synonymous | R699S    | 13 | 38213434  | C | S       |
| 041 | TRPM1     | non_synonymous | A165P    | 15 | 31359325  | C | S       |
| 188 | TTC7B     | splicing-site  | -        | 14 | 91077185  | A | W       |
| 264 | TTC9B     | non_synonymous | A188T    | 19 | 40723142  | C | Y       |
| 155 | TTLL9     | splicing-site  | -        | 20 | 30496392  | A | M       |
| 170 | TTN       | non_synonymous | H28851R  | 2  | 179411996 | T | Y       |
| 170 | TTN       | non_synonymous | R12194*  | 2  | 179494168 | G | R       |
| 274 | TTN       | non_synonymous | T2963P   | 2  | 179634421 | T | K       |
| 758 | TUBA1     | non_synonymous | V181M    | 2  | 220115880 | C | Y       |
| 192 | TUBA3C    | non_synonymous | F138L    | 13 | 19751711  | A | R       |
| 274 | TUBGCP6   | non_synonymous | K1635T   | 22 | 50656967  | T | K       |
| 328 | TXNDC3    | non_synonymous | T240S    | 7  | 37907400  | A | W       |

|     |         |                |          |    |           |   |                   |
|-----|---------|----------------|----------|----|-----------|---|-------------------|
| 016 | U2AF2   | non_synonymous | Q190L    | 19 | 56173950  | A | W                 |
| 275 | U2AF2   | non_synonymous | Q143L    | 19 | 56172497  | A | W                 |
| 172 | UBE2Q1  | non_synonymous | V136G    | 1  | 154528361 | A | M                 |
| 272 | UGCGL1  | non_synonymous | Q1462*   | 2  | 128944281 | C | Y                 |
| 044 | UGT2B4  | non_synonymous | I331V    | 4  | 70355168  | T | Y                 |
| 267 | UGT8    | non_synonymous | R187C    | 4  | 115544595 | C | Y                 |
| 029 | UMODL1  | non_synonymous | N266S    | 21 | 43510414  | A | R                 |
| 032 | UNC13C  | non_synonymous | R1343*   | 15 | 54590047  | C | Y                 |
| 189 | UNC13C  | non_synonymous | D923E    | 15 | 54307869  | T | W                 |
| 041 | UNC5D   | non_synonymous | V319I    | 8  | 35544098  | G | R                 |
| 324 | UNC5D   | non_synonymous | A724V    | 8  | 35608320  | C | Y                 |
| 019 | UNQ9391 | non_synonymous | A151T    | 8  | 10388908  | G | R                 |
| 053 | UPP2    | splicing-site  | -        | 2  | 158971611 | A | W                 |
| 040 | URM1    | frameshift     | G13del5  | 9  | 131140316 | * | -GTGGTGC GGAGCTCC |
| 039 | USH2A   | non_synonymous | N1596H   | 1  | 216262454 | T | K                 |
| 157 | USH2A   | non_synonymous | T2310M   | 1  | 216143995 | G | R                 |
| 013 | USP13   | non_synonymous | S356N    | 3  | 179439356 | G | R                 |
| 064 | USP49   | non_synonymous | P476S    | 6  | 41771679  | G | R                 |
| 323 | USP53   | non_synonymous | R580Q    | 4  | 120192754 | G | R                 |
| 082 | USP9X   | non_synonymous | M1916V   | X  | 41075566  | A | R                 |
| 188 | VCAN    | non_synonymous | G838E    | 5  | 82816638  | G | R                 |
| 189 | VDR     | non_synonymous | R402P    | 12 | 48238608  | C | S                 |
| 022 | VIL2    | non_synonymous | T25A     | 6  | 159210343 | T | Y                 |
| 156 | VILL    | splicing-site  | -        | 3  | 38043086  | T | K                 |
| 194 | VILL    | non_synonymous | S618P    | 3  | 38045792  | T | Y                 |
| 325 | VIPR2   | non_synonymous | R98W     | 7  | 158889543 | G | R                 |
| 189 | VIT     | splicing-site  | -        | 2  | 37036130  | T | G                 |
| 022 | VOPP1   | splicing-site  | -        | 7  | 55605250  | T | M                 |
| 193 | VPRBP   | non_synonymous | D1005G   | 3  | 51457410  | T | Y                 |
| 290 | VPRBP   | non_synonymous | I77L     | 3  | 51500851  | T | K                 |
| 110 | VSTM2A  | non_synonymous | M165R    | 7  | 54617723  | T | K                 |
| 159 | VSTM2L  | non_synonymous | G66S     | 20 | 36560111  | G | R                 |
| 145 | VWA2    | frameshift     | R676ins3 | 10 | 116049152 | * | +GGAGGCTTG        |
| 032 | VWA3A   | non_synonymous | R1134C   | 16 | 22163878  | C | Y                 |
| 041 | VWA3B   | splicing-site  | -        | 2  | 98804436  | A | W                 |
| 280 | WAS     | splicing-site  | -        | X  | 48546844  | T | G                 |
| 264 | WBP1    | non_synonymous | T144A    | 2  | 74687155  | A | R                 |
| 174 | WDFY4   | non_synonymous | V400I    | 10 | 49939223  | G | R                 |
| 020 | WDR24   | non_synonymous | R371H    | 16 | 737354    | C | Y                 |
| 194 | WDR24   | splicing-site  | -        | 16 | 737825    | T | M                 |
| 016 | WDR40C  | non_synonymous | W196L    | X  | 125299321 | C | A                 |
| 280 | WDR42B  | non_synonymous | N272I    | X  | 27998637  | T | W                 |
| 194 | WDR45   | non_synonymous | H60P     | X  | 48932381  | T | K                 |
| 272 | WDR59   | non_synonymous | K630R    | 16 | 74927688  | T | Y                 |
| 761 | WDR63   | non_synonymous | L380I    | 1  | 85560203  | C | M                 |
| 785 | WFIKKN2 | non_synonymous | V82I     | 17 | 48916893  | G | R                 |
| 324 | WFS1    | non_synonymous | P885S    | 4  | 6304175   | C | Y                 |
| 009 | WNT2    | non_synonymous | D226N    | 7  | 116937843 | C | Y                 |
| 758 | WRNIP1  | splicing-site  | -        | 6  | 2769118   | T | W                 |
| 178 | XIRP2   | non_synonymous | L557M    | 2  | 168099571 | C | M                 |

|     |         |                |         |    |           |   |     |
|-----|---------|----------------|---------|----|-----------|---|-----|
| 053 | XPO1    | non_synonymous | E571K   | 2  | 61719472  | C | Y   |
| 270 | XPO1    | non_synonymous | E571V   | 2  | 61719471  | T | W   |
| 197 | XPOT    | non_synonymous | I848N   | 12 | 64828377  | T | W   |
| 032 | YLPM1   | non_synonymous | S660L   | 14 | 75248725  | C | Y   |
| 117 | YTHDF3  | non_synonymous | T559I   | 8  | 64100239  | C | Y   |
| 173 | YY1AP1  | non_synonymous | H131Q   | 1  | 155657863 | G | S   |
| 016 | ZBTB38  | non_synonymous | P643S   | 3  | 141163154 | C | Y   |
| 276 | ZBTB9   | non_synonymous | K46T    | 6  | 33423014  | A | M   |
| 051 | ZC3H12C | non_synonymous | R611H   | 11 | 110035639 | G | R   |
| 170 | ZC3H13  | non_synonymous | R840H   | 13 | 46544550  | C | Y   |
| 018 | ZEB1    | non_synonymous | R181H   | 10 | 31799661  | G | R   |
| 023 | ZFHx4   | non_synonymous | P3079S  | 8  | 77768440  | C | Y   |
| 270 | ZFP30   | non_synonymous | H176Q   | 19 | 38126914  | A | M   |
| 168 | ZFPM2   | non_synonymous | L632F   | 8  | 106814206 | A | M   |
| 273 | ZFYVE16 | non_synonymous | N925D   | 5  | 79743893  | A | R   |
| 267 | ZHX1    | non_synonymous | V206I   | 8  | 124267571 | C | Y   |
| 264 | ZMYM1   | non_synonymous | P116R   | 1  | 35563095  | C | S   |
| 016 | ZMYM3   | non_synonymous | L1142V  | X  | 70463693  | G | C   |
| 039 | ZMYM3   | non_synonymous | V850M   | X  | 70466233  | C | T   |
| 274 | ZNF133  | non_synonymous | K422T   | 20 | 18296718  | A | M   |
| 326 | ZNF205  | non_synonymous | E452D   | 16 | 3170017   | G | S   |
| 326 | ZNF205  | non_synonymous | C456S   | 16 | 3170027   | T | W   |
| 159 | ZNF28   | non_synonymous | T643N   | 19 | 53303170  | G | K   |
| 063 | ZNF285B | non_synonymous | K61T    | 19 | 44892225  | T | K   |
| 165 | ZNF292  | frameshift     | L1011fs | 6  | 87966379  | * | -CA |
| 041 | ZNF324  | non_synonymous | V8G     | 19 | 58980575  | T | K   |
| 064 | ZNF333  | non_synonymous | K476N   | 19 | 14829567  | G | K   |
| 030 | ZNF337  | non_synonymous | D116N   | 20 | 25657578  | C | Y   |
| 043 | ZNF343  | non_synonymous | P548S   | 20 | 2463965   | G | R   |
| 272 | ZNF366  | non_synonymous | L289P   | 5  | 71756458  | A | R   |
| 043 | ZNF383  | non_synonymous | H332R   | 19 | 37734133  | A | R   |
| 145 | ZNF385A | non_synonymous | A256V   | 12 | 54764778  | G | R   |
| 319 | ZNF430  | non_synonymous | V72A    | 19 | 21216380  | T | Y   |
| 033 | ZNF498  | non_synonymous | E83V    | 7  | 99217477  | A | W   |
| 185 | ZNF507  | non_synonymous | I14T    | 19 | 32843777  | T | Y   |
| 030 | ZNF530  | non_synonymous | T458A   | 19 | 58118265  | A | R   |
| 063 | ZNF536  | non_synonymous | N613I   | 19 | 30936307  | A | W   |
| 178 | ZNF572  | non_synonymous | M31V    | 8  | 125988601 | A | R   |
| 188 | ZNF586  | non_synonymous | P121S   | 19 | 58290316  | C | Y   |
| 282 | ZNF615  | non_synonymous | R509C   | 19 | 52496837  | G | R   |
| 276 | ZNF667  | non_synonymous | P95R    | 19 | 56973735  | G | S   |
| 042 | ZNF668  | non_synonymous | V476G   | 16 | 31072822  | A | M   |
| 270 | ZNF676  | non_synonymous | K311E   | 19 | 22363684  | T | Y   |
| 758 | ZNF711  | non_synonymous | R284*   | X  | 84520195  | C | T   |
| 145 | ZNF730  | non_synonymous | H334R   | 19 | 23328847  | A | R   |
| 022 | ZNF81   | non_synonymous | G270E   | X  | 47774854  | G | R   |
| 039 | ZNF99   | non_synonymous | S599L   | 19 | 22940642  | G | R   |
| 270 | ZNF99   | non_synonymous | L959F   | 19 | 22939296  | G | R   |
| 033 | ZRSR2   | splicing-site  | -       | X  | 15827321  | A | R   |
| 040 | ZW10    | non_synonymous | G637E   | 11 | 113608400 | C | Y   |

**Supplementary Table 6.** RM-CLL genes

| Class 1  |       |      |      |     |     |     |     |     |     |     |
|----------|-------|------|------|-----|-----|-----|-----|-----|-----|-----|
| Gene     | Cases |      |      |     |     |     |     |     |     |     |
| ADAM2    | 013   | 039  |      |     |     |     |     |     |     |     |
| ALS2CL   | 173   | 270  |      |     |     |     |     |     |     |     |
| ARHGAP28 | 013   | 110  |      |     |     |     |     |     |     |     |
| ASXL1    | 030   | 145  | 182  |     |     |     |     |     |     |     |
| ATM      | 006   | 020  | 048  | 145 |     |     |     |     |     |     |
| BRAF     | 148   | 279  |      |     |     |     |     |     |     |     |
| BRUNOL4  | 171   | 785  |      |     |     |     |     |     |     |     |
| C12orf64 | 006   | 322  |      |     |     |     |     |     |     |     |
| CD36     | 181   | 273  |      |     |     |     |     |     |     |     |
| CDH9     | 324   | CLL2 |      |     |     |     |     |     |     |     |
| CHD2     | 007   | 043  | 175  | 181 | 185 |     |     |     |     |     |
| CNOT3    | 194   | CLL1 |      |     |     |     |     |     |     |     |
| COL25A1  | 054   | 194  |      |     |     |     |     |     |     |     |
| CSMD3    | 043   | 117  | 168  | 279 |     |     |     |     |     |     |
| CYP2A7   | 033   | CLL1 |      |     |     |     |     |     |     |     |
| DDX3X    | 188   | 328  |      |     |     |     |     |     |     |     |
| DPP6     | 266   | 323  |      |     |     |     |     |     |     |     |
| DTNA     | 013   | 170  |      |     |     |     |     |     |     |     |
| EGR2     | 082   | 290  |      |     |     |     |     |     |     |     |
| EPHB1    | 178   | 270  |      |     |     |     |     |     |     |     |
| FAM117A  | 185   | 324  |      |     |     |     |     |     |     |     |
| FGFR2    | 064   | 278  |      |     |     |     |     |     |     |     |
| FSTL5    | 264   | 280  |      |     |     |     |     |     |     |     |
| FUBP1    | 016   | 270  |      |     |     |     |     |     |     |     |
| GNAT1    | 136   | 282  |      |     |     |     |     |     |     |     |
| KCNAB1   | 032   | 273  |      |     |     |     |     |     |     |     |
| LPHN3    | 053   | 082  | 091  |     |     |     |     |     |     |     |
| LRP1B    | 005   | 274  | 276  | 322 | 326 |     |     |     |     |     |
| LUZP2    | 170   | 290  |      |     |     |     |     |     |     |     |
| MUC2     | 017   | 267  | 290  | 322 |     |     |     |     |     |     |
| MYD88    | 181   | 785  | CLL3 |     |     |     |     |     |     |     |
| NLN      | 156   | 197  |      |     |     |     |     |     |     |     |
| NOTCH1   | 019   | 048  | 156  | 184 | 321 |     |     |     |     |     |
| NXF1     | 023   | 082  | 083  |     |     |     |     |     |     |     |
| OR2M4    | 063   | 182  |      |     |     |     |     |     |     |     |
| PCDHGC5  | 091   | 168  |      |     |     |     |     |     |     |     |
| PHC2     | 019   | 266  |      |     |     |     |     |     |     |     |
| POF1B    | 040   | 124  |      |     |     |     |     |     |     |     |
| POT1     | 006   | 013  | 044  | 157 | 184 |     |     |     |     |     |
| PRDM9    | 020   | 100  |      |     |     |     |     |     |     |     |
| PRLR     | 029   | 159  |      |     |     |     |     |     |     |     |
| PROM1    | 052   | 191  |      |     |     |     |     |     |     |     |
| RFTN1    | 022   | 172  |      |     |     |     |     |     |     |     |
| RIMS2    | 006   | 175  | 186  |     |     |     |     |     |     |     |
| RNF103   | 005   | 680  |      |     |     |     |     |     |     |     |
| SF3B1    | 006   | 009  | 019  | 029 | 053 | 083 | 156 | 182 | 197 | 758 |



|                |              |      |     |     |
|----------------|--------------|------|-----|-----|
| SFRS1          | 100          | 274  |     |     |
| SI             | 006          | 043  | 048 | 100 |
| SLC4A10        | 039          | 197  | 280 |     |
| SLCO1B1        | 016          | 642  |     |     |
| SNX7           | 018          | CLL4 |     |     |
| SPRY3          | 278          | 280  |     |     |
| TLR2           | 045          | 280  |     |     |
| TMTC2          | 264          | 785  |     |     |
| TRO            | 040          | 197  |     |     |
| U2AF2          | 016          | 275  |     |     |
| UNC5D          | 041          | 324  |     |     |
| VILL           | 156          | 194  |     |     |
| WDR24          | 020          | 194  |     |     |
| XPO1           | 053          | 270  |     |     |
| <b>Class 2</b> |              |      |     |     |
| <b>Gene</b>    | <b>Cases</b> |      |     |     |
| AKAP6          | 110          | 189  |     |     |
| C2orf21        | 141          | 172  |     |     |
| CDH23          | 008          | 192  | 761 |     |
| DOCK4          | 051          | 282  |     |     |
| FAT3           | 618          | 761  |     |     |
| HMCN1          | 124          | 195  |     |     |
| HYDIN          | 018          | 091  | 181 | 761 |
| KIAA1632       | 032          | 155  |     |     |
| LPHN2          | 063          | 192  |     |     |
| PCDH11X        | 082          | 165  |     |     |
| PCLO           | 041          | 165  | 175 | 280 |
| PNPLA7         | 325          | 328  |     |     |
| ROS1           | 189          | 193  |     |     |
| RTTN           | 319          | 321  |     |     |
| RYR2           | 090          | 194  |     |     |
| TP53           | 618          |      |     |     |
| UNC13C         | 032          | 189  |     |     |
| VPRBP          | 193          | 290  |     |     |

Cases CLL1, CLL2, CLL3 and CLL4 have been described in Puente X.S. et al., *Nature* (2011), 475:101-5

**Supplementary Table 7.** Structural variants\* involving RM-CLL genes

| <b>Sample</b> | <b>Chr</b> | <b>Start</b> | <b>End</b>  | <b>Structural variant</b> | <b>RM-CLL genes involved</b> |
|---------------|------------|--------------|-------------|---------------------------|------------------------------|
| 016           | 1          | 158,895,935  | 207,100,978 | Inversion                 | HMCN1                        |
| 048           | 3          | 120,468,448  | 199,324,877 | Gain                      | EPHB1, KCNAB1, SI            |
| 016           | 4          | 55,259,599   | 190,916,819 | Gain                      | LPHN3, COL25A1, TLR2, FSTL5  |
| 016           | 6          | 92,406,400   | 117,192,979 | Inversion                 | ROS1                         |
| 064           | 8          | 59,529,447   | 144,292,596 | Gain                      | RIMS2, CSMD3                 |
| 026           | 11         | 78,834,995   | 115,325,262 | Loss                      | FAT3, ATM                    |
| 032           | 12         |              |             | Gain (Trisomy)            | SLCO1B1, C12orf64, TMTC2     |
| 064           | 12         |              |             | Gain (Trisomy)            | SLCO1B1, C12orf64, TMTC2     |
| 016           | 18         | 118,560      | 19,284,700  | Loss                      | ARHGAP28                     |
| 009           | X          | 132,393,797  | 155,227,312 | Gain                      | SPRY3                        |

\*Structural variants were assessed by aCGH, paired-end mapping and depth of coverage in 10 cases analyzed by whole genome sequencing

**Supplementary Table 8.** Biochemical pathways with somatic mutations in CLL

| KEGG pathways                                  |         |                                               |                                                                                                                  |
|------------------------------------------------|---------|-----------------------------------------------|------------------------------------------------------------------------------------------------------------------|
| Term                                           | Q-value | Genes                                         | Cancer types                                                                                                     |
| mRNA surveillance pathway                      | 0.001   | EIF4A3, MAGOH, MSI2, NCBP2, NUDT21, NXF1      |                                                                                                                  |
| Bladder cancer                                 | 0.003   | EGFR, IL8, MAP2K2, TP53                       | Bladder, Breast, Colorectal, Gastric, Leukemia, Lung, Brain, Melanoma, Ovary, Pancreas, Renal, Sarcoma           |
| Prostate cancer                                | 0.003   | CREB1, EGFR, FGFR2, MAP2K2, TP53              | Bladder, Breast, Colorectal, Gastric, Leukemia, Lung, Brain, Melanoma, Ovary, Pancreas, Renal, Sarcoma           |
| Spliceosome                                    | 0.003   | EIF4A3, MAGOH, NCBP2, RBMX, SF3B1, U2AF2      |                                                                                                                  |
| RNA transport                                  | 0.021   | EIF4A3, MAGOH, NCBP2, NXF1, XPO1              |                                                                                                                  |
| Endometrial cancer                             | 0.021   | EGFR, MAP2K2, TP53                            | Bladder, Breast, Colorectal, Gastric, Leukemia, Lung, Brain, Melanoma, Ovary, Pancreas, Renal                    |
| Malaria                                        | 0.021   | IL8, MYD88, TLR2                              |                                                                                                                  |
| Non-small cell lung cancer                     | 0.021   | EGFR, MAP2K2, TP53                            | Bladder, Breast, Colorectal, Gastric, Leukemia, Lung, Brain, Melanoma, Ovary, Pancreas                           |
| Toll-like receptor signaling pathway           | 0.021   | IL8, MAP2K2, MYD88, TLR2                      | Breast, Lung                                                                                                     |
| Pathways in cancer                             | 0.025   | EGFR, FGFR2, IL8, ITGA2B, MAP2K2, TP53, TRAF1 |                                                                                                                  |
| Glioma                                         | 0.028   | EGFR, MAP2K2, TP53                            | Bladder, Breast, Colorectal, Gastric, Leukemia, Lung, Brain, Melanoma, Ovary, Pancreas, Renal, Sarcoma           |
| Melanoma                                       | 0.033   | EGFR, MAP2K2, TP53                            | Bladder, Breast, Colorectal, Gastric, HeadNeck, Leukemia, Lung, Brain, Melanoma, Ovary, Pancreas, Renal, Sarcoma |
| Ribosome biogenesis in eukaryotes              | 0.043   | NXF1, RRP7A, XPO1                             |                                                                                                                  |
| Small cell lung cancer                         | 0.045   | ITGA2B, TP53, TRAF1                           | Breast, Colorectal, Leukemia, Lung, Brain, Melanoma, Ovary, Pancreas                                             |
| Gap junction                                   | 0.046   | EGFR, MAP2K2, TUBA3C                          | Colorectal, Leukemia, Lung, Brain, Melanoma, Pancreas                                                            |
| Apoptosis                                      | 0.046   | ATM, MYD88, TP53                              | Lung, Melanoma                                                                                                   |
| Chagas disease                                 | 0.062   | IL8, MYD88, TLR2                              |                                                                                                                  |
| Huntington's disease                           | 0.065   | CREB1, POLR2E, TBPL1, TP53                    |                                                                                                                  |
| Cell cycle                                     | 0.092   | ATM, CCNA2, TP53                              | Colorectal, Leukemia, Lung, Melanoma                                                                             |
| Regulation of actin cytoskeleton               | 0.094   | EGFR, FGFR2, ITGA2B, MAP2K2                   | Bladder, Breast, Colorectal, Gastric, Leukemia, Lung, Brain, Melanoma                                            |
| Hepatitis C                                    | 0.095   | EGFR, IL8, TP53                               |                                                                                                                  |
| GO Biological Processes                        |         |                                               |                                                                                                                  |
| Term                                           | Q-value | Genes                                         | Cancer types                                                                                                     |
| termination of RNA polymerase II transcription | 0.001   | MAGOH, NCBP2, NUDT21, U2AF2                   |                                                                                                                  |
| lactation                                      | 0.001   | BCAT2, CREB1, PRLR, VDR                       |                                                                                                                  |

|                                                                                    |       |                                                             |                          |
|------------------------------------------------------------------------------------|-------|-------------------------------------------------------------|--------------------------|
| nuclear mRNA splicing, via spliceosome                                             | 0.001 | MAGOH, NCBP2, NUDT21, POLR2E, RBMX, SF3B1, U2AF2            |                          |
| RNA splicing                                                                       | 0.001 | EIF4A3, MAGOH, NCBP2, NUDT21, POLR2E, RBMX, SF3B1, U2AF2    |                          |
| mRNA 3'-end processing                                                             | 0.001 | MAGOH, NCBP2, NUDT21, U2AF2                                 |                          |
| transcription from RNA polymerase II promoter                                      | 0.001 | CREB1, FUBP1, MAGOH, NCBP2, NUDT21, POLR2E, TBPL1, U2AF2    | Leukemia, Lung, Melanoma |
| Toll signaling pathway                                                             | 0.003 | CREB1, MAP2K2, MYD88, TLR2                                  |                          |
| toll-like receptor 1 signaling pathway                                             | 0.003 | CREB1, MAP2K2, MYD88, TLR2                                  |                          |
| toll-like receptor signaling pathway                                               | 0.003 | CREB1, MAP2K2, MYD88, TLR2                                  |                          |
| gene expression                                                                    | 0.003 | MAGOH, NCBP2, NUDT21, NXF1, POLR2E, RBMX, SF3B1, U2AF2, VDR | Leukemia, Melanoma       |
| nuclear-transcribed mRNA catabolic process, nonsense-mediated decay                | 0.003 | EIF4A3, MAGOH, NCBP2                                        |                          |
| mRNA export from nucleus                                                           | 0.003 | MAGOH, NCBP2, NXF1, U2AF2                                   | Brain                    |
| MyD88-dependent toll-like receptor signaling pathway                               | 0.003 | CREB1, MAP2K2, MYD88, TLR2                                  |                          |
| positive regulation of nitric oxide biosynthetic process                           | 0.003 | DDAH1, EGFR, TLR2                                           |                          |
| toll-like receptor 2 signaling pathway                                             | 0.003 | CREB1, MAP2K2, MYD88, TLR2                                  |                          |
| toll-like receptor 4 signaling pathway                                             | 0.003 | CREB1, MAP2K2, MYD88, TLR2                                  |                          |
| positive regulation of gene-specific transcription from RNA polymerase II promoter | 0.005 | CREB1, FGFR2, TAL1, TLR2, TP53                              |                          |
| interspecies interaction between organisms                                         | 0.006 | CREB1, DDX3X, KCTD5, NXF1, POLR2E, TP53, XPO1               |                          |
| mRNA transport                                                                     | 0.008 | EIF4A3, NXF1, XPO1                                          |                          |

| response to DNA damage stimulus                                                    | 0.013          | ATM, C9orf80, MGMT, TP53                                                          | Brain, Leukemia, Lung, Melanoma                                                |
|------------------------------------------------------------------------------------|----------------|-----------------------------------------------------------------------------------|--------------------------------------------------------------------------------|
| Ras protein signal transduction                                                    | 0.016          | CCNA2, MAP2K2, TP53                                                               | Bladder, Brain, Breast, Colorectal, Gastric, Leukemia, Lung, Melanoma          |
| mRNA processing                                                                    | 0.022          | EIF4A3, MBNL2, NCBP2, NUDT21, U2AF2                                               |                                                                                |
| transcription                                                                      | 0.022          | MAGOH, NCBP2, NUDT21, POLR2E, U2AF2                                               | Leukemia, Lung, Melanoma, Sarcoma                                              |
| positive regulation of NF-kappaB transcription factor activity                     | 0.022          | MYD88, TLR2, TRAF1                                                                | Lung, Melanoma                                                                 |
| regulation of apoptosis                                                            | 0.048          | CASP1, CREB1, TP53, TRAF1                                                         | Leukemia, Lung, Lymphoma, Melanoma                                             |
| regulation of cell proliferation                                                   | 0.051          | EGFR, MYD88, PTGER2                                                               | Bladder, Brain, Colorectal, Gastric, Leukemia, Lung, Lymphoma, Melanoma, Renal |
| cell cycle arrest                                                                  | 0.06           | ATM, IL8, TP53                                                                    | Leukemia, Lung, Melanoma                                                       |
| positive regulation of I-kappaB kinase/NF-kappaB cascade                           | 0.068          | CASP1, MYD88, TRAF1                                                               |                                                                                |
| cell death                                                                         | 0.068          | ATM, CASP1, DPP6                                                                  | Colorectal, Leukemia, Lung, Lymphoma, Melanoma                                 |
| signal transduction                                                                | 0.068          | ATM, CASP1, CREB1, EGFR, IL8, MYD88, PENK, RAB33A, RAP2C, TLR2, TRAF1, VDR, VOPP1 | Brain, Colorectal, Gastric, Leukemia, Lung, Lymphoma, Melanoma, Ovary          |
| innate immune response                                                             | 0.078          | CREB1, MAP2K2, MYD88, TLR2                                                        |                                                                                |
| negative regulation of gene-specific transcription from RNA polymerase II promoter | 0.088          | FGFR2, TP53, VDR                                                                  |                                                                                |
| <b>NCI Nature Pathways</b>                                                         |                |                                                                                   |                                                                                |
| <b>Term</b>                                                                        | <b>Q-value</b> | <b>Genes</b>                                                                      | <b>Cancer types</b>                                                            |
| p75(NTR)-mediated signaling                                                        | 0.011          | MAGEH1, MYD88, TP53                                                               |                                                                                |
| AP-1 transcription factor network                                                  | 0.011          | CREB1, IL8, PENK, TP53                                                            |                                                                                |
| Glucocorticoid receptor regulatory network                                         | 0.011          | CREB1, CSN2, IL8, TP53                                                            |                                                                                |
| Validated transcriptional targets of deltaNp63 isoforms                            | 0.023          | ADA, ATM, VDR                                                                     |                                                                                |
| ATF-2 transcription factor network                                                 | 0.023          | CCNA2, CREB1, IL8                                                                 |                                                                                |

|                                                     |       |                        |
|-----------------------------------------------------|-------|------------------------|
| Validated transcriptional targets of TAp63 isoforms | 0.023 | ADA, EGR2, VDR         |
| Direct p53 effectors                                | 0.034 | CASP1, EGFR, TP53, VDR |

---

**Supplementary Table 9.** Pathway analysis of the genes found mutated in *IGHV*-mutated CLL

| KEGG pathways                                                                      |         |                                     |                                                                                                        |
|------------------------------------------------------------------------------------|---------|-------------------------------------|--------------------------------------------------------------------------------------------------------|
| Term                                                                               | Q-value | Genes                               | Cancer types                                                                                           |
| Bladder cancer                                                                     | 0.006   | EGFR, IL8, TP53                     | Bladder, Breast, Colorectal, Gastric, Leukemia, Lung, Brain, Melanoma, Ovary, Pancreas, Renal, Sarcoma |
| Malaria                                                                            | 0.006   | IL8, MYD88, TLR2                    |                                                                                                        |
| mRNA surveillance pathway                                                          | 0.014   | EIF4A3, MSI2, NUDT21                |                                                                                                        |
| Prostate cancer                                                                    | 0.014   | EGFR, FGFR2, TP53                   | Bladder, Breast, Colorectal, Gastric, Leukemia, Lung, Brain, Melanoma, Ovary, Pancreas, Renal, Sarcoma |
| Chagas disease                                                                     | 0.015   | IL8, MYD88, TLR2                    |                                                                                                        |
| Toll-like receptor signaling pathway                                               | 0.015   | IL8, MYD88, TLR2                    | Breast, Lung                                                                                           |
| Spliceosome                                                                        | 0.022   | EIF4A3, RBMX, SF3B1                 |                                                                                                        |
| Hepatitis C                                                                        | 0.023   | EGFR, IL8, TP53                     |                                                                                                        |
| Pathways in cancer                                                                 | 0.048   | EGFR, FGFR2, IL8, TP53              |                                                                                                        |
| Endocytosis                                                                        | 0.052   | CHMP2B, EGFR, FGFR2                 |                                                                                                        |
| Cytokine-cytokine receptor interaction                                             | 0.085   | EGFR, IL8, PRLR                     | Gastric                                                                                                |
| MAPK signaling pathway                                                             | 0.085   | EGFR, FGFR2, TP53                   | Breast, Colorectal, Leukemia, Lung, Melanoma                                                           |
| GO Biological Processes                                                            |         |                                     |                                                                                                        |
| Term                                                                               | Q-value | Genes                               | Cancer types                                                                                           |
| lactation                                                                          | 0.003   | BCAT2, PRLR, VDR                    |                                                                                                        |
| RNA splicing                                                                       | 0.007   | EIF4A3, NUDT21, POLR2E, RBMX, SF3B1 |                                                                                                        |
| nuclear mRNA splicing, via spliceosome                                             | 0.007   | NUDT21, POLR2E, RBMX, SF3B1         |                                                                                                        |
| positive regulation of gene-specific transcription from RNA polymerase II promoter | 0.007   | FGFR2, TAL1, TLR2, TP53             |                                                                                                        |
| regulation of cell proliferation                                                   | 0.019   | EGFR, MYD88, PTGER2                 | Bladder, Brain, Colorectal, Gastric, Leukemia, Lung, Lymphoma, Melanoma, Renal                         |
| response to DNA damage stimulus                                                    | 0.02    | C9orf80, MGMT, TP53                 | Brain, Leukemia, Lung, Melanoma                                                                        |
| gene expression                                                                    | 0.026   | NUDT21, POLR2E, RBMX, SF3B1, VDR    | Leukemia, Melanoma                                                                                     |
| negative regulation of gene-specific transcription from RNA polymerase II promoter | 0.027   | FGFR2, TP53, VDR                    |                                                                                                        |
| cell surface receptor linked signaling pathway                                     | 0.068   | EGFR, MYD88, PRLR                   | Brain, Colorectal, Gastric, Leukemia, Lung, Melanoma                                                   |
| multicellular organismal development                                               | 0.1     | CLC, PHC2, TAL1, TCL1A, TP53, VDR   | Bladder, Brain, Colorectal, Gastric, HeadNeck, Leukemia, Lung, Melanoma                                |
| DNA repair                                                                         | 0.1     | C9orf80, MGMT, POLR2E               | Leukemia, Lung, Melanoma                                                                               |

**NCI Nature Pathways**

| <b>Term</b>          | <b>Q-value</b> | <b>Genes</b>    | <b>Cancer types</b> |
|----------------------|----------------|-----------------|---------------------|
| Direct p53 effectors | 0.012          | EGFR, TP53, VDR |                     |



**Supplementary Table 10.** Pathway analysis of the genes found mutated in *IGHV*- unmutated CLL

| KEGG pathways                                  |         |                                                     |                                                                                                        |
|------------------------------------------------|---------|-----------------------------------------------------|--------------------------------------------------------------------------------------------------------|
| Term                                           | Q-value | Genes                                               | Cancer types                                                                                           |
| Prostate cancer                                | 0.005   | CREB1, EGFR, FGFR2, MAP2K2                          | Bladder, Breast, Colorectal, Gastric, Leukemia, Lung, Brain, Melanoma, Ovary, Pancreas, Renal, Sarcoma |
| Spliceosome                                    | 0.01    | MAGOH, NCBP2, SF3B1, U2AF2                          |                                                                                                        |
| mRNA surveillance pathway                      | 0.012   | MAGOH, NCBP2, NXF1                                  |                                                                                                        |
| RNA transport                                  | 0.012   | MAGOH, NCBP2, NXF1, XPO1                            |                                                                                                        |
| Regulation of actin cytoskeleton               | 0.021   | EGFR, FGFR2, ITGA2B, MAP2K2                         | Bladder, Breast, Colorectal, Gastric, Leukemia, Lung, Brain, Melanoma                                  |
| Pathways in cancer                             | 0.021   | EGFR, FGFR2, ITGA2B, MAP2K2, TRAF1                  |                                                                                                        |
| GO Biological Processes                        |         |                                                     |                                                                                                        |
| Term                                           | Q-value | Genes                                               | Cancer types                                                                                           |
| mRNA 3'-end processing                         | 0.001   | MAGOH, NCBP2, U2AF2                                 |                                                                                                        |
| termination of RNA polymerase II transcription | 0.001   | MAGOH, NCBP2, U2AF2                                 |                                                                                                        |
| transcription from RNA polymerase II promoter  | 0.001   | CREB1, FUBP1, MAGOH, NCBP2, TBPL1, U2AF2            | Leukemia, Lung, Melanoma                                                                               |
| mRNA export from nucleus                       | 0.001   | MAGOH, NCBP2, NXF1, U2AF2                           | Brain                                                                                                  |
| nuclear mRNA splicing, via spliceosome         | 0.003   | MAGOH, NCBP2, SF3B1, U2AF2                          |                                                                                                        |
| interspecies interaction between organisms     | 0.01    | CREB1, DDX3X, KCTD5, NXF1, XPO1                     |                                                                                                        |
| gene expression                                | 0.024   | MAGOH, NCBP2, NXF1, SF3B1, U2AF2                    | Leukemia, Melanoma                                                                                     |
| RNA splicing                                   | 0.024   | MAGOH, NCBP2, SF3B1, U2AF2                          |                                                                                                        |
| axon guidance                                  | 0.03    | CREB1, EGFR, ITGA2B, MAP2K2                         |                                                                                                        |
| regulation of apoptosis                        | 0.042   | CASP1, CREB1, TRAF1                                 | Leukemia, Lung, Lymphoma, Melanoma                                                                     |
| protein phosphorylation                        | 0.047   | ATM, CREB1, EGFR, FGFR2, MAP2K2                     | Brain, Breast, Colorectal, Gastric, Leukemia, Lung, Melanoma                                           |
| transcription                                  | 0.051   | MAGOH, NCBP2, U2AF2                                 | Leukemia, Lung, Melanoma, Sarcoma                                                                      |
| mRNA processing                                | 0.051   | MBNL2, NCBP2, U2AF2                                 |                                                                                                        |
| signal transduction                            | 0.079   | ATM, CASP1, CREB1, EGFR, PENK, RAB33A, TRAF1, VOPP1 | Brain, Colorectal, Gastric, Leukemia, Lung, Lymphoma, Melanoma, Ovary                                  |

**Supplementary Table 11.** CLL non-synonymous somatic mutations in *SF3B1*

| <b>Mutation</b> | <b>Exon</b> | <b>N</b> | <b>Frequency</b> |
|-----------------|-------------|----------|------------------|
| p.K700E         | 15          | 9        | 3.2%             |
| p.G742D         | 16          | 6        | 2.2%             |
| p.N626Y         | 14          | 2        | 0.7%             |
| p.T663I         | 14          | 2        | 0.7%             |
| p.K666E         | 14          | 2        | 0.7%             |
| p.Y623C         | 14          | 1        | 0.4%             |
| p.R625H         | 14          | 1        | 0.4%             |
| p.H662D         | 14          | 1        | 0.4%             |
| p.V701F         | 15          | 1        | 0.4%             |
| p.K741N         | 15          | 1        | 0.4%             |
| p.D894G         | 18          | 1        | 0.4%             |

**Supplementary Table 12.** Genes predicted to be alternatively spliced in *SF3B1* mutated and unmutated cases

| Gene Symbol | Cluster ID | RefSeq       | p-value  |
|-------------|------------|--------------|----------|
| DENND2C     | 2429147    | NM_198459    | 3.00E-23 |
| WWC1        | 2839543    | NM_001161661 | 1.37E-18 |
| SEL1L3      | 2764192    | NM_015187    | 2.78E-16 |
| CRNKL1      | 3899954    | NM_016652    | 5.91E-15 |
| SEC14L1     | 3735752    | NM_001143998 | 1.90E-14 |
| ZKSCAN5     | 3014855    | NM_014569    | 2.56E-14 |
| ADAR        | 2436754    | NM_001111    | 1.26E-13 |
| CASC3       | 3720739    | NM_007359    | 2.54E-12 |
| TP53BP1     | 3621194    | NM_001141980 | 8.18E-12 |
| C10orf46    | 3309124    | NM_153810    | 3.63E-11 |
| OTUD5       | 4007643    | NM_017602    | 6.56E-11 |
| LRRFIP2     | 2669184    | NM_006309    | 6.87E-11 |
| C10orf137   | 3269587    | NM_015608    | 9.76E-11 |
| OSBP        | 3374698    | NM_002556    | 9.85E-11 |
| BCL9        | 2356818    | NM_004326    | 1.01E-10 |
| ZNF274      | 3843797    | NM_133502    | 1.67E-10 |
| SH2B3       | 3431892    | NM_005475    | 1.97E-10 |
| ATP11C      | 4024160    | NM_173694    | 1.99E-10 |
| TGIF1       | 3776504    | NM_170695    | 2.24E-10 |
| FAM82A2     | 3619595    | NM_018145    | 2.39E-10 |
| GLS         | 2520291    | NM_014905    | 2.48E-10 |
| MTMR10      | 3615985    | NM_017762    | 2.80E-10 |
| TRIM33      | 2429069    | NM_015906    | 2.84E-10 |
| CGRRF1      | 3536396    | NM_006568    | 3.30E-10 |
| CEP76       | 3799542    | NM_024899    | 3.81E-10 |
| ELAC2       | 3746040    | NM_018127    | 5.16E-10 |
| CCAR1       | 3249788    | NM_018237    | 5.43E-10 |
| TM9SF4      | 3881686    | NM_014742    | 1.02E-09 |
| PTDSS1      | 3108072    | NM_014754    | 1.03E-09 |
| ZMYM6       | 2405992    | NM_007167    | 1.23E-09 |
| WHSC1L1     | 3131916    | NM_023034    | 2.39E-09 |
| TFE3        | 4007734    | NM_006521    | 3.39E-09 |
| MTMR1       | 3994846    | NM_003828    | 3.94E-09 |
| PTPN1       | 3888721    | NM_002827    | 3.95E-09 |
| NCOA3       | 3887635    | NM_181659    | 4.15E-09 |
| MAP3K5      | 2975867    | NM_005923    | 4.71E-09 |
| RNF149      | 2567583    | NM_173647    | 5.48E-09 |
| EPC1        | 3284073    | NM_025209    | 5.89E-09 |
| NDUFA10     | 2606574    | NM_004544    | 8.25E-09 |
| DCAF13      | 3110341    | NM_015420    | 1.20E-08 |
| C3orf25     | 2694753    | BC066975     | 1.57E-08 |
| RNF216      | 3036985    | NM_207111    | 1.60E-08 |
| FBXL20      | 3755655    | NM_032875    | 1.95E-08 |
| PLK4        | 2742985    | NM_014264    | 2.31E-08 |

|          |         |              |          |
|----------|---------|--------------|----------|
| ASNSD1   | 2519860 | NM_019048    | 2.66E-08 |
| AKAP8    | 3853299 | NM_005858    | 3.20E-08 |
| LMBR1L   | 3453774 | NM_018113    | 3.63E-08 |
| C8orf41  | 3130823 | NM_025115    | 4.21E-08 |
| ABCF3    | 2655511 | NM_018358    | 4.93E-08 |
| MIR650   | 3938384 | NR_030755    | 5.10E-08 |
| TAP2     | 2950167 | NM_000544    | 5.27E-08 |
| HARS     | 2878474 | NM_002109    | 5.90E-08 |
| C11orf30 | 3340913 | NM_020193    | 6.05E-08 |
| DDX3X    | 3974838 | NM_001356    | 6.28E-08 |
| NAPB     | 3901191 | NM_022080    | 7.62E-08 |
| DLAT     | 3348852 | NM_001931    | 7.93E-08 |
| SNAP29   | 3937755 | NM_004782    | 8.07E-08 |
| TNRC6A   | 3653398 | NM_014494    | 9.00E-08 |
| EIF3B    | 2987441 | NM_001037283 | 1.16E-07 |
| IARS     | 3214668 | NM_013417    | 1.24E-07 |
| CDK5RAP1 | 3902983 | NM_016408    | 1.26E-07 |
| ARID1B   | 2932928 | NM_017519    | 1.38E-07 |
| CAST     | 2821194 | NM_001750    | 2.01E-07 |
| PEX1     | 3061191 | NM_000466    | 2.20E-07 |
| SFMBT1   | 2676518 | NM_001005159 | 2.30E-07 |
| ZNF585A  | 3860737 | NM_152655    | 2.79E-07 |
| TBCK     | 2780734 | NM_001163436 | 2.82E-07 |
| COPS5    | 3138978 | NM_006837    | 3.10E-07 |
| KIF6     | 2952959 | NM_145027    | 4.09E-07 |
| ZC3H14   | 3547610 | NM_024824    | 4.10E-07 |
| PGRMC2   | 2785114 | NM_006320    | 4.81E-07 |
| GABRA3   | 4026075 | NM_000808    | 4.91E-07 |
| TOPBP1   | 2695941 | NM_007027    | 4.93E-07 |
| EDEM2    | 3903778 | NR_026728    | 5.99E-07 |
| LATS2    | 3504526 | NM_014572    | 6.05E-07 |
| USP36    | 3772581 | NM_025090    | 6.54E-07 |
| MARCH10  | 3766013 | NM_152598    | 7.08E-07 |
| DNAJC17  | 3619650 | NM_018163    | 7.29E-07 |
| SMC5     | 3174224 | NM_015110    | 8.29E-07 |
| UCK1     | 3227645 | NM_031432    | 8.53E-07 |
| ZER1     | 3226661 | NM_006336    | 9.19E-07 |
| PPIL2    | 3938244 | NM_014337    | 9.70E-07 |
| MTMR3    | 3942179 | NM_021090    | 1.09E-06 |
| BCL10    | 2420808 | NM_003921    | 1.11E-06 |
| NRF1     | 3023565 | NM_005011    | 1.16E-06 |
| CPSF2    | 3548788 | NM_017437    | 1.29E-06 |
| FAF1     | 2412082 | NM_007051    | 1.30E-06 |
| USP33    | 2419113 | NM_015017    | 1.31E-06 |
| RBBP6    | 3653317 | NM_006910    | 1.38E-06 |
| STRADA   | 3766284 | NM_153335    | 1.40E-06 |
| UBOX5    | 3895232 | NM_014948    | 1.46E-06 |
| DDHD1    | 3564997 | NM_001160148 | 1.59E-06 |
| ZC3HAV1  | 3075566 | NM_020119    | 1.64E-06 |
| UBE2D3   | 2779992 | NM_181892    | 1.90E-06 |

|         |         |              |          |
|---------|---------|--------------|----------|
| SNCA    | 2777714 | NM_000345    | 2.35E-06 |
| ORC2L   | 2594569 | NM_006190    | 2.35E-06 |
| FANCD2  | 2610241 | NM_033084    | 2.37E-06 |
| RNF25   | 2599536 | NM_022453    | 2.56E-06 |
| FBXW11  | 2886977 | NM_033644    | 2.58E-06 |
| MCM9    | 2971692 | NM_153255    | 3.25E-06 |
| ZFP91   | 3331730 | NM_053023    | 3.37E-06 |
| STAMPB  | 2488959 | NM_213622    | 3.47E-06 |
| TRIM8   | 3261820 | NM_030912    | 3.86E-06 |
| HIP1R   | 3435548 | NM_003959    | 3.94E-06 |
| NAP1L4  | 3359469 | NM_005969    | 3.97E-06 |
| PAF1    | 3861978 | NM_019088    | 4.24E-06 |
| NFKB1   | 2737717 | NM_003998    | 4.27E-06 |
| EBP     | 3976670 | NM_006579    | 4.73E-06 |
| TERF2   | 3696571 | NM_005652    | 4.99E-06 |
| BUB3    | 3268669 | NM_004725    | 5.44E-06 |
| HTATSF1 | 3992521 | NM_001163280 | 5.53E-06 |
| TMEM154 | 2790062 | NM_152680    | 5.76E-06 |
| CDK16   | 3976124 | NM_006201    | 6.07E-06 |
| RASGRF1 | 3634852 | NM_002891    | 6.26E-06 |
| ERP44   | 3217736 | NM_015051    | 6.61E-06 |
| VHL     | 2610336 | NM_000551    | 6.97E-06 |
| TMCC1   | 2694931 | NM_001017395 | 7.03E-06 |
| RAD50   | 2828564 | NM_005732    | 7.12E-06 |
| IFRD2   | 2675088 | NM_006764    | 8.74E-06 |
| POTEA   | 3096638 | NM_001005365 | 9.09E-06 |
| PLCH2   | 2316605 | NM_014638    | 9.50E-06 |
| ELF5    | 3369117 | NM_198381    | 9.67E-06 |
| HNRNPM  | 3819543 | NM_005968    | 1.00E-05 |
| ACOT2   | 3543673 | NM_006821    | 1.01E-05 |
| CTSS    | 2434575 | NM_004079    | 1.09E-05 |
| OSGIN2  | 3106276 | NM_004337    | 1.12E-05 |
| TWSG1   | 3778372 | NM_020648    | 1.33E-05 |
| HOOK3   | 3096368 | NM_032410    | 1.39E-05 |
| WDR55   | 2831619 | NM_017706    | 1.39E-05 |
| TMX1    | 3535395 | NM_030755    | 1.64E-05 |
| OGFOD1  | 3662041 | NM_018233    | 1.71E-05 |
| MGEA5   | 3304012 | NM_012215    | 1.81E-05 |
| BTN2A1  | 2899437 | NM_078476    | 1.90E-05 |
| SENP6   | 2913983 | NM_015571    | 1.95E-05 |
| SRRD    | 3941010 | NM_001013694 | 2.09E-05 |
| DUSP12  | 2363902 | NM_007240    | 2.19E-05 |
| JTB     | 2436401 | NM_006694    | 2.24E-05 |
| ZNF562  | 3849549 | NM_001130031 | 2.28E-05 |
| MICALL1 | 3945084 | NM_033386    | 2.45E-05 |
| ICK     | 2957499 | NM_016513    | 2.71E-05 |
| GTDC1   | 2579439 | NM_001006636 | 2.79E-05 |
| FAS     | 3257098 | NM_000043    | 2.92E-05 |
| ARL8A   | 2451139 | NM_138795    | 3.26E-05 |
| STXBP5  | 2929870 | NM_001127715 | 3.42E-05 |

|          |         |              |          |
|----------|---------|--------------|----------|
| EIF2C3   | 2330133 | NM_024852    | 3.72E-05 |
| CYP2E1   | 3272981 | NM_000773    | 4.09E-05 |
| SRP68    | 3771297 | NM_014230    | 4.37E-05 |
| HCP5     | 2902326 | NM_006674    | 4.77E-05 |
| DDX46    | 2829488 | NM_014829    | 5.07E-05 |
| IMPDH2   | 2673873 | NM_000884    | 5.46E-05 |
| SP140    | 2531233 | NM_007237    | 5.54E-05 |
| SART3    | 3470253 | NM_014706    | 5.72E-05 |
| SLC30A5  | 2813364 | NM_022902    | 6.21E-05 |
| CXCL5    | 2773369 | NM_002994    | 6.68E-05 |
| MAP2K4   | 3710681 | NM_003010    | 6.80E-05 |
| ZDHHC3   | 2671652 | NM_016598    | 6.89E-05 |
| CD47     | 2687739 | NM_001777    | 6.97E-05 |
| C7orf10  | 2998638 | NM_024728    | 7.77E-05 |
| TOX2     | 3886294 | NM_032883    | 8.54E-05 |
| DEK      | 2944068 | NM_003472    | 8.85E-05 |
| FAM32A   | 3823613 | AF151902     | 8.95E-05 |
| PIGS     | 3750740 | NM_033198    | 9.37E-05 |
| PSIP1    | 3199790 | NM_033222    | 0.0001   |
| ZNHIT1   | 3016211 | NM_006349    | 0.00011  |
| FAM190B  | 3255402 | NM_018999    | 0.00012  |
| CUZD1    | 3310675 | NM_022034    | 0.00013  |
| CAMK2A   | 2881300 | NM_015981    | 0.00013  |
| MYH6     | 3557430 | NM_002471    | 0.00013  |
| NSFL1C   | 3894637 | NM_016143    | 0.00014  |
| SFRS5    | 3542207 | NM_001039465 | 0.00014  |
| STAG3    | 3015338 | NM_012447    | 0.00016  |
| RNF146   | 2924898 | NM_030963    | 0.00018  |
| SRP19    | 2824286 | NM_003135    | 0.0002   |
| BMP2K    | 2732942 | NM_198892    | 0.0002   |
| KIAA1586 | 2911257 | NM_020931    | 0.00021  |
| GTF3C3   | 2593352 | NM_012086    | 0.00021  |
| TRIM22   | 3318443 | NM_006074    | 0.00022  |
| SLC7A14  | 2705030 | NM_020949    | 0.00022  |
| CLDND1   | 2685908 | NM_001040199 | 0.00023  |
| CDHR3    | 3018011 | NM_152750    | 0.00029  |
| GCC1     | 3071285 | NM_024523    | 0.00029  |
| BBS4     | 3600960 | NM_033028    | 0.00031  |
| KIAA1009 | 2962998 | NM_014895    | 0.00033  |
| SMAD5    | 2830010 | NM_001001419 | 0.00033  |

**Supplementary Table 13.** Validated splicing targets affected by *SF3B1* mutation in CLL patients

| Gene           | Junction                     | Junction coverage<br>(RPKM $\pm$ s.e.m.) |                            | Gene coverage<br>(RPKM $\pm$ s.e.m.) |                            |
|----------------|------------------------------|------------------------------------------|----------------------------|--------------------------------------|----------------------------|
|                |                              | <i>SF3B1</i> <sup>MUT</sup>              | <i>SF3B1</i> <sup>WT</sup> | <i>SF3B1</i> <sup>MUT</sup>          | <i>SF3B1</i> <sup>WT</sup> |
| <i>FOXP1</i>   | chr3: 71,019,346-71,019,887  | 324 $\pm$ 44                             | 27 $\pm$ 19                | 17 $\pm$ 2                           | 17 $\pm$ 2                 |
| <i>SLC23A2</i> | chr20: 4,843,573-4,848,416   | 65 $\pm$ 9                               | 0 $\pm$ 0                  | 32 $\pm$ 5                           | 29 $\pm$ 2                 |
| <i>TCIRG1</i>  | chr11: 67,815,440-67,815,554 | 236 $\pm$ 38                             | 7 $\pm$ 6                  | 110 $\pm$ 57                         | 76 $\pm$ 15                |

**Supplementary Table 14.** Clinical and biological features of the 279 CLL patients included in the validation study

| Parameter                                         | Category       | <i>SF3B1</i>         | <i>SF3B1</i> mutated | p     |
|---------------------------------------------------|----------------|----------------------|----------------------|-------|
|                                                   |                | unmutated<br>(n=252) | (n=27)               |       |
| Gender                                            | Male (%)       | 144 (57%)            | 19 (70%)             | ns    |
| Age (years), median (range)                       |                | 58 (24-93)           | 54 (33-82)           | ns    |
| Binet stage*                                      | A              | 206 (82%)            | 16 (59%)             | 0.004 |
|                                                   | B              | 38 (15%)             | 11 (39%)             |       |
|                                                   | C              | 6 (2%)               | 0 (0%)               |       |
| Rai stage*                                        | 0              | 146 (58%)            | 7 (26%)              | 0.004 |
|                                                   | I-II           | 95 (38%)             | 19 (70%)             |       |
|                                                   | III-IV         | 9 (4%)               | 1 (4%)               |       |
| Lymphocytes (x10 <sup>9</sup> /L), median (range) | 13.2 (1.7-337) | 19.0 (3.2-111)       | ns                   |       |
| Hemoglobin (g/L), median (range)                  | 139 (63-175)   | 140 (108-165)        | ns                   |       |
| Platelets (x10 <sup>9</sup> /L), median (range)   | 200 (19-470)   | 180 (106-456)        | ns                   |       |
| LDH                                               | >UNL           | 21/226 (9%)          | 3/25 (12%)           | ns    |
| β <sub>2</sub> -microglobulin                     | >UNL           | 50/204 (25%)         | 13/25 (52%)          | 0.008 |
| Lymphocyte doubling time                          | < 1 year       | 31/153 (20%)         | 5/15 (33%)           | ns    |
| CD38                                              | High           | 58/218 (27%)         | 10/21 (48%)          | ns    |
| ZAP-70                                            | High           | 60/207 (29%)         | 12/24 (50%)          | ns    |
| IGHV                                              | Unmutated      | 58/128 (45%)         | 15/21 (79%)          | 0.03  |
| <i>NOTCH1</i>                                     | Mutated        | 20/244 (8%)          | 5/16 (31%)           | 0.01  |
| 5-year time TTP (95% CI)                          | Binet stage A  | 34% (27-42)          | 73% (51-96)          | 0.002 |
| 10-year time to Richter (95% CI)                  | All            | 10% (8-12)           | 9% (0-21)            | ns    |
| 10-year OS (95% CI)                               | All            | 77% (70-84)          | 30% (6-54)           | 0.002 |
| Follow-up (years), median (range)                 | 6.4 (0.1-25)   | 4.1 (0.5-11.9)       | ns                   |       |

CD38 high: ≥30% positive CLL cells; ZAP-70 high: ≥ 20% positive CLL cells; *IGHV* unmutated: ≥ 98% homology with germline; TTP: time to progression; OS: overall survival. \*Stage information was not available for two patients.



**Supplementary Table 15.** Main clinical and biological features with prognostic relevance in 279 patients with CLL

| Parameter     | Category  | N   | 5-year OS | 10-year OS | P value |
|---------------|-----------|-----|-----------|------------|---------|
| All patients  | All       | 279 | 89.8      | 70.4       | -       |
| Binet stage   | A         | 218 | 91.6      | 76.4       | 0.004   |
|               | B         | 48  | 85.3      | 55.3       |         |
|               | C         | 6   | 66.7      | 44.1       |         |
| Rai stage     | 0         | 150 | 92.1      | 82.3       | <0.001  |
|               | I-II      | 112 | 89.9      | 61.1       |         |
|               | III-IV    | 10  | 52.5      | 35         |         |
| ZAP-70        | Low       | 158 | 95.4      | 85.2       | 0.002   |
|               | High      | 72  | 87.3      | 59.2       |         |
| CD38          | Low       | 169 | 93.6      | 80.5       | 0.004   |
|               | High      | 67  | 87.3      | 57.8       |         |
| <i>IGHV</i>   | Unmutated | 72  | 90.7      | 48.5       | 0.003   |
|               | Mutated   | 77  | 92.3      | 90.1       |         |
| <i>NOTCH1</i> | Unmutated | 235 | 90.5      | 72.3       | 0.05    |
|               | Mutated   | 25  | 72.2      | 36.1       |         |
| <i>SF3B1</i>  | Unmutated | 252 | 90.3      | 76.8       | 0.002   |
|               | Mutated   | 27  | 84.9      | 29.8       |         |

**Supplementary Table 16.** Primers used for quantitative polymerase chain reaction

| Gene    | Form      | Sequence                        |
|---------|-----------|---------------------------------|
| TCIRG   | Truncated | 5'-CCAACGTCACCGGTGTCTTC-3'      |
|         |           | 5'- TCTGCCTCTTGCTGAGGAA-3'      |
|         | Control   | 5'- CCAGGATGACGGACATCTTCA-3'    |
|         |           | 5'- CCAACGTCACCGGTGTCTTC-3'     |
| SLC23A2 | Truncated | 5'-TTCATCCAGTCCCAACATTGG-3'     |
|         |           | 5'-CTGCCGACCTGCAGAACAC-3'       |
|         | Control   | 5'- TTCATCCAGTCCCAACATTGG-3'    |
|         |           | 5'-CATGCCAGAGCGAGCAT-3'         |
| FOXP1   | Truncated | 5'- CCTACTGCACACCTCTCAATGC-3'   |
|         |           | 5'-CTGGTACCATTGGTGATGTAACAAG-3' |
|         | Control   | 5'- CCTACTGCACACCTCTCAATGC-3'   |
|         |           | 5'-CATGGAAGCGGTAGTGTATAGAGGT-3' |
